# Supplementary material for: Rare disease patients in India are rarely involved in international orphan drug trials
Source: PLOS Glob Public Health. 2022 Aug 15;2(8):e0000890. doi: 10.1371/journal.pgph.0000890 (PMC10021652; doi:10.1371/journal.pgph.0000890)
Supplement: S1 File — a. The list of 862 ODs approved in the US between 1 January 1983 and 17 April 2020, inclusive, obtained from FDAOD. b. The list of the 862 ODs’ 552 unique trade names, and their break up into (i) 413 with single approvals, (ii) 139 with multiple approvals, and (iii) 40 cases with trade names unavailable. c. Of the 413 single approval trade names, 123 had a single mention in the Orange Book, and 290 either did not have any mention in the Orange Book or had multiple mentions in it. d. Of the 123 ODs with a single occurrence in the Orange Book, 72 were approved after 31 Dec 2008. e. Of the 72 ODs approved after 31 Dec 2008, 63 had publicly available FDA documents such as the Medical Review. f. The list of 63 ODs, with their year of marketing approval and the FDA document consulted for this study. g. From 2009–2020, per year (i) the number of ODs in this study, (ii) the percentage of ODs, out of 63 (iii) the percentage, in 3-year segments. (XLS) [file pgph.0000890.s001.xls]

## Sheet: Legends
S1 File: The steps involved in identifying the 63 ODs for this study.
Sheet number and name	Legend	Significant number of records at this step
1a_862 orphan approvals	S1a File. The list of 862 ODs approved in the US between 1 January 1983 and 17 April 2020, inclusive, obtained from FDAOD.	862
1b_552 unique trade names	S1b File. The list of the 862 ODs’ 552 unique trade names, and their break up into (i) 413 with single approvals, (ii) 139 with multiple approvals, and (iii) 40 cases with trade names unavailable.	552
1c_413 single occurrence in FDAOD	S1c File. Of the 413 single approval trade names, 123 had a single mention in the Orange Book, and 290 either did not have any mention in the Orange Book or had multiple mentions in it.	413
1d_123 single occurence in Orange Book	S1d File. Of the 123 ODs with a single occurrence in the Orange Book, 72 were approved after 31 Dec 2008.	123
1e_72 ➡ 63+9	S1e File. Of the 72 ODs approved after 31 Dec 2008, 63 had publicly available FDA documents such as the Medical Review.	72
1f_Year of marketing approval_nature of MedR per OD	S1f File. The list of 63 ODs, with their year of marketing approval and the FDA document consulted for this study.	63
1g_ODs over the years	S1g File. From 2009–2020, per year (i) the number of ODs in this study, (ii) the percentage of ODs, out of 63 (iii) the percentage, in 3-year segments.	63

## Sheet: 1a_862 orphan approvals
S1a File. The list of 862 ODs approved in the US between 1 January 1983 and 17 April 2020, inclusive, obtained from FDAOD.
Number	Generic Name	Trade Name	Designation Date	Designation	Orphan Drug Status	FDA Approval Status	Approved Labeled Indication	Marketing Approval Date
1	tucatinib	n/a	2017-06-05	Treatment of breast cancer patients with brain metastases.	Designated/Approved	Approved for Orphan Indication	TUKYSA is indicated in combination with trastuzumab and capecitabine for treatment of adult patients with advanced unresectable or metastatic HER2-positive breast cancer, including patients with brain metastases, who have received one or more prior anti-HER2-based regimens in the metastatic setting.	2020-04-17
2	mitomycin	Jelmyto	2014-09-08	Treatment of upper tract urothelial cell cancers (transitional cell carcinoma of the renal pelvis and ureter)	Designated/Approved	Approved for Orphan Indication	JELMYTO™ is indicated for the treatment of adult patients with low-grade Upper Tract Urothelial Cancer (LG-UTUC)	2020-04-15
3	selumetinib	n/a	2018-02-14	Treatment of Neurofibromatosis Type 1	Designated/Approved	Approved for Orphan Indication	KOSELUGO is indicated for the treatment of pediatric patients 2 years of age and older with neurofibromatosis type 1 (NF1) who have symptomatic, inoperable plexiform neurofibromas (PN)	2020-04-10
4	Luspatercept	Reblozyl	2013-03-18	Treatment of myelodysplastic syndrome	Designated/Approved	Approved for Orphan Indication	REBLOZYL is indicated for the treatment of anemia failing an erythropoiesis stimulating agent and requiring 2 or more red blood cell units over 8 weeks in adult patients with very low- to intermediate-risk myelodysplastic syndromes with ring sideroblasts (MDS-RS) or with myelodysplastic/myeloproliferative neoplasm with ring sideroblasts and thrombocytosis (MDS/MPN-RS-T).	2020-04-03
5	durvalumab	Imfinzi	2019-07-10	Treatment of small cell lung cancer	Designated/Approved	Approved for Orphan Indication	IMFINZI is indicated for use, in combination with etoposide and either carboplatin or cisplatin, for the first-line treatment of adult patients with extensive-stage small cell lung cancer (ES-SCLC).	2020-03-27
6	sofosbuvir/velpatasvir	Epclusa	2017-02-22	Treatment of pediatric chronic hepatitis C virus (HCV) infection	Designated/Approved	Approved for Orphan Indication	EPCLUSA is indicated for the treatment of adults and pediatric patients 6 years of age and older or weighing at least 17 kg with chronic hepatitis C virus (HCV) genotype 1, 2, 3, 4, 5, or 6 infection: without cirrhosis or with compensated cirrhosis; or with decompensated cirrhosis for use in combination with ribavirin.	2020-03-19
7	osilodrostat	Isturisa	2013-09-13	Treatment of Cushing's disease	Designated/Approved	Approved for Orphan Indication	ISTURISA is a cortisol synthesis inhibitor indicated for the treatment of adult patients with Cushing’s disease for whom pituitary surgery is not an option or has not been curative.	2020-03-06
8	isatuximab	n/a	2014-05-22	Treatment of multiple myeloma	Designated/Approved	Approved for Orphan Indication	SARCLISA is indicated, in combination with pomalidomide and dexamethasone, for the treatment of adult patients with multiple myeloma who have received at least two prior therapies including lenalidomide and a proteasome inhibitor.	2020-03-02
9	cysteamine enteric coated	Procysbi	2006-10-24	Treatment of cystinosis	Designated/Approved	Approved for Orphan Indication	PROCYSBI is indicated for the treatment of nephropathic cystinosis in adults and pediatric patients 1 year of age and older.	2020-02-14
10	fidaxomicin	Dificid	2010-12-13	Treatment of pediatric Clostridium difficile infection	Designated/Approved	Approved for Orphan Indication	DIFICID® is indicated in adult and pediatric patients aged 6 months and older for the treatment of C. difficile-associated diarrhea (CDAD).	2020-01-24
11	tazemetostat	n/a	2017-06-15	Treatment of soft tissue sarcoma	Designated/Approved	Approved for Orphan Indication	TAZVERIK is indicated for the treatment of adults and pediatric patients aged 16 years and older with metastatic or locally advanced epithelioid sarcoma not eligible for complete resection.	2020-01-23
12	teprotumumab	n/a	2013-05-06	Treatment of active thyroid eye disease	Designated/Approved	Approved for Orphan Indication	TEPEZZA is indicated for the treatment of Thyroid Eye Disease.	2020-01-21
13	diazepam (intranasal)	Valtoco	2015-11-16	Management of acute repetitive seizures	Designated/Approved	Approved for Orphan Indication	Acute treatment of intermittent, stereotypic episodes of frequent seizure activity (i.e., seizure clusters, acute repetitive seizures) that are distinct from a patient’s usual seizure pattern in patients with epilepsy 6 years of age and older.	2020-01-10
14	avapritinib	Ayvakit	2016-01-06	Treatment of gastrointestinal stromal tumors	Designated/Approved	Approved for Orphan Indication	AYVAKIT is indicated for the treatment of adults with unresectable or metastatic GIST harboring a platelet-derived growth factor receptor alpha (PDGFRA) exon 18 mutation, including PDGFRA D842V mutations	2020-01-09
15	olaparib	Lynparza	2018-10-11	Treatment of pancreatic cancer	Designated/Approved	Approved for Orphan Indication	Lynparza is indicated for the maintenance treatment of adult patients with deleterious or suspected deleterious gBRCAm metastatic pancreatic adenocarcinoma whose disease has not progressed on at least 16 weeks of a first-line platinum-based chemotherapy regimen. Select patients for therapy based on an FDA-approved companion diagnostic for Lynparza.	2019-12-27
16	Brilliant Blue G Ophthalmic Solution 0.025%	Dorc Ilm-Blue	2012-07-31	For use as an aid in ophthalmic surgery by selectively staining the internal limiting membrane	Designated/Approved	Approved for Orphan Indication	TissueBlue (Brilliant Blue G Ophthalmic Solution) 0.025% is indicated to selectively stain the internal limiting membrane (ILM).	2019-12-20
17	nitric oxide	n/a	2012-06-18	Treatment of persistent pulmonary hypertension in newborns	Designated/Approved	Approved for Orphan Indication	GENOSYL® is indicated to improve oxygenation and reduce the need for extracorporeal membrane oxygenation in term and near-term (>34 weeks gestation) neonates with hypoxic respiratory failure associated with clinical or echocardiographic evidence of pulmonary hypertension in conjunction with ventilatory support and other appropriate agents.	2019-12-20
18	riluzole oral suspension	Tiglutik	2016-09-15	Treatment of amyotrophic lateral sclerosis (ALS).	Designated/Approved	Approved for Orphan Indication	TIGLUTIK is indicated for the treatment of amyotrophic lateral sclerosis (ALS).	2019-12-13
19	golodirsen	Vyondys 53	2018-05-22	Treatment of Duchenne muscular dystrophy (DMD)	Designated/Approved	Approved for Orphan Indication	VYONDYS 53 is indicated for the treatment of Duchenne muscular dystrophy (DMD) in patients who have a confirmed mutation of the DMD gene that is amenable to exon 53 skipping.	2019-12-12
20	Voxelotor	Oxbryta	2015-12-29	Treatment of sickle cell disease (SCD).	Designated/Approved	Approved for Orphan Indication	OXBRYTA is indicated for the treatment of sickle cell disease (SCD) in adults and pediatric patients 12 years of age and older.	2019-11-25
21	riluzole oral film	Exservan	2018-01-23	Treatment of amyotrophic lateral sclerosis (ALS)	Designated/Approved	Approved for Orphan Indication	EXSERVAN is indicated for the treatment of amyotrophic lateral sclerosis (ALS).	2019-11-22
22	acalabrutinib	n/a	2015-05-13	Treatment of chronic lymphocytic leukemia (CLL).	Designated/Approved	Approved for Orphan Indication	CALQUENCE is indicated for the treatment of adult patients with chronic lymphocytic leukemia (CLL) or small lymphocytic lymphoma (SLL).	2019-11-21
23	givosiran	Givlaari	2016-08-29	Treatment of acute hepatic porphyria	Designated/Approved	Approved for Orphan Indication	GIVLAARI is indicated for the treatment of adults with acute hepatic porphyria (AHP).	2019-11-20
24	crizanlizumab	Adakveo	2008-07-22	Treatment of sickle cell disease	Designated/Approved	Approved for Orphan Indication	ADAKVEO® is indicated to reduce the frequency of vasoocclusive crises (VOCs) in adults and pediatric patients aged 16 years and older with sickle cell disease.	2019-11-15
25	zanubrutinib	Brukinsa	2016-06-23	Treatment of mantle cell lymphoma	Designated/Approved	Approved for Orphan Indication	BRUKINSA is indicated for the treatment of adult patients with mantle cell lymphoma (MCL) who have received at least one prior therapy.	2019-11-14
26	Luspatercept-aamt	Reblozyl	2013-03-11	Treatment of B-thalassemia	Designated/Approved	Approved for Orphan Indication	REBLOZYL is indicated for the treatment of anemia in adult patients with beta thalassemia who require regular red blood cell (RBC) transfusions.	2019-11-08
27	niraparib	Zejula	2010-04-30	Treatment of ovarian cancer	Designated/Approved	Approved for Orphan Indication	ZEJULA® is indicated for the treatment of adult patients with advanced ovarian, fallopian tube, or primary peritoneal cancer who have been treated with three or more prior chemotherapy regimens and whose cancer is associated with homologous recombination deficiency (HRD) positive status defined by either, (1) a deleterious or suspected deleterious BRCA mutation, or (2) genomic instability and who…	2019-10-23
28	elexacaftor/tezacaftor/ivacaftor	Trikafta	2018-08-29	Treatment of Cystic Fibrosis	Designated/Approved	Approved for Orphan Indication	TRIKAFTA is indicated for the treatment of cystic fibrosis (CF) in patients aged 12 years and older who have at least one F508del mutation in the cystic fibrosis transmembrane conductance regulator (CFTR) gene	2019-10-21
29	treprostinil	Remodulin;Orenitram	1997-06-04	Treatment of pulmonary arterial hypertension.	Designated/Approved	Approved for Orphan Indication	Orenitram is indicated for the treatment of pulmonary arterial hypertension (PAH) (WHO Group 1) to delay disease progression and to improve exercise capacity.	2019-10-18
30	romiplostim	Nplate	2003-03-27	Treatment of immune thrombocytopenic purpura	Designated/Approved	Approved for Orphan Indication	Nplate is indicated for the treatment of thrombocytopenia in adult patients with immune thrombocytopenia (ITP) who have had an insufficient response to corticosteroids, immunoglobulins, or splenectomy	2019-10-17
31	afamelanotide	Scenesse®	2008-07-17	Treatment of erythropoietic porphyrias	Designated/Approved	Approved for Orphan Indication	SCENESSE® is indicated to increase pain free light exposure in adult patients with a history of phototoxic reactions from erythropoietic protoporphyria (EPP)	2019-10-08
32	cobicistat	Tybost®	2017-06-15	Treatment of human immunodeficiency virus type 1 (HIV-1) infection in pediatric patients	Designated/Approved	Approved for Orphan Indication	TYBOST is a CYP3A inhibitor indicated to increase systemic exposure of atazanavir or darunavir (once daily dosing regimen) in combination with other antiretroviral agents in the treatment of HIV-1 infection in pediatric patients weighing at least 35 kg coadminstered with atazanavir or weighing at least 40 kg coadministered with darunavir.	2019-10-03
33	dexamethasone	n/a	2018-03-26	Treatment of multiple myeloma (MM)	Designated/Approved	Approved for Orphan Indication	HEMADY is indicated in combination with other anti-myeloma products for the treatment of adults with multiple myeloma	2019-10-03
34	rituximab	Rituxan	2006-02-14	Treatment of patients with anti-neutrophil cytoplasmic antibody-associated vasculitis (Wegener's Granulomatosis, Microscopic Polyangiitis, and Churg-Strauss Syndrome)	Designated/Approved	Approved for Orphan Indication	RITUXAN, in combination with glucocorticoids, is indicated for the treatment of adult and pediatric patients 2 years of age and older with Granulomatosis with Polyangiitis (GPA) (Wegener’s Granulomatosis) and Microscopic Polyangiitis (MPA)	2019-09-27
35	burosumab-twza	Crysvita	2009-12-14	Treatment of X-linked hypophosphatemia (formerly known as vitamin D-resistant rickets)	Designated/Approved	Approved for Orphan Indication	CRYSVITA is indicated for the treatment of X-linked hypophosphatemia (XLH) in adult and pediatric patients 6 months of age and older.	2019-09-27
36	daratumumab	Darzalex	2013-05-06	Treatment of multiple myeloma	Designated/Approved	Approved for Orphan Indication	Treatment of adult patients with multiple myeloma in combination with lenalidomide and dexamethasone in newly diagnosed patients who are ineligible for autologous stem cell transplant (ASCT) and in patients with relapsed or refractory multiple myeloma who have received at least 1 prior therapy; in combination with bortezomib, melphalan and prednisone in newly diagnosed patients who are ineligible…	2019-09-26
37	baclofen	Ozobax	1991-12-16	Treatment of intractable spasticity due to multiple sclerosis or spinal cord injury.	Designated/Approved	Approved for Orphan Indication	OZOBAX is indicated for the treatment of spasticity resulting from multiple sclerosis, particularly for the relief of flexor spasms and concomitant pain, clonus, and muscular rigidity.	2019-09-18
38	nintedanib	Ofev	2016-07-06	Treatment of systemic sclerosis (including the associated interstitial lung disease).	Designated/Approved	Approved for Orphan Indication	OFEV is indicated to slow the rate of decline in pulmonary function in patients with systemic sclerosis associated interstitial lung disease (SSc-ILD).	2019-09-06
39	ledipasvir/sofosbuvir	Harvoni	2016-10-12	Treatment of chronic hepatitis C virus (HCV) infection in pediatric patients	Designated/Approved	Approved for Orphan Indication	HARVONI is indicated for the treatment of adults and pediatric patients 3 years of age and older with chronic hepatitis C virus (HCV) genotype 1, 4, 5, or 6 infection without cirrhosis or with compensated cirrhosis, genotype 1 infection with decompensated cirrhosis, for use in combination with ribavirin, and genotype 1 or 4 infection who are liver transplant recipients without cirrhosis or with c…	2019-08-28
40	ledipasvir/sofosbuvir	Harvoni	2016-10-12	Treatment of chronic hepatitis C virus (HCV) infection in pediatric patients	Designated/Approved	Approved for Orphan Indication	HARVONI is indicated for the treatment of adults and pediatric patients 3 years of age and older with chronic hepatitis C virus (HCV) genotype 1, 4, 5, or 6 infection without cirrhosis or with compensated cirrhosis, genotype 1 infection with decompensated cirrhosis, for use in combination with ribavirin, and genotype 1 or 4 infection who are liver transplant recipients without cirrhosis or with c…	2019-08-28
41	sofosbuvir	Sovaldi	2016-10-25	Treatment of pediatric chronic hepatitis C virus infection	Designated/Approved	Approved for Orphan Indication	SOVALDI is indicated for the treatment of chronic HCV genotype 2 or 3 infection in pediatric patients 3 years of age and older without cirrhosis or with compensated cirrhosis for use in combination with ribavirin	2019-08-28
42	sofosbuvir	Sovaldi	2016-10-25	Treatment of pediatric chronic hepatitis C virus infection	Designated/Approved	Approved for Orphan Indication	SOVALDI is indicated for the treatment of chronic HCV genotype 2 or 3 infection in pediatric patients 3 years of age and older without cirrhosis or with compensated cirrhosis for use in combination with ribavirin	2019-08-28
43	cobicistat	Tybost®	2017-06-15	Treatment of human immunodeficiency virus type 1 (HIV-1) infection in pediatric patients	Designated/Approved	Approved for Orphan Indication	TYBOST is a CYP3A inhibitor indicated to increase systemic exposure of atazanavir in combination with other antiretroviral agents in the treatment of HIV-1 infection in pediatric patients weighing at least 35 kg	2019-08-22
44	Gallium-68 (DOTA0-Phel-Tyr3)octreotide	n/a	2013-10-25	The management of neuroendocrine tumors	Designated/Approved	Approved for Orphan Indication	Ga 68 DOTATOC Injection is indicated for use with positron emission tomography (PET) for the localization of somatostatin receptor positive neuroendocrine tumors (NETs) in adult and pediatric patients.	2019-08-21
45	Fedratinib	Inrebic	2009-05-18	Treatment of secondary and primary myelofibrosis	Designated/Approved	Approved for Orphan Indication	INREBIC® is indicated for the treatment of adult patients with intermediate-2 or high-risk primary or secondary (post-polycythemia vera or post-essential thrombocythemia) myelofibrosis (MF).	2019-08-16
46	entrectinib	Rozlytrek	2015-02-03	Treatment of TrkA-positive, TrkB-positive, TrkC-positive ROS1-positive or ALK-positive non-small cell lung cancer	Designated/Approved	Approved for Orphan Indication	ROZLYTREK is indicated for the treatment of adult patients with metastatic non-small cell lung cancer (NSCLC) whose tumors are ROS1-positive.	2019-08-15
47	entrectinib	Rozlytrek	2017-07-05	Treatment of NTRK fusion-positive solid tumors	Designated/Approved	Approved for Orphan Indication	ROZLYTREK is indicated for the treatment of adult and pediatric patients 12 years of age and older with solid tumors that have a neurotrophic tyrosine receptor kinase (NTRK) gene fusion without a known acquired resistance mutation, are metastatic or where surgical resection is likely to result in severe morbidity, and have either progressed following treatment or have no satisfactory alternative …	2019-08-15
48	Pretomanid	Pretomanid	2007-07-05	Treatment of tuberculosis	Designated/Approved	Approved for Orphan Indication	Pretomanid tablet is indicated, as part of a combination regimen with bedaquiline and linezolid for the treatment of adults with pulmonary extensively drug resistant (XDR) or treatment-intolerant or nonresponsive multidrug-resistant (MDR) tuberculosis (TB).	2019-08-14
49	Pitolisant	Wakix	2010-05-17	Treatment of narcolepsy	Designated/Approved	Approved for Orphan Indication	WAKIX is indicated for the treatment of excessive daytime sleepiness (EDS) in adult patients with narcolepsy	2019-08-14
50	bedaquiline	Sirturo	2005-01-10	Treatment of active tuberculosis	Designated/Approved	Approved for Orphan Indication	SIRTURO is a diarylquinoline antimycobacterial drug indicated as part of combination therapy in the treatment of adult and pediatric patients (12 to less than 18 years of age and weighing at least 30 kg) with pulmonary multi-drug resistant tuberculosis (MDR-TB). Reserve SIRTURO for use when an effective treatment regimen cannot otherwise be provided.	2019-08-09
51	pexidartinib	Turalio	2014-02-14	Treatment of pigmented villonodular synovitis/giant cell tumor of the tendon sheath	Designated/Approved	Approved for Orphan Indication	TURALIO is indicated for the treatment of adult patients with symptomatic tenosynovial giant cell tumor (TGCT) associated with severe morbidity or functional limitations and not amenable to improvement with surgery.	2019-08-02
52	pembrolizumab	Keytruda	2017-06-15	Treatment of esophageal carcinoma	Designated/Approved	Approved for Orphan Indication	KEYTRUDA is indicated for the treatment of patients with recurrent locally advanced or metastatic squamous cell carcinoma of the esophagus whose tumors express PD-L1 (CPS =10) as determined by an FDA-approved test, with disease progression after one or more prior lines of systemic therapy.	2019-07-30
53	apremilast	Otezla®	2013-01-17	Treatment of Behcet's disease	Designated/Approved	Approved for Orphan Indication	OTEZLA is indicated for the treatment of adult patients with oral ulcers associated with Behçet’s Disease.	2019-07-19
54	selinexor	Xpovio	2015-01-05	Treatment of multiple myeloma	Designated/Approved	Approved for Orphan Indication	XPOVIO is indicated in combination with dexamethasone for the treatment of adult patients with relapsed or refractory multiple myeloma (RRMM) who have received at least four prior therapies and whose disease is refractory to at least two proteasome inhibitors, at least two immunomodulatory agents, and an anti-CD38 monoclonal antibody.	2019-07-03
55	Tiopronin	Thiola	1986-01-17	Prevention of cystine nephrolithiasis in patients with homozygous cystinuria.	Designated/Approved	Approved for Orphan Indication	THIOLA EC is indicated, in combination with high fluid intake, alkali, and diet modification, for the prevention of cystine stone formation in adults and pediatric patients 20 kg and greater with severe homozygous cystinuria, who are not responsive to these measures alone.	2019-06-28
56	Tiopronin	Thiola	1986-01-17	Prevention of cystine nephrolithiasis in patients with homozygous cystinuria.	Designated/Approved	Approved for Orphan Indication	THIOLA is indicated, in combination with high fluid intake, alkali, and diet modification, for the prevention of cystine stone formation in adults and pediatric patients 20 kg and greater with severe homozygous cystinuria, who are not responsive to these measures alone.	2019-06-28
57	daratumumab	Darzalex	2013-05-06	Treatment of multiple myeloma	Designated/Approved	Approved for Orphan Indication	DARZALEX is indicated for the treatment of adult patients with multiple myeloma in combination with lenalidomide and dexamethasone in newly diagnosed patients who are ineligible for autologous stem cell transplant and in patients with relapsed or refractory multiple myeloma who have received at least one prior therapy.	2019-06-27
58	eculizumab	Soliris	2013-06-24	Treatment of neuromyelitis optica	Designated/Approved	Approved for Orphan Indication	Soliris is indicated for the treatment of neuromyelitis optica spectrum disorder (NMOSD) in adult patients who are anti-aquaporin-4 (AQP4) antibody positive.	2019-06-27
59	avatrombopag maleate	n/a	2011-09-01	Treatment of idiopathic thrombocytopenic purpura	Designated/Approved	Approved for Orphan Indication	DOPTELET is indicated for the treatment of thrombocytopenia in adult patients with chronic immune thrombocytopenia who have had an insufficient response to a previous treatment	2019-06-26
60	Tezacaftor and Ivacaftor combination therapy	Symdeko	2017-06-15	Treatment of cystic fibrosis (CF)	Designated/Approved	Approved for Orphan Indication	SYMDEKO® is indicated for the treatment of patients with cystic fibrosis (CF) age 6 years and older who are homozygous for the F508del mutation or who have at least one mutation in the cystic fibrosis transmembrane conductance regulator (CFTR) gene that is responsive to tezacaftor/ivacaftor based on in vitro data and/or clinical evidence.	2019-06-21
61	botulinum toxin type A	Botox	1991-12-06	Treatment of dynamic muscle contracture in pediatric cerebral palsy patients	Designated/Approved	Approved for Orphan Indication	BOTOX is indicated for the treatment of upper limb spasticity in pediatric patients 2 to 17 years of age.	2019-06-20
62	bictegravir/emtricitabine/tenofovir disoproxil fumarate	Biktarvy	2017-05-17	Treatment of Human Immunodeficiency Virus type 1 infection in pediatric patients	Designated/Approved	Approved for Orphan Indication	BIKTARVY® is indicated as a complete regimen for the treatment of human immunodeficiency virus type 1 (HIV-1) infection in adults and pediatric patients weighing at least 25 kg who have no antiretroviral treatment history or to replace the current antiretroviral regimen in those who are virologically-suppressed (HIV-1 RNA less than 50 copies per mL) on a stable antiretroviral with no history of t…	2019-06-18
63	Solriamfetol	Sunosi	2012-08-20	Treatment of narcolepsy	Designated/Approved	Approved for Orphan Indication	SUNOSI is indicated to improve wakefulness in adult patients with excessive daytime sleepiness associated with narcolepsy	2019-06-17
64	pembrolizumab	Keytruda	2017-10-03	Treatment of Small Cell Lung Cancer	Designated/Approved	Approved for Orphan Indication	KEYTRUDA is indicated for the treatment of patients with metastatic small cell lung cancer (SCLC) with disease progression on or after platinum-based chemotherapy and at least one other prior line of therapy.	2019-06-17
65	polatuzumab vedotin-piiq	Polivy	2016-12-12	Treatment of diffuse large B-cell lymphoma	Designated/Approved	Approved for Orphan Indication	POLIVY in combination with bendamustine and a rituximab product is indicated for the treatment of adult patients with relapsed or refractory diffuse large B-cell lymphoma (DLBCL), not otherwise specified, after at least two prior therapies.	2019-06-10
66	deflazacort	Emflaza	2013-08-16	Treatment of Duchenne muscular dystrophy	Designated/Approved	Approved for Orphan Indication	EMFLAZA is indicated for the treatment of Duchenne muscular dystrophy (DMD) in patients 2 years of age and older.	2019-06-07
67	mepolizumab	Nucala	2011-07-14	Treatment of Churg-Strauss Syndrome	Designated/Approved	Approved for Orphan Indication	NUCALA prefilled autoinjector and single syringe device is indicated for the treatment of adult patients with eosinophilic granulomatosis with polyangiitis (EGPA).	2019-06-06
68	lenalidomide	Revlimid	2013-09-17	Treatment of follicular lymphoma	Designated/Approved	Approved for Orphan Indication	REVLIMID in combination with a rituximab product, is indicated for the treatment of adult patients with previously treated follicular lymphoma (FL).	2019-05-28
69	lenalidomide	Revlimid	2017-01-04	Treatment of splenic marginal zone lymphoma	Designated/Approved	Approved for Orphan Indication	REVLIMID in combination with a rituximab product, is indicated for the treatment of adult patients with previously treated marginal zone lymphoma (MZL).	2019-05-28
70	lenalidomide	Revlimid	2017-01-04	Treatment of nodal marginal zone lymphoma	Designated/Approved	Approved for Orphan Indication	REVLIMID in combination with a rituximab product, is indicated for the treatment of adult patients with previously treated marginal zone lymphoma (MZL).	2019-05-28
71	lenalidomide	Revlimid	2015-04-29	Treatment of extranodal marginal zone lymphoma of mucosa-associated lymphoid tissue	Designated/Approved	Approved for Orphan Indication	REVLIMID in combination with a rituximab product, is indicated for the treatment of adult patients with previously treated marginal zone lymphoma (MZL).	2019-05-28
72	onasemnogene abeparvovec	Zolgensma	2014-09-30	Treatment of spinal muscular atrophy	Designated/Approved	Approved for Orphan Indication	Indicated for the treatment of pediatric patients less than 2 years of age with spinal muscular atrophy (SMA) with bi-allelic mutations in the survival motor neuron 1 (SMN1) gene.	2019-05-24
73	ruxolitinib	Jakafi	2016-11-03	Treatment of graft versus host disease	Designated/Approved	Approved for Orphan Indication	Treatment of steroid-refractory acute graft-versus-host disease (GVHD) in adult and pediatric patients 12 years and older.	2019-05-24
74	midazolam	Nayzilam	2009-10-20	Rescue treatment of seizures in patients who require control of intermittent bouts of increased seizure activity (e.g. acute repetitive seizures, seizure clusters)	Designated/Approved	Approved for Orphan Indication	NAYZILAM is indicated for the acute treatment of intermittent, stereotypic episodes of frequent seizure activity (i.e., seizure clusters, acute repetitive seizures) that are distinct from a patient’s usual seizure pattern in patients with epilepsy 12 years of age and older.	2019-05-17
75	teduglutide [rDNA origin]	Gattex	2000-06-29	Treatment of short bowel syndrome.	Designated/Approved	Approved for Orphan Indication	GATTEX® is indicated for the treatment of adults and pediatric patients 1 year of age and older with Short Bowel Syndrome (SBS) who are dependent on parenteral support.	2019-05-16
76	venetoclax	Venclexta	2012-09-20	Treatment of chronic lymphocytic leukemia	Designated/Approved	Approved for Orphan Indication	VENCLEXTA is indicated for the treatment of adult patients with chronic lymphocytic leukemia (CLL) or small lymphocytic lymphoma (SLL).	2019-05-15
77	ramucirumab	Cyramza	2011-11-04	Treatment of hepatocellular carcinoma	Designated/Approved	Approved for Orphan Indication	CYRAMZA, as a single agent, is indicated for the treatment of patients with hepatocellular carcinoma (HCC) who have an alpha fetoprotein (AFP) of >=400 ng/mL and have been treated with sorafenib.	2019-05-10
78	amifampridine	Ruzurgi	1990-12-18	Treatment of Lambert-Eaton myasthenic syndrome.	Designated/Approved	Approved for Orphan Indication	RUZURGI is indicated for the treatment of Lambert-Eaton myasthenic syndrome (LEMS) in patients 6 to less than 17 years of age.	2019-05-06
79	tafamidis meglumine	Vyndaqel; Vyndamax	2012-02-17	Treatment of symptomatic transthyretin (TTR) amyloid cardiomyopathy.	Designated/Approved	Approved for Orphan Indication	VYNDAQEL and VYNDAMAX are indicated for the treatment of the cardiomyopathy of wild type or hereditary transthyretin-mediated amyloidosis (ATTR-CM) in adults to reduce cardiovascular mortality and cardiovascular-related hospitalization.	2019-05-03
80	ivosidenib	Tibsovo	2015-06-09	Treatment of acute myeloid leukemia (AML)	Designated/Approved	Approved for Orphan Indication	TIBSOVO is indicated for the treatment of newly-diagnosed acute myeloid leukemia (AML) with a susceptible isocitrate dehydrogenase-1 (IDH1) mutation as detected by an FDA-approved test in adult patients who are >= 75 years old or who have comorbidities that preclude use of intensive induction chemotherapy.	2019-05-02
81	glecaprevir and pibrentasvir	Mavyret	2017-01-09	Treatment of pediatric patients with chronic hepatitis C virus infection	Designated/Approved	Approved for Orphan Indication	MAVYRET is indicated for the treatment of adult and pediatric patients 12 years and older or weighing at least 45 kg with chronic hepatitis C virus (HCV) genotype 1, 2, 3, 4, 5 or 6 infection without cirrhosis or with compensated cirrhosis (Child-Pugh A). MAVYRET is also indicated for the treatment of adult and pediatric patients 12 years and older or weighing at least 45 kg with HCV genotype 1 i…	2019-04-30
82	ivacaftor	Kalydeco	2006-12-20	Treatment of patients with cystic fibrosis	Designated/Approved	Approved for Orphan Indication	KALYDECO is a cystic fibrosis transmembrane conductance regulator (CFTR) potentiator indicated for the treatment of cystic fibrosis (CF) in patients age 6 months and older who have one mutation in the CFTR gene that is responsive to ivacaftor potentiation based on clinical and/or in vitro assay data	2019-04-29
83	ivabradine	Corlanor	2016-03-23	Treatment of pediatric patients (0 through 16 years of age) with dilated cardiomyopathy.	Designated/Approved	Approved for Orphan Indication	Corlanor is indicated for the treatment of stable symptomatic heart failure due to dilated cardiomyopathy (DCM) in pediatric patients aged 6 months and older, who are in sinus rhythm with an elevated heart rate.	2019-04-22
84	acyclovir	Avaclyr	2010-12-13	Treatment of acute herpetic keratitis caused by Herpes Simplex Virus type 1 and 2	Designated/Approved	Approved for Orphan Indication	AVACLYR is a sterile topical antiviral indicated for the treatment of acute herpetic keratitis (dendritic ulcers) in patients with herpes simplex (HSV-1 and HSV-2) virus.	2019-03-29
85	atezolizumab	Tecentriq	2016-10-13	Treatment of small cell lung cancer (SCLC)	Designated/Approved	Approved for Orphan Indication	TECENTRIQ®, in combination with carboplatin and etoposide, is indicated for the first-line treatment of adult patients with extensive-stage small cell lung cancer (ES-SCLC)	2019-03-18
86	trifluridine/tipiracil	Lonsurf	2017-04-17	Treatment of gastric cancer including cancer of the gastroesophageal junction	Designated/Approved	Approved for Orphan Indication	LONSURF is indicated for the treatment of adult patients with metastatic gastric or gastroesophageal junction adenocarcinoma previously treated with at least two prior lines of chemotherapy that included a fluoropyrimidine, a platinum, either a taxane or irinotecan, and if appropriate, HER2/neu-targeted therapy.	2019-02-22
87	pembrolizumab	Keytruda	2012-11-19	Treatment of Stage IIB through IV malignant melanoma	Designated/Approved	Approved for Orphan Indication	KEYTRUDA is indicated for the adjuvant treatment of patients with melanoma with involvement of lymph node(s) following complete resection.	2019-02-15
88	triclabendazole	Egaten	2017-04-17	Treatment of fascioliasis	Designated/Approved	Approved for Orphan Indication	EGATEN™ is indicated for the treatment of fascioliasis in patients 6 years of age and older.	2019-02-13
89	Caplacizumab	Cablivi	2009-04-14	Treatment of thrombotic thrombocytopenic purpura	Designated/Approved	Approved for Orphan Indication	CABLIVI is indicated for the treatment of adult patients with acquired thrombotic thrombocytopenic purpura (aTTP), in combination with plasma exchange and immunosuppressive therapy.	2019-02-06
90	cabozantinib	Cabometyx	2017-03-02	Treatment of hepatocellular carcinoma.	Designated/Approved	Approved for Orphan Indication	CABOMETYX is indicated for the treatment of patients with hepatocellular carcinoma (HCC) who have been previously treated with sorafenib.	2019-01-14
91	Dasatinib	Sprycel	2005-11-18	Treatment of Philadelphia-positive acute lymphoblastic leukemia	Designated/Approved	Approved for Orphan Indication	SPRYCEL (dasatinib) is indicated for the treatment of pediatric patients 1 year of age and older with newly diagnosed Ph+ ALL in combination with chemotherapy.	2018-12-21
92	Tagraxofusp-erzs	Elzonris	2013-06-06	Treatment of blastic plasmacytoid dendritic cell neoplasm	Designated/Approved	Approved for Orphan Indication	ELZONRIS is a CD123-directed cytotoxin for the treatment of blastic plasmacytoid dendritic cell neoplasm (BPDCN) in adults and in pediatric patients 2 years and older.	2018-12-21
93	Ravulizumab-cwvz	Ultomiris	2017-01-04	Treatment of paroxysmal nocturnal hemoglobinuria	Designated/Approved	Approved for Orphan Indication	ULTOMIRIS is indicated for the treatment of adult patients with paroxysmal nocturnal hemoglobinuria (PNH).	2018-12-21
94	Pegaspargase	Oncaspar; Asparlas	1989-10-20	Treatment of acute lymphocytic leukemia.	Designated/Approved	Approved for Orphan Indication	ASPARLAS is indicated as a component of a multi-agent chemotherapeutic regimen for the treatment of acute lymphoblastic leukemia in pediatric and young adult patients age 1 month to 21 years.	2018-12-20
95	tacrolimus	Envarsus Xr	2013-12-20	Prophylaxis of organ rejection in patients receiving allogeneic kidney transplant	Designated/Approved	Approved for Orphan Indication	ENVARSUS XR is indicated for the prophylaxis of organ rejection in kidney transplant patients in combination with other immunosuppressants.	2018-12-19
96	olaparib	Lynparza	2013-10-16	Treatment of ovarian cancer	Designated/Approved	Approved for Orphan Indication	Lynparza® is indicated for the maintenance treatment of adult patients with deleterious or suspected deleterious germline or somatic BRCA-mutated (gBRCAm or sBRCAm) advanced epithelial ovarian, fallopian tube or primary peritoneal cancer who are in complete or partial response to first-line platinum based chemotherapy. Select patients with gBRCAm advanced epithelial ovarian, fallopian tube or pri…	2018-12-19
97	olaparib	Lynparza	2018-05-15	Treatment of Fallopian Tube Cancer	Designated/Approved	Approved for Orphan Indication	Lynparza® is indicated for the maintenance treatment of adult patients with deleterious or suspected deleterious germline or somatic BRCA-mutated (gBRCAm or sBRCAm) advanced epithelial ovarian, fallopian tube or primary peritoneal cancer who are in complete or partial response to first-line platinum based chemotherapy. Select patients with gBRCAm advanced epithelial ovarian, fallopian tube or pri…	2018-12-19
98	olaparib	Lynparza	2018-05-15	Treatment of primary peritoneal cancer	Designated/Approved	Approved for Orphan Indication	Lynparza® is indicated for the maintenance treatment of adult patients with deleterious or suspected deleterious germline or somatic BRCA-mutated (gBRCAm or sBRCAm) advanced epithelial ovarian, fallopian tube or primary peritoneal cancer who are in complete or partial response to first-line platinum based chemotherapy. Select patients with gBRCAm advanced epithelial ovarian, fallopian tube or pri…	2018-12-19
99	pembrolizumab	Keytruda	2016-12-28	Treatment of Merkel cell carcinoma	Designated/Approved	Approved for Orphan Indication	KEYTRUDA is indicated for the treatment of adult and pediatric patients with recurrent locally advanced or metastatic Merkel cell carcinoma	2018-12-19
100	romiplostim	Nplate	2003-03-27	Treatment of immune thrombocytopenic purpura	Designated/Approved	Approved for Orphan Indication	Nplate is indicated for the treatment of thrombocytopenia in pediatric patients 1 year of age and older with ITP for at least 6 months who have had an insufficient response to corticosteroids, immunoglobulins, or splenectomy.	2018-12-14
101	amifampridine phosphate	Firdapse	2009-11-12	Treatment of Lambert-Eaton Myasthenic Syndrome	Designated/Approved	Approved for Orphan Indication	FIRDAPSE® is indicated for the treatment of Lambert-Eaton myasthenic syndrome (LEMS) in adults.	2018-11-28
102	gilteritinib	Xospata	2017-07-13	Treatment of acute myeloid leukemia (AML)	Designated/Approved	Approved for Orphan Indication	XOSPATA is indicated for the treatment of adult patients who have relapsed or refractory acute myeloid leukemia (AML) with a FMS-like tyrosine kinase 3 (FLT3) mutation as detected by an FDA-approved test.	2018-11-28
103	larotrectinib	Vitrakvi	2017-05-09	Treatment of solid tumors with NTRK-fusion proteins	Designated/Approved	Approved for Orphan Indication	VITRAKVI® is indicated for the treatment of adult and pediatric patients with solid tumors that have a neurotrophic receptor tyrosine kinase (NTRK) gene fusion without a known acquired resistance mutation; are metastatic or where surgical resection is likely to result in severe morbidity; and have no satisfactory alternative treatments or that have progressed following treatment.	2018-11-26
104	venetoclax	Venclexta	2016-02-04	Treatment of acute myeloid leukemia.	Designated/Approved	Approved for Orphan Indication	VENCLEXTA is indicated in combination with azacitidine, or decitabine, or low-dose cytarabine for the treatment of newly-diagnosed acute myeloid leukemia (AML) in adults who are age 75 years or older, or who have comorbidities that preclude use of intensive induction chemotherapy.	2018-11-21
105	Glasdegib	Daurismo	2017-06-28	Treatment of acute myeloid leukemia (AML)	Designated/Approved	Approved for Orphan Indication	DAURISMO is indicated, in combination with low-dose cytarabine, for the treatment of newly-diagnosed acute myeloid leukemia (AML) in adult patients who are >75 years old or who have comorbidities that preclude use of intensive induction chemotherapy.	2018-11-21
106	Emapalumab-lzsg	Gamifant™	2010-03-26	Treatment of hemophagocytic lymphohistiocytosis	Designated/Approved	Approved for Orphan Indication	GAMIFANT is indicated for the treatment of adult and pediatric (newborn and older) patients with primary hemophagocytic lymphohistiocytosis (HLH) with refractory, recurrent or progressive disease or intolerance with conventional HLH therapy.	2018-11-20
107	brentuximab vedotin	Adcetris	2008-10-23	Treatment of peripheral T-cell lymphoma, including anaplastic large cell lymphoma, peripheral T-cell lymphoma not otherwise specified, angioimmunoblastic T-cell lymphoma, adult T-cell leukemia/lymphoma, enteropathy-associated T-cell lymphoma, and extranodal NK/T-cell lymphoma.	Designated/Approved	Approved for Orphan Indication	ADCETRIS is indicated for the treatment of adult patients with previously untreated sALCL or other CD30-expressing PTCL, including angioimmunoblastic T-cell lymphoma and PTCL not otherwise specified, in combination with cyclophosphamide, doxorubicin, and prednisone	2018-11-16
108	eltrombopag	Promacta	2013-11-08	Treatment of aplastic anemia	Designated/Approved	Approved for Orphan Indication	PROMACTA is indicated in combination with standard immunosuppressive therapy for the first-line treatment of adult and pediatric patients 2 years and older with severe aplastic anemia.	2018-11-16
109	pembrolizumab	Keytruda	2017-06-12	Treatment of hepatocellular carcinoma (HCC)	Designated/Approved	Approved for Orphan Indication	KEYTRUDA is indicated for the treatment of patients with hepatocellular carcinoma (HCC) who have been previously treated with sorafenib	2018-11-09
110	elotuzumab	Empliciti	2011-09-01	Treatment of multiple myeloma	Designated/Approved	Approved for Orphan Indication	EMPLICITI is indicated in combination with pomalidomide and dexamethasone for the treatment of adult patients with multiple myeloma who have received at least two prior therapies including lenalidomide and a proteasome inhibitor.	2018-11-06
111	Lorlatinib	Lorbrena	2015-06-23	Treatment of anaplastic lymphoma kinase (ALK)-positive or ROS1-positive non-small cell lung cancer	Designated/Approved	Approved for Orphan Indication	LORBRENA® is indicated for the treatment of patients with anaplastic lymphoma kinase (ALK)-positive metastatic non-small cell lung cancer (NSCLC) whose disease has progressed on crizotinib and at least one other ALK inhibitor for metastatic disease; or alectinib as the first ALK inhibitor therapy for metastatic disease; or ceritinib as the first ALK inhibitor therapy for metastatic disease.	2018-11-02
112	sodium oxybate	Xyrem	1994-11-07	Treatment of narcolepsy.	Designated/Approved	Approved for Orphan Indication	Xyrem is indicated for the treatment of cataplexy or excessive daytime sleepiness (EDS) in patients 7 years of age and older with narcolepsy.	2018-10-26
113	adalimumab	Humira	2015-05-13	Treatment of moderate to severe hidradenitis suppurativa (Hurley stage 2 and Hurley stage 3 disease)	Designated/Approved	Approved for Orphan Indication	Treatment of moderate to severe hidradenitis suppurativa in patients 12 years of age and older.	2018-10-16
114	Inotersen	Tegsedi™	2012-07-24	Treatment of transthyretin amyloidosis (ATTR amyloidosis)	Designated/Approved	Approved for Orphan Indication	TEGSEDI™ is indicated for the treatment of the polyneuropathy of hereditary transthyretin-mediated amyloidosis in adults.	2018-10-05
115	elapegademase-lvlr	Revcovi	2015-03-19	Treatment of adenosine deaminase deficiency in patients with severe combined immunodeficiency.	Designated/Approved	Approved for Orphan Indication	Treatment of Adenosine Deaminase-Severe Combined Immunodeficiency (ADA-SCID).	2018-10-05
116	emicizumab-kxwh	Hemlibra	2014-01-10	Treatment of hemophilia A	Designated/Approved	Approved for Orphan Indication	HEMLIBRA is indicated for routine prophylaxis to prevent or reduce the frequency of bleeding episodes in adult and pediatric patients ages newborn and older with hemophilia A (congenital factor VIII deficiency) with or without factor VIII inhibitors.	2018-10-04
117	adalimumab	Humira	2014-05-13	Treatment of non-infectious intermediate, posterior, or panuveitis, or chronic non-infectious anterior uveitis	Designated/Approved	Approved for Orphan Indication	Treatment of non-infectious intermediate, posterior, and panuveitis in adults and pediatric patients 2 years of age and older	2018-09-28
118	liposomal amikacin	Arikayce	2013-03-25	Treatment of infections caused by non-tuberculous mycobacteria	Designated/Approved	Approved for Orphan Indication	Treatment of Mycobacterium avium complex (MAC) lung disease as part of a combination antibacterial drug regimen in patients who do not achieve negative sputum cultures after a minimum of 6 consecutive months of a multidrug background regimen therapy	2018-09-28
119	cannabidiol	Epidiolex	2013-11-14	Treatment of Dravet syndrome	Designated/Approved	Approved for Orphan Indication	EPIDIOLEX is indicated for the treatment of seizures associated with Lennox-Gastaut syndrome (LGS) or Dravet syndrome (DS) in patients 2 years of age and older.	2018-09-28
120	cannabidiol	Epidiolex	2014-02-27	Treatment of Lennox-Gastaut syndrome	Designated/Approved	Approved for Orphan Indication	EPIDIOLEX is indicated for the treatment of seizures associated with Lennox-Gastaut syndrome (LGS) or Dravet syndrome (DS) in patients 2 years of age and older.	2018-09-28
121	dacomitinib	Vizimpro	2015-03-03	Treatment of non-small cell lung cancer with EGFR, HER2, HER4, or DDR2 mutations.	Designated/Approved	Approved for Orphan Indication	For the first-line treatment of patients with metastatic non-small-cell lung cancer (NSCLC) with epidermal growth factor receptor (EGFR) exon 19 deletion or exon 21 L858R	2018-09-27
122	duvelisib	Copiktra	2013-04-15	Treatment of chronic lymphocytic leukemia and small lymphocytic lymphoma	Designated/Approved	Approved for Orphan Indication	Treatment of adult patients with relapsed or refractory chronic lymphocytic leukemia (CLL) or small lymphocytic lymphoma (SLL) after at least two prior therapies	2018-09-24
123	duvelisib	Copiktra	2013-08-01	Treatment of follicular lymphoma	Designated/Approved	Approved for Orphan Indication	Treatment of adult patients with relapsed or refractory follicular lymphoma after at least two prior therapies	2018-09-24
124	Coagulation factor X (human)	Coagadex	2007-11-08	Treatment of hereditary factor X deficiency	Designated/Approved	Approved for Orphan Indication	COAGADEX is indicated in adults and children with hereditary Factor X deficiency for routine prophylaxis to reduce the frequency of bleeding episodes; on-demand treatment and control of bleeding episodes; and perioperative management of bleeding in patients with mild and moderate hereditary Factor X deficiency.	2018-09-21
125	midazolam	Seizalam	2016-02-04	Treatment of status epilepticus	Designated/Approved	Approved for Orphan Indication	SEIZALAM is indicated for the treatment of status epilepticus in adults.	2018-09-14
126	moxetumomab pasudotox-tdfk	Lumoxiti	2007-11-15	Treatment of hairy cell leukemia	Designated/Approved	Approved for Orphan Indication	LUMOXITI is indicated for the treatment of adult patients with relapsed or refractory hairy cell leukemia (HCL) who received at least two prior systemic therapies, including treatment with a purine nucleoside analog (PNA).	2018-09-13
127	riluzole oral suspension	Tiglutik	2016-09-15	Treatment of amyotrophic lateral sclerosis (ALS).	Designated/Approved	Approved for Orphan Indication	TIGLUTIK is indicated for the treatment of amyotrophic lateral sclerosis (ALS).	2018-09-05
128	lanadelumab-flyo	Takhzyro	2013-11-26	Treatment of angioedema	Designated/Approved	Approved for Orphan Indication	Prophylaxis to prevent attacks of hereditary angioedema (HAE) in patients 12 years and older	2018-08-23
129	cenegermin-bkbj	Oxervate	2014-06-23	Treatment of neurotrophic keratitis	Designated/Approved	Approved for Orphan Indication	Treatment of neurotrophic keratitis	2018-08-22
130	stiripentol	Diacomit	2008-10-30	Treatment of Dravet syndrome	Designated/Approved	Approved for Orphan Indication	DIACOMIT is indicated for the treatment of seizures associated with Dravet syndrome (DS) in patients 2 years of age and older taking clobazam.	2018-08-20
131	nivolumab	Opdivo	2015-09-15	Treatment of small cell lung cancer.	Designated/Approved	Approved for Orphan Indication	For the treatment of patients with metastatic small cell lung cancer (SCLC) with progression after platinum-based chemotherapy and at least one other line of therapy.	2018-08-16
132	ivacaftor	Kalydeco	2006-12-20	Treatment of patients with cystic fibrosis	Designated/Approved	Approved for Orphan Indication	Treatment of cystic fibrosis (CF) in patients age 12 months and older who have one mutation in the CFTR gene that is responsive to ivacaftor potentiation based on clinical and/or in vitro assay data.	2018-08-15
133	lenvatinib	Lenvima	2014-03-27	Treatment of hepatocellular carcinoma	Designated/Approved	Approved for Orphan Indication	LENVIMA is indicated for the first-line treatment of patients with unresectable hepatocellular carcinoma (HCC)	2018-08-15
134	migalastat hydrochloride	Galafold	2004-02-25	Treatment of Fabry Disease	Designated/Approved	Approved for Orphan Indication	GALAFOLD™ is indicated for the treatment of adults with a confirmed diagnosis of Fabry disease and an amenable galactosidase alpha gene (GLA) variant based on in vitro assay data	2018-08-10
135	patisiran	Onpattro	2012-06-14	Treatment of transthyretin-mediated amyloidosis	Designated/Approved	Approved for Orphan Indication	ONPATTRO is indicated for the treatment of the polyneuropathy of hereditary transthyretin-mediated amyloidosis in adults.	2018-08-10
136	mogamulizumab	Poteligeo	2010-11-02	Treatment of patients with cutaneous T-cell lymphoma.	Designated/Approved	Approved for Orphan Indication	POTELIGEO is indicated for the treatment of adult patients with relapsed or refractory mycosis fungoides (MF) or Sézary syndrome (SS) after at least one prior systemic therapy.	2018-08-08
137	lumacaftor/ivacaftor	Orkambi	2014-06-30	Treatment of cystic fibrosis	Designated/Approved	Approved for Orphan Indication	ORKAMBI is a combination of lumacaftor and ivacaftor indicated for the treatment of cystic fibrosis (CF) in patients age 2 years and older who are homozygous for the F508del mutation in the CFTR gene.	2018-08-07
138	Iobenguane I 131	Azedra Ultratrace	2006-01-18	Treatment of neuroendocrine tumors	Designated/Approved	Approved for Orphan Indication	AZEDRA is indicated for the treatment of adult and pediatric patients 12 years and older with iobenguane scan positive, unresectable, locally advanced or metastatic pheochromocytoma or paraganglioma who require systemic anticancer therapy.	2018-07-30
139	fish oil triglycerides	Omegaven	2008-02-27	Treatment of parenteral nutrition-associated liver disease	Designated/Approved	Approved for Orphan Indication	Omegaven is indicated as a source of calories and fatty acids in pediatric patients with parenteral nutrition-associated cholestasis (PNAC)	2018-07-27
140	tafenoquine	Krintafel	2013-01-15	Treatment of malaria	Designated/Approved	Approved for Orphan Indication	KRINTAFEL is indicated for the radical cure (prevention of relapse) of Plasmodium vivax malaria in patients aged 16 years and older who are receiving appropriate antimalarial therapy for acute P. vivax infection.	2018-07-20
141	ivosidenib	Tibsovo	2015-06-09	Treatment of acute myeloid leukemia (AML)	Designated/Approved	Approved for Orphan Indication	TIBSOVO is indicated for the treatment of adult patients with relapsed or refractory acute myeloid leukemia (AML) with a susceptible isocitrate dehydrogenase-1 (IDH1) mutation as detected by an FDA-approved test.	2018-07-20
142	gemcitabine ready-to-use	Infugem	2015-06-24	Treatment of pancreatic cancer	Designated/Approved	Approved for Orphan Indication	INFUGEM is indicated as first-line treatment for patients with locally advanced (nonresectable Stage II or Stage III) or metastatic (Stage IV) adenocarcinoma of the pancreas. INFUGEM is indicated for patients previously treated with fluorouracil.	2018-07-16
143	gemcitabine ready-to-use	Infugem	2015-06-24	Treatment of ovarian cancer	Designated/Approved	Approved for Orphan Indication	INFUGEM in combination with carboplatin is indicated for the treatment of patients with advanced ovarian cancer that has relapsed at least 6 months after completion of platinum-based therapy.	2018-07-16
144	tecovirimat	Tpoxx	2006-12-27	Treatment of smallpox	Designated/Approved	Approved for Orphan Indication	TPOXX® is indicated for the treatment of human smallpox disease caused by variola virus in adults and pediatric patients weighing at least 13 kg.	2018-07-13
145	pasireotide	Signifor	2009-07-24	Treatment of Cushing's disease	Designated/Approved	Approved for Orphan Indication	SIGNIFOR® LAR is indicated for the treatment of patients with Cushing’s disease for whom pituitary surgery is not an option or has not been curative.	2018-06-29
146	encorafenib + binimetinib	n/a	2013-11-19	Treatment of Stage IIB-IV melanoma positive for the BRAF mutation.	Designated/Approved	Approved for Orphan Indication	BRAFTOVI™ is indicated, in combination with binimetinib, for the treatment of patients with unresectable or metastatic melanoma with a BRAF V600E or V600K mutation, as detected by an FDA-approved test	2018-06-27
147	encorafenib + binimetinib	n/a	2013-11-19	Treatment of Stage IIB-IV melanoma positive for the BRAF mutation.	Designated/Approved	Approved for Orphan Indication	MEKTOVI® is indicated, in combination with encorafenib, for the treatment of patients with unresectable or metastatic melanoma with a BRAF V600E or V600K mutation, as detected by an FDA-approved test	2018-06-27
148	dehydrated alcohol	Ablysinol	2013-09-11	Treatment of hypertrophic obstructive cardiomyopathy	Designated/Approved	Approved for Orphan Indication	ABLYSINOL® is indicated to induce controlled cardiac septal infarction to improve exercise capacity in adults with symptomatic hypertrophic obstructive cardiomyopathy who are not candidates for surgical myectomy.	2018-06-21
149	C1 esterase inhibitor (human)	Cinryze(R)	2004-07-16	Treatment of angioedema	Designated/Approved	Approved for Orphan Indication	CINRYZE is a C1 esterase inhibitor indicated for routine prophylaxis against angioedema attacks in adults, adolescents and pediatric patients (6 years old and above) with Hereditary Angioedema (HAE).	2018-06-20
150	bevacizumab	Avastin	2006-02-09	Therapeutic treatment of patients with ovarian cancer	Designated/Approved	Approved for Orphan Indication	Avastin, in combination with carboplatin and paclitaxel, followed by Avastin as a single agent, is indicated for the treatment of patients with stage III or IV epithelial ovarian, fallopian tube, orprimary peritoneal cancer following initial surgical resection. Avastin, in combination with paclitaxel, pegylated liposomal doxorubicin, or topotecan, is indicated for the treatment of patients with p…	2018-06-13
151	moxidectin	n/a	2010-09-29	Treatment of onchocerciasis volvulus in children and adults	Designated/Approved	Approved for Orphan Indication	Moxidectin Tablets are indicated for the treatment of onchocerciasis due to Onchocerca volvulus in patients aged 12 years and older	2018-06-13
152	bevacizumab	Avastin	2010-11-02	Treatment of primary peritoneal carcinoma.	Designated/Approved	Approved for Orphan Indication	Avastin, in combination with carboplatin and paclitaxel, followed by Avastin as a single agent, is indicated for the treatment of patients with stage III or IV epithelial ovarian, fallopian tube, orprimary peritoneal cancer following initial surgical resection. Avastin, in combination with paclitaxel, pegylated liposomal doxorubicin, or topotecan, is indicated for the treatment of patients with p…	2018-06-13
153	bevacizumab	Avastin	2010-11-23	Treatment of fallopian tube carcinoma	Designated/Approved	Approved for Orphan Indication	Avastin, in combination with carboplatin and paclitaxel, followed by Avastin as a single agent, is indicated for the treatment of patients with stage III or IV epithelial ovarian, fallopian tube, orprimary peritoneal cancer following initial surgical resection. Avastin, in combination with paclitaxel, pegylated liposomal doxorubicin, or topotecan, is indicated for the treatment of patients with p…	2018-06-13
154	pembrolizumab	Keytruda	2016-01-14	Treatment of primary mediastinal B cell lymphoma.	Designated/Approved	Approved for Orphan Indication	KEYTRUDA is indicated for the treatment of adult and pediatric patients with refractory primary mediastinal large B-cell lymphoma (PMBCL), or who have relapsed after 2 or more prior lines of therapy	2018-06-13
155	venetoclax	Venclexta	2012-09-20	Treatment of chronic lymphocytic leukemia	Designated/Approved	Approved for Orphan Indication	VENCLEXTA® (venetoclax) indicated for the treatment of patients with chronic lymphocytic leukemia (CLL) or small lymphocytic lymphoma (SLL), with or without 17p deletion, who have received at least one prior therapy.	2018-06-08
156	rituximab	Rituxan(R); Mabthera(R)	2015-02-23	Treatment of pemphigus vulgaris.	Designated/Approved	Approved for Orphan Indication	RITUXAN is indicated for the treatment of adult patients with moderate to severe pemphigus vulgaris.	2018-06-07
157	pegvaliase-pqpz	Palynziq	1995-03-08	Treatment of hyperphenylalaninemia	Designated/Approved	Approved for Orphan Indication	Palynziq is indicated to reduce blood phenylalanine concentrations in adult patients with phenylketonuria (PKU) who have uncontrolled blood phenylalanine concentrations greater than 600 micromol/L on existing management	2018-05-24
158	Tacrolimus granules for oral suspension	Prograf	2016-10-04	Prevention of rejection in kidney, liver or heart transplant in pediatric patients.	Designated/Approved	Approved for Orphan Indication	PROGRAF Granules (tacrolimus for oral suspension) for the prevention of rejection in heart, kidney or liver transplant in pediatric patients.	2018-05-24
159	tocilizumab	Actemra	2012-07-31	Treatment of pediatric patients (age 16 years and younger) with polyarticular-course juvenile idiopathic arthritis	Designated/Approved	Approved for Orphan Indication	ACTEMRA® (tocilizumab) for subcutaneous injection is indicated for the treatment of active polyarticular juvenile idiopathic arthritis in patients 2 years of age and older	2018-05-11
160	daratumumab	Darzalex	2013-05-06	Treatment of multiple myeloma	Designated/Approved	Approved for Orphan Indication	DARZALEX is indicated in combination with bortezomib, melphalen, and prednisone for the treatment of patients with newly diagnosed multiple myeloma who are ineligible for autologous stem cell transplant; and in combination with lenalidomide and dexamethasone, or bortezomib and dexamethasone, for the treatment of patients with multiple myeloma who have received at least one prior therapy; and in c…	2018-05-07
161	dabrafenib and trametinib	Tafinlar(R) Capsules A Nd Mekinist(R) Tablets	2016-09-01	Treatment of patients with anaplastic thyroid cancer and locally advanced or metastatic papillary thyroid cancer whose tumors harbor a BRAF V600 mutation.	Designated/Approved	Approved for Orphan Indication	MEKINIST is indicated, in combination with dabrafenib, for the treatment of patients with locally advanced or metastatic anaplastic thyroid cancer (ATC) with BRAF V600E mutation and with no satisfactory locoregional treatment options	2018-05-04
162	dabrafenib and trametinib	Tafinlar(R) Capsules A Nd Mekinist(R) Tablets	2016-09-01	Treatment of patients with anaplastic thyroid cancer and locally advanced or metastatic papillary thyroid cancer whose tumors harbor a BRAF V600 mutation.	Designated/Approved	Approved for Orphan Indication	TAFINLAR is indicated, in combination with trametinib, for the treatment of patients with locally advanced or metastatic anaplastic thyroid cancer (ATC) with BRAF V600E mutation and with no satisfactory locoregional treatment options	2018-05-04
163	Coagulation factor Xa (recombinant), inactivated-zhzo	Andexxa	2015-02-23	For reversing the anticoagulant effect of direct or indirect factor Xa inhibitors in patients experiencing a serious uncontrolled bleeding event or who require urgent or emergent surgery	Designated/Approved	Approved for Orphan Indication	Coagulation factor Xa (recombinant), inactivated-zhzo is indicated for patients treated with rivaroxaban and apixaban, when reversal of anticoagulation is needed due to life-threatening or uncontrolled bleeding	2018-05-03
164	tisagenlecleucel-T	Kymriah	2015-02-03	Treatment of diffuse large B-cell lymphoma	Designated/Approved	Approved for Orphan Indication	KYMRIAH is a CD19-directed genetically modified autologous T cell immunotherapy indicated for the treatment of Adult patients with relapsed or refractory (r/r) large B-cell lymphoma after two or more lines of systemic therapy including diffuse large B-cell lymphoma (DLBCL) not otherwise specified, high grade B-cell lymphoma and DLBCL arising from follicular lymphoma	2018-05-01
165	trametinib and dabrafenib	Mekinist And Tafinlar	2012-09-20	Treatment of Stage IIb through IV melanoma.	Designated/Approved	Approved for Orphan Indication	MEKINIST is indicated, in combination with dabrafenib, for the adjuvant treatment of patients with melanoma with BRAF V600E or V600K mutations as detected by an FDA-approved test, and involvement of lymph node(s), following complete resection	2018-04-30
166	trametinib and dabrafenib	Mekinist And Tafinlar	2012-09-20	Treatment of Stage IIb through IV melanoma.	Designated/Approved	Approved for Orphan Indication	TAFINLAR is indicated, in combination with trametinib, for the adjuvant treatment of patients with melanoma with BRAF V600E or V600K mutations, as detected by an FDA-approved test, and involvement of lymph node(s), following complete resection	2018-04-30
167	tolvaptan	Jynarque	2012-04-06	Treatment of autosomal dominant polycystic kidney disease	Designated/Approved	Approved for Orphan Indication	JYNARQUE is indicated to slow kidney function decline in adults at risk of rapidly progressing autosomal dominant polycystic kidney disease (ADPKD)	2018-04-23
168	osimertinib	Tagrisso	2014-09-04	Treatment of epidermal growth factor receptor mutation-positive non-small cell lung cancer	Designated/Approved	Approved for Orphan Indication	TAGRISSO® is indicated for the first-line treatment of patients with metastatic non-small cell lung cancer (NSCLC) whose tumors have epidermal growth factor receptor (EGFR) exon 19 deletions or exon 21 L858R mutations, as detected by an FDA-approved test	2018-04-18
169	burosumab-twza	Crysvita	2009-12-14	Treatment of X-linked hypophosphatemia (formerly known as vitamin D-resistant rickets)	Designated/Approved	Approved for Orphan Indication	CRYSVITA is indicated for the treatment of X-linked hypophosphatemia (XLH) in adult and pediatric patients 1 year of age and older	2018-04-17
170	fostamatinib disodium hexahydrate	n/a	2015-08-25	Treatment of immune thrombocytopenic purpura	Designated/Approved	Approved for Orphan Indication	TAVALISSE is indicated for the treatment of thrombocytopenia in adult patients with chronic immune thrombocytopenia (ITP) who have had an insufficient response to a previous treatment.	2018-04-17
171	recombinant von Willebrand factor (rhVWF)	n/a	2010-11-23	Treatment of von Willebrand disease.	Designated/Approved	Approved for Orphan Indication	Indicated for use in adults (age 18 and older) diagnosed with von Willebrand disease (VWD) for perioperative management of bleeding	2018-04-13
172	everolimus	Afinitor	2009-06-08	Treatment of tuberous sclerosis complex including TSC-associated subependymal giant cell astrocytoma (SEGA), TSC-associated angiomyolipoma and TSC-associated lymphangioleiomyomatosis (LAM)	Designated/Approved	Approved for Orphan Indication	For the adjunctive treatment of adult and pediatric patients age 2 years and older with tuberous sclerosis complex (TSC)-associated partial-onset seizures.	2018-04-10
173	rucaparib	Rubraca	2012-07-31	Treatment of ovarian cancer	Designated/Approved	Approved for Orphan Indication	For the maintenance treatment of adult patients with recurrent epithelial ovarian, fallopian tube, or primary peritoneal cancer who are in complete or partial response to platinum-based chemotherapy.	2018-04-06
174	blinatumomab	Blincyto	2008-05-16	Treatment of acute lymphocytic leukemia	Designated/Approved	Approved for Orphan Indication	BLINCYTO® is indicated for the treatment of B-cell precursor acute lymphoblastic leukemia (ALL) in first or second complete remission with minimal residual disease (MRD) greater than or equal to 0.1% in adults and children.	2018-03-29
175	sargramostim	Leukine	2016-11-09	Treatment of individuals acutely exposed to myelosuppressive doses of radiation (hematopoietic syndrome of acute radiation syndrome)	Designated/Approved	Approved for Orphan Indication	LEUKINE® is indicated to increase survival in adult and pediatric patients from birth to 17 years of age acutely exposed to myelosuppressive doses of radiation (Hematopoietic Syndrome of Acute Radiation Syndrome [H-ARS]).	2018-03-29
176	nilotinib	Tasigna	2006-04-27	Treatment of chronic myelogenous leukemia	Designated/Approved	Approved for Orphan Indication	TASIGNA® (nilotinib) is indicated for the treatment of pediatric patients greater than or equal to 1 year of age with newly diagnosed Philadelphia chromosome positive chronic myeloid leukemia (Ph+ CML) in chronic phase and pediatric patients greater than or equal to 1 year of age with chronic phase Philadelphia chromosome positive chronic myeloid leukemia (Ph+ CML) with resistance or intolerance …	2018-03-22
177	brentuximab vedotin	Adcetris	2007-01-30	Treatment of Hodgkin's lymphoma	Designated/Approved	Approved for Orphan Indication	ADCETRIS® is indicated for the treatment of adult patients with previously untreated Stage III or IV classical Hodgkin lymphoma (cHL), in combination with chemotherapy.	2018-03-20
178	Immune Globulin Subcutaneous (Human), 20% Liquid	Hizentra	2014-08-18	Treatment of chronic inflammatory demyelinating polyneuropathy (CIDP)	Designated/Approved	Approved for Orphan Indication	Indicated for the treatment of adult patients with chronic inflammatory demyelinating polyneuropathy (CIDP) as maintenance therapy to prevent relapse of neuromuscular disability and impairment.	2018-03-15
179	ibalizumab	Trogarzo	2014-10-20	Treatment of HIV-1 infection in treatment experienced adult patients with documented multi-antiretroviral class resistance and evidence of HIV-1 replication despite ongoing antiretroviral therapy	Designated/Approved	Approved for Orphan Indication	TROGARZO, in combination with other antiretroviral(s), is indicated for the treatment of human immunodeficiency virus type 1 (HIV-1) infection in heavily treatment-experienced adults with multidrug resistant HIV-1 infection failing their current antiretroviral regimen.	2018-03-06
180	hydroxyprogesterone caproate	Makena	2007-01-25	Prevention of preterm birth in singleton pregnancies	Designated/Approved	Approved for Orphan Indication	Makena auto-injector for subcutaneous injection is indicated to reduce the risk of preterm birth in women with singleton pregnancy who have a history of singleton spontaneous preterm birth.	2018-02-14
181	Tezacaftor and Ivacaftor combination therapy	Symdeko	2017-06-15	Treatment of cystic fibrosis (CF)	Designated/Approved	Approved for Orphan Indication	SYMDEKO a combination of tezacaftor and ivacaftor, is indicated for the treatment of patients with cystic fibrosis (CF) aged 12 years and older who are homozygous for the F508del mutation or who have at least one mutation in the cystic fibrosis transmembrane conductance regulator (CFTR) gene that is responsive to tezacaftor/ivacaftor based on in vitro data and/or clinical evidence	2018-02-12
182	lutetium Lu 177 dotatate	n/a	2009-01-12	Treatment of gastro-entero-pancreatic neuroendocrine tumors	Designated/Approved	Approved for Orphan Indication	Treatment of somatostatin receptor positive GEP-NETs including foregut, midgut, and hindgut neuroendocrine tumors in adults	2018-01-26
183	Arsenic trioxide	Trisenox	1998-03-03	Treatment of acute promyelocytic leukemia.	Designated/Approved	Approved for Orphan Indication	In combination with tretinoin for treatment of adults with newly-diagnosed low-risk acute promyelocytic leukemia (APL) whose APL is characterized by the presence of the t(15;17) translocation or PML/RAR-alpha gene expression.	2018-01-12
184	afatinib	Gilotrif	2012-12-03	Treatment of epidermal growth factor receptor (EGFR) mutation-positive non-small cell lung cancer (NSCLC).	Designated/Approved	Approved for Orphan Indication	GILOTRIF is indicated for the first-line treatment of patients with metastatic non-small cell lung cancer (NSCLC) whose tumors have non-resistant epidermal growth factor receptor (EGFR) mutations as detected by an FDA-approved test.	2018-01-12
185	cysteamine enteric coated	Procysbi	2006-10-24	Treatment of cystinosis	Designated/Approved	Approved for Orphan Indication	PROCYSBI is indicated for the treatment of nephropathic cystinosis in adults and pediatric patients 1 year of age and older.	2017-12-22
186	hydroxycarbamide (hydroxyurea)	Siklos	2013-07-24	Treatment of sickle cell disease in patients under 18 years of age	Designated/Approved	Approved for Orphan Indication	To reduce the frequency of painful crises and to reduce the need for blood transfusions in pediatric patients, 2 years of age and older, with sickle cell anemia with recurrent moderate to severe painful crisis	2017-12-21
187	macimorelin acetate	Macrelin	2007-05-14	Diagnosis of growth hormone deficiency	Designated/Approved	Approved for Orphan Indication	For the diagnosis of adult growth hormone deficiency	2017-12-20
188	nivolumab	Opdivo	2013-01-23	Treatment of Stage IIb to IV melanoma	Designated/Approved	Approved for Orphan Indication	Adjuvant treatment of patients with melanoma with involvement of lymph nodes or metastatic disease who have undergone complete resection	2017-12-20
189	bosutinib	Bosulif	2009-02-24	Treatment of chronic myelogenous leukemia	Designated/Approved	Approved for Orphan Indication	BOSULIF is indicated for the treatment of adult patients with newly-diagnosed chronic phase (CP) Philadelphia chromosome-positive chronic myelogenous leukemia (Ph+CML).	2017-12-19
190	voretigene neparvovec-rzyl	Luxturna	2015-03-18	Treatment of inherited retinal dystrophy due to biallelic RPE65 gene mutations	Designated/Approved	Approved for Orphan Indication	an adeno-associated virus vector-based gene therapy indicated for the treatment of patients with confirmed biallelic RPE65 mutation-associated retinal dystrophy. Patients must have viable retinal cells determined by a treating physician	2017-12-19
191	mepolizumab	Nucala	2011-07-14	Treatment of Churg-Strauss Syndrome	Designated/Approved	Approved for Orphan Indication	Treatment of adult patients with Eosinophilic Granulomatosis Polyangiitis (EGPA)	2017-12-12
192	emicizumab-kxwh	Hemlibra	2014-01-10	Treatment of hemophilia A	Designated/Approved	Approved for Orphan Indication	Routine prophylaxis to prevent or reduce the frequency of bleeding episodes in adult and pediatric patients with hemophilia A (congenital factor VIII deficiency) with factor VIII inhibitors	2017-11-16
193	obinutuzumab	Gazyva	2015-04-15	Treatment of follicular lymphoma	Designated/Approved	Approved for Orphan Indication	GAZYVA, in combination with bendamustine followed by GAZYVA monotherapy, is indicated for the treatment of patients with follicular lymphoma (FL) who relapsed after, or are refractory to, a rituximab-containing regimen; and in combination with chemotherapy followed by GAZYVA monotherapy in patients achieving at least a partial remission for the treatment of adult patients with previously untreate…	2017-11-16
194	vestronidase alfa-vjbk	Mepsevii	2012-02-16	Treatment of mucopolysaccharidosis VII (MPS VII, Sly Syndrome)	Designated/Approved	Approved for Orphan Indication	Indicated in pediatric and adult patients for the treatment of Mucopolysaccharidosis VII (PMS VII, Sly syndrome).	2017-11-15
195	dasatinib	Sprycel	2005-11-28	Treatment of chronic myelogenous leukemia	Designated/Approved	Approved for Orphan Indication	Treatment of pediatric patients with Philadelphia chromosome-positive (Ph+) chronic myeloid leukemia (CML) in chronic phase	2017-11-09
196	brentuximab vedotin	Adcetris	2012-11-19	Treatment of mycosis fungoides	Designated/Approved	Approved for Orphan Indication	Treatment for adult patients with CD30-expressing mycosis fungoides who have received prior systemic therapy	2017-11-09
197	Brentuximab vedotin	Adcetris	2016-09-07	Treatment of primary cutaneous CD30-positive T-cell lymphoproliferative disorders	Designated/Approved	Approved for Orphan Indication	For adult patients with primary cutaneous anaplastic large cell lymphoma who have received prior systemic therapy	2017-11-09
198	letermovir	Prevymis	2011-12-12	Prevention of human cytomegalovirus viremia and disease in at risk populations	Designated/Approved	Approved for Orphan Indication	Prophylaxis of cytomegalovirus (CMV) infection and disease in adult CMV-seropositive recipients [R+] of an allogeneic hematopoietic stem cell transplant (HSCT).	2017-11-08
199	alectinib	Alecensa	2015-01-27	Treatment of ALK-positive non-small cell lung cancer	Designated/Approved	Approved for Orphan Indication	ALECENSA is indicated for the treatment of patients with anaplastic lymphoma kinase (ALK)-positive, metastatic non-small cell lung cancer (NSCLC) as detected by an FDA-approved test.	2017-11-06
200	vemurafenib	Zelboraf	2016-08-02	Treatment of Erdheim-Chester Disease	Designated/Approved	Approved for Orphan Indication	Treatment of patients with Erdheim-Chester Disease with BRAF V600 mutation	2017-11-06
201	acalabrutinib	Calquence	2015-09-21	Treatment of mantle cell lymphoma.	Designated/Approved	Approved for Orphan Indication	treatment of adult patients with mantle cell lymphoma (MCL) who have received at least one prior therapy	2017-10-31
202	eculizumab	Soliris	2014-06-12	Treatment of Myasthenia Gravis	Designated/Approved	Approved for Orphan Indication	for the treatment of adult patients with generalized Myasthenia Gravis (gMG) who are anti-acetylcholine receptor (AchR) antibody positive	2017-10-23
203	axicabtagene ciloleucel	Yescarta	2014-03-27	Treatment of diffuse large B-cell lymphoma	Designated/Approved	Approved for Orphan Indication	Treatment of adult patients with relapsed or refractory large B-cell lymphoma after two or more lines of systemic therapy, including diffuse large B-cell lymphoma (DLBCL) not otherwise specified, primary mediastinal large B-cell lymphoma, high-grade B-cell lymphoma, and DLBCL arising from follicular lymphoma	2017-10-18
204	axicabtagene ciloleucel	Yescarta	2016-04-25	Treatment of follicular lymphoma.	Designated/Approved	Approved for Orphan Indication	Treatment of adult patients with relapsed or refractory large B-cell lymphoma after two or more lines of systemic therapy, including diffuse large B-cell lymphoma (DLBCL) not otherwise specified, primary mediastinal large B-cell lymphoma, high-grade B-cell lymphoma, and DLBCL arising from follicular lymphoma	2017-10-18
205	axicabtagene ciloleucel	Yescarta	2016-04-20	Treatment of primary mediastinal B-cell lymphoma.	Designated/Approved	Approved for Orphan Indication	Treatment of adult patients with relapsed or refractory large B-cell lymphoma after two or more lines of systemic therapy, including diffuse large B-cell lymphoma (DLBCL) not otherwise specified, primary mediastinal large B-cell lymphoma, high-grade B-cell lymphoma, and DLBCL arising from follicular lymphoma	2017-10-18
206	ascorbic acid	Ascor	2007-08-31	Treatment of scurvy	Designated/Approved	Approved for Orphan Indication	for the treatment of scurvy in adult and pediatric patients age 5 months and older for whom oral administrtaion is not possible, insufficient or contraindicated	2017-10-02
207	emtricitabine and tenofovir alafenamide combination	Descovy(R)	2017-06-06	Treatment of HIV-1 infection in pediatric patients under 12 years of age	Designated/Approved	Approved for Orphan Indication	DESCOVY, indicated in combination with other antiretroviral agents, for the treatment of HIV-1 infection in adults and pediatric patients weighing at least 35 kg and also indicated, in combination with other antiretroviral agents other than protease inhibitors that require a CYP3A inhibitor, for the treatment of HIV-1 infection in pediatric patients weighing at least 25 kg and less than 35 kg.	2017-09-28
208	pembrolizumab	Keytruda	2015-06-16	Treatment of gastric cancer, including gastroesophageal junction adenocarcinoma	Designated/Approved	Approved for Orphan Indication	KEYTRUDA is indicated for the treatment of patients with recurrent locally advanced or metastatic gastric or gastroesophageal junction adenocarcinoma whose tumors express PD-L1 [Combined Positive Score (CPS) =1] as determined by an FDA-approved test, with disease progression on or after two or more prior lines of therapy including fluoropyrimidine- and platinum-containing chemotherapy and if appr…	2017-09-22
209	nivolumab	Opdivo	2015-09-02	Treatment of hepatocellular carcinoma	Designated/Approved	Approved for Orphan Indication	Treatment of patients with hepatocellular carcinoma (HCC) who have been previously treated with sorafenib	2017-09-22
210	lanreotide acetate	n/a	2011-09-08	Treatment of carcinoid syndrome	Designated/Approved	Approved for Orphan Indication	treatment of adults with carcinoid syndrome; when used, it reduces the frequency of short-acting somatostatin analog rescue therapy	2017-09-15
211	copanlisib	Aliqopa	2015-02-05	Treatment of follicular lymphoma	Designated/Approved	Approved for Orphan Indication	Treatment of adult patients with relapsed follicular lymphoma who have received at least two prior systemic therapies	2017-09-14
212	bosentan	Tracleer	2000-10-06	Treatment of pulmonary arterial hypertension	Designated/Approved	Approved for Orphan Indication	Treatment of pulmonary arterial hypertension (PAH) (WHO Group 1) in pediatric patients aged 3 years and older with idiopathic or congenital PAH to improve pulmonary vascular resistance (PVR), which is expected to result in an improvement in exercise ability	2017-09-05
213	Gemtuzumab ozogamicin	Mylotarg	1999-11-24	Treatment of acute myeloid leukemia	Designated/Approved	Approved for Orphan Indication	Treatment of newly-diagnosed CD33-positive acute myeloid leukemia in adults and treatment of relapsed or refractory CD33-positive acute myeloid leukemia in adults and in pediatric patients 2 years and older	2017-09-01
214	(tisagenlecleucel) Autologous T Cells transduced with lentiviral vector containing a chimeric antigen receptor directed against CD19	Kymriah (Tisagenlecleucel)	2014-01-31	For the treatment of Acute Lymphoblastic Leukemia	Designated/Approved	Approved for Orphan Indication	Treatment of patients up to 25 years of age with B-cell precursor acute lymphoblastic leukemia (ALL) that is refractory or in second or later relapse	2017-08-30
215	tocilizumab	Actemra	2017-08-01	Treatment of chimeric antigen receptor (CAR) T cell-induced cytokine release syndrome	Designated/Approved	Approved for Orphan Indication	Treatment of chimeric antigen receptor (CAR) T cell-induced severe or life-threatening cytokine release syndrome (CRS) in adults and pediatric patients 2 years of age and older	2017-08-30
216	benznidazole	n/a	2014-04-14	Treatment of Chagas disease	Designated/Approved	Approved for Orphan Indication	Treatment of Chagas disease (American trypanosomiasis), caused by Trypanosoma cruzi, in pediatric patients 2 to 12 years of age.	2017-08-29
217	Amantadine hydrochloride	Gocovri	2015-04-09	Treatment of levodopa-induced dyskinesia	Designated/Approved	Approved for Orphan Indication	treatment of dyskinesia in patients with Parkinson's disease receiving levodopa-based therapy with or without concomitant dopminergic medications	2017-08-24
218	inotuzumab ozogamicin	n/a	2013-03-25	Treatment of B-cell acute lymphoblastic leukemia	Designated/Approved	Approved for Orphan Indication	Treatment of adults with relapsed or refractory B-cell precursor acute lymphoblastic leukemia (ALL)	2017-08-17
219	olaparib	Lynparza	2013-10-16	Treatment of ovarian cancer	Designated/Approved	Approved for Orphan Indication	Maintenance treatment of adult patients with recurrent epithelial ovarian, fallopian tube or primary peritoneal cancer, who are in a complete or partial response to platinum-based chemotherapy.	2017-08-17
220	olaparib	Lynparza	2018-05-15	Treatment of Fallopian Tube Cancer	Designated/Approved	Approved for Orphan Indication	Maintenance treatment of adult patients with recurrent epithelial ovarian, fallopian tube or primary peritoneal cancer, who are in a complete or partial response to platinum-based chemotherapy; and treatment of adult patients with deleterious or suspected deleterious germline BRCA-mutated advanced ovarian cancer who have been treated with three or more prior lines of chemotherapy.	2017-08-17
221	olaparib	Lynparza	2018-05-15	Treatment of primary peritoneal cancer	Designated/Approved	Approved for Orphan Indication	Maintenance treatment of adult patients with recurrent epithelial ovarian, fallopian tube or primary peritoneal cancer, who are in a complete or partial response to platinum-based chemotherapy; and treatment of adult patients with deleterious or suspected deleterious germline BRCA-mutated advanced ovarian cancer who have been treated with three or more prior lines of chemotherapy.	2017-08-17
222	Cytarabine:daunorubicin liposome injection	Vyxeos	2008-08-22	Treatment of acute myeloid leukemia	Designated/Approved	Approved for Orphan Indication	Treatment of adults with newly-diagnosed therapy-related acute myeloid leukemia (t-AML) or AML with myelodysplasia-related changes (AML-MRC)	2017-08-03
223	ibrutinib	Imbruvica	2016-06-23	Treatment of chronic Graft versus Host disease.	Designated/Approved	Approved for Orphan Indication	Treatment of adult patients with chronic graft versus host disease (cGVHD) after failure of one or more lines of systemic therapy.	2017-08-02
224	enasidenib	Idhifa	2014-06-12	Treatment of acute myelogenous leukemia	Designated/Approved	Approved for Orphan Indication	Treatment of adult patients with relapsed or refractory acute myeloid leukemia with an isocitrate dehydrogenase-2 (IDH2) mutation as detected by an FDA-approved test	2017-08-01
225	ivacaftor	Kalydeco	2006-12-20	Treatment of patients with cystic fibrosis	Designated/Approved	Approved for Orphan Indication	Treatment of cystic fibrosis (CF) in patients age 2 years and older who have one mutation in the CFTR gene that is responsive to ivacaftor potentiation based on clinical and/or in vitro assay data.	2017-07-31
226	ipilimumab	Yervoy	2004-06-03	Treatment of high risk Stage II, Stage III, and Stage IV melanoma	Designated/Approved	Approved for Orphan Indication	treatment of unresectable or metastatic melanoma in adults and pediatric patients (12 years and older)	2017-07-21
227	L-glutamine	Endari	2001-08-01	Treatment of sickle cell disease	Designated/Approved	Approved for Orphan Indication	To reduce the acute complications of sickle cell disease in adult and pediatric patients 5 years of age and older.	2017-07-07
228	triptorelin pamoate	Triptodur	2012-08-20	Treatment of central precocious puberty	Designated/Approved	Approved for Orphan Indication	Treatment of pediatric patients 2 years of age and older with central precocious puberty	2017-06-29
229	C1-esterase-inhibitor, human, pasteurized	Haegarda	1992-10-16	Prevention and/or treatment of acute attacks of hereditary angioedema.	Designated/Approved	Approved for Orphan Indication	For routine prophylaxis to prevent Hereditary Angioedema (HAE) attacks in adolescent and adult patients.	2017-06-22
230	dabrafenib and trametinib	Mekinist	2015-10-29	Treatment of patients with BRAF mutation positive non-small cell lung cancer.	Designated/Approved	Approved for Orphan Indication	Mekinist in combination with dabrafenib, for the treatment of patients with metastatic non-small cell lung cancer (NSCLC) with BRAF V600E mutation as detected by an FDA-approved test.	2017-06-22
231	rituximab and recombinant human hyaluronidase	Rituxan Sc	2016-08-22	Treatment of follicular lymphoma	Designated/Approved	Approved for Orphan Indication	Treatment of adult patients with relapsed or refractory, follicular lymphoma as a single agent; previously untreated follicular lymphoma in combination with first line chemotherapy and, in patients achieving a complete or partial response to rituximab in combination with chemotherapy, as single-agent maintenance therapy; and non-progressing (including stable disease), follicular lymphoma as a sin…	2017-06-22
232	rituximab and recombinant human hyaluronidase	Rituxin Sc	2016-08-22	Treatment of chronic lymphocytic leukemia (CLL)	Designated/Approved	Approved for Orphan Indication	Treatment of adult patients with previously untreated and previously treated CLL in combination with fludarabine and cyclophosphamide	2017-06-22
233	rituximab and recombinant human hyaluronidase	Rituxan Sc	2016-09-07	Treatment of diffuse large B-cell lymphoma	Designated/Approved	Approved for Orphan Indication	Treatment of adult patients with previously untreated diffuse large B-cell lymphoma in combination with cyclophosphamide, doxorubicin, vincristine, prednisone (CHOP) or other anthracycline-based chemotherapy regimens	2017-06-22
234	daratumumab	Darzalex	2013-05-06	Treatment of multiple myeloma	Designated/Approved	Approved for Orphan Indication	DARZALEX is indicated in combination with lenalidomide and dexamethasone, or bortezomib and dexamethasone, for the treatment of patients with multiple myeloma who have received at least one prior therapy; and in combination with pomalidomide and dexamethasone for the treatment of patients with multiple myeloma who have received at least two prior therapies including lenalidomide and a proteasome …	2017-06-16
235	Ritonavir powder for oral suspension	Norvir Powder For Oral Suspension	2017-01-11	Use with other antiretroviral agents for the treatment of pediatric HIV-1 infection	Designated/Approved/Withdrawn		Used in combination with other antiretroviral agents for the treatment of patients with HIV-1 infection	N/A
236	5-aminolevulinic acid	Gleolan	2013-01-15	Visualization of malignant tissue during surgery for malignant glioma (WHO grades III and IV)	Designated/Approved	Approved for Orphan Indication	Optical imaging agent indicated in patients with glioma (suspected World Health Organization Grades III or IV on preoperative imaging) as an adjunct for the visualization of malignant tissue during surgery	2017-06-06
237	ceritinib	Zykadia	2013-09-27	Treatment of patients with non-small cell lung cancer (NSCLC) that is anaplastic lymphoma kinase(ALK)-positive	Designated/Approved	Approved for Orphan Indication	Treatment of patients with metastatic non-small cell lung cancer (NSCLC) whose tumors are anaplastic lymphoma kinase (ALK)-positive as detected by an FDA-approved test	2017-05-26
238	Deferasirox	Exjade; Jadenu Sprinkles	2002-11-21	Treatment of chronic iron overload in patients with transfusion-dependent anemias	Designated/Approved	Approved for Orphan Indication	treatment of chronic iron overload due to blood transfusions (transfusional hemosiderosis) in patients 2 years of age and older	2017-05-18
239	deferasirox	Exjade; Jadenu Sprinkles	2015-02-24	Treatment of chronic iron overload in alpha-thalassemia	Designated/Approved	Approved for Orphan Indication	Treatment of chronic iron overload in patients 10 years of age and older with non-transfusion-dependent thalassemia (NTDT) syndromes and with a liver iron concentration (LIC) of at least 5 milligrams of iron per gram of liver dry weight (mg Fe/g dw) and a serum ferritin greater than 300 mcg/L.	2017-05-18
240	ivacaftor	Kalydeco	2006-12-20	Treatment of patients with cystic fibrosis	Designated/Approved	Approved for Orphan Indication	Treatment of cystic fibrosis (CF) in patients age 2 years and older who have one mutation in the CFTR gene that is responsive to ivacaftor potentiation based on clinical and/or in vitro assay data.	2017-05-17
241	edaravone	Radicava	2015-05-12	Treatment of amyotrophic lateral sclerosis	Designated/Approved	Approved for Orphan Indication	Treatment of amyotrophic lateral sclerosis (ALS)	2017-05-05
242	Sterile talc	Steritalc	1997-12-08	Treatment of malignant pleural effusion	Designated/Approved	Approved for Orphan Indication	To decrease the recurrence of malignant pleural effusions in symptomatic patients following maximal drainage of the pleural effusion.	2017-05-01
243	Sterile talc	Steritalc	1997-12-08	Treatment of pneumothorax	Designated/Approved	Approved for Orphan Indication	Steritalc is indicated in adults to decrease the recurrence of pneumothorax.	2017-05-01
244	glycerol phenylbutyrate	Ravicti	2009-04-27	Maintenance treatment of patients with deficiencies in enzymes of the urea cycle	Designated/Approved	Approved for Orphan Indication	For use as a nitrogen-binding agent for chronic management of patients 2 months of age and older with urea cycle disorders (UCDs) who cannot be managed by dietary protein restriction and/or amino acid supplementation alone.	2017-04-28
245	midostaurin	Rydapt	2009-07-07	Treatment of acute myeloid leukemia	Designated/Approved	Approved for Orphan Indication	Treatment of adult patients with newly diagnosed acute myeloid leukemia (AML) that is FLT3 mutation-positive as detected by an FDA approved test, in combination with standard cytarabine and daunorubicin induction and cytarabine consolidation.	2017-04-28
246	midostaurin	Rydapt	2010-04-30	Treatment of mastocytosis	Designated/Approved	Approved for Orphan Indication	Treatment of adult patients with aggressive systemic mastocytosis (ASM), systemic mastocytosis with associated hematological neoplasm (SM-AHN), or mast cell leukemia (MCL)	2017-04-28
247	brigatinib	Alunbrig	2016-04-28	Treatment of anaplastic lymphoma kinase-positive (ALK+), c-ros 1 oncogene positive (ROS1+), or epidermal growth factor receptor positive (EGFR+) non-small cell lung cancer (NSCLC).	Designated/Approved	Approved for Orphan Indication	Treatment of patients with anaplastic lymphoma kinase (ALK)-positive metastatic non-small cell lung cancer (NSCLC) who have progressed on or are intolerant to crizotinib	2017-04-28
248	cerliponase alfa	Brineura	2013-04-01	Treatment of neuronal ceroid lipofuscinosis type 2	Designated/Approved	Approved for Orphan Indication	To slow the loss of ambulation in symptomatic pediatric patients 3 years of age and older with late infantile neuronal ceroid lipofuscinosis type 2 (CLN2), also known as tripeptidyl peptidase 1 (TPP1) deficiency.	2017-04-27
249	regorafenib	Stivarga	2015-06-04	Treatment of hepatocellular carcinoma	Designated/Approved	Approved for Orphan Indication	Treatment of patients with hepatocellular carcinoma (HCC or liver cancer) who have been previously treated with sorafenib.	2017-04-27
250	nivolumab	Opdivo	2014-08-07	Treatment of Hodgkin lymphoma	Designated/Approved	Approved for Orphan Indication	Treatment of adult patients with classical Hodgkin lymphoma (cHL) that has relapsed or progressed after autologous hematopoietic stem cell transplantation (HSCT) and brentuximab vedotin; or 3 or more lines of systemic therapy that includes autologous HSCT.	2017-04-25
251	methotrexate oral solution	Xatmep	2015-08-27	Management of pediatric patients with active polyarticular juvenile idiopathic arthritis (pJIA) who are intolerant of or had an inadequate response to first-line therapy.	Designated/Approved	Approved for Orphan Indication	Management of pediatric patients with active polyarticular juvenile idiopathic arthritis (pJIA) who have had an insufficient therapeutic response to, or are intolerant of, an adequate trial of first-line therapy including full dose non-steroidal anti-inflammatory agents (NSAIDs).	2017-04-25
252	methotrexate oral solution	Xatmep	2015-05-28	Treatment of acute lymphoblastic leukemia in pediatric patients (0 through 16 years of age)	Designated/Approved	Approved for Orphan Indication	Treatment of pediatric patients with acute lymphoblastic leukemia (ALL) as a component of a combination chemotherapy maintenance regimen	2017-04-25
253	ledipasvir/sofosbuvir	Harvoni	2016-10-12	Treatment of chronic hepatitis C virus (HCV) infection in pediatric patients	Designated/Approved	Approved for Orphan Indication	Treatment of pediatric patients 12 years of age and older or weighing at least 35 kg with chronic hepatitis C virus genotype 1, 4, 5, or 6 infection without cirrhosis or with compensated cirrhosis	2017-04-07
254	sofosbuvir	Sovaldi	2016-10-25	Treatment of pediatric chronic hepatitis C virus infection	Designated/Approved	Approved for Orphan Indication	Treatment of chronic HCV genotype 2 or 3 infection in pediatric patients 12 years of age and older or weighing at least 35 kg without cirrhosis or with compensated cirrhosis for use in combination with ribavirin	2017-04-07
255	d6-tetrabenazine, deutetrabenazine	Austedo	2014-11-05	Treatment of Huntington's Disease	Designated/Approved	Approved for Orphan Indication	Treatment of chorea associated with Huntington’s disease	2017-04-03
256	niraparib	Zejula	2010-04-30	Treatment of ovarian cancer	Designated/Approved	Approved for Orphan Indication	Indicated for maintenance treatment of adult patients with recurrent epithelial ovarian, fallopian tube, or primary peritoneal cancer who are in a complete or partial response to platinum-based chemotherapy	2017-03-27
257	avelumab (Recombinant human monoclonal IgG1 antibody against programmed death ligand-1)	Bavencio	2015-09-21	Treatment of merkel cell carcinoma.	Designated/Approved	Approved for Orphan Indication	Treatment of adults and pediatric patients 12 years and older with metastatic Merkel cell carcinoma	2017-03-23
258	pembrolizumab	Keytruda	2015-12-30	Treatment of Hodgkin lymphoma.	Designated/Approved	Approved for Orphan Indication	Treatment for adult and pediatric patients with refractory classical Hodgkin Lymphoma (cHL), or who have relapsed after 3 or more prior lines of therapy.	2017-03-14
259	telotristat etiprate	Xermelo	2012-03-09	Treatment of carcinoid syndrome in patients with neuroendocrine tumors	Designated/Approved	Approved for Orphan Indication	Treatment of carcinoid syndrome diarrhea in combination with somatostatin analog (SSA) therapy in adults inadequately controlled by SSA therapy.	2017-02-28
260	lenalidomide	Revlimid	2001-09-20	Treatment of multiple myeloma	Designated/Approved	Approved for Orphan Indication	Treatment of multiple myeloma (MM), as maintenance following autologous hematopoietic stem cell transplantation (auto-HSCT)	2017-02-22
261	deflazacort	Emflaza	2013-08-16	Treatment of Duchenne muscular dystrophy	Designated/Approved	Approved for Orphan Indication	Treatment of Duchenne Muscular Dystrophy in patients 5 years of age and older	2017-02-09
262	Thiotepa	Tepadina	2007-04-02	Conditioning treatment prior to hematopoietic stem cell transplantation	Designated/Approved	Approved for Orphan Indication	Indicated for reducing the risk of graft rejection when used in conjunction with high-dose busulfan and cyclophosphamide as a preparative regimen for allogenic hematopoietic progenitor (stem) cell transplantation for pediatric patients with class 3 beta-thalassemia	2017-01-26
263	ibrutinib	Imbruvica	2016-02-02	Treatment of patients with extranodal marginal zone lymphoma (mucosa associated lymphoid tissue [MALT type] lymphoma)	Designated/Approved	Approved for Orphan Indication	Treatment of patients with Marginal Zone Lymphoma (MZL) who require systemic therapy and have received at least one prior anti-CD20-based therapy.	2017-01-18
264	ibrutinib	Imbruvica	2015-02-05	Treatment of nodal marginal zone lymphoma	Designated/Approved	Approved for Orphan Indication	Treatment of patients with Marginal Zone Lymphoma (MZL) who require systemic therapy and have received at least one prior anti-CD20-based therapy.	2017-01-18
265	ibrutinib	Imbruvica	2015-02-05	Treatment of splenic marginal zone lymphoma	Designated/Approved	Approved for Orphan Indication	Treatment of patients with Marginal Zone Lymphoma (MZL) who require systemic therapy and have received at least one prior anti-CD20-based therapy.	2017-01-18
266	nusinersen	Spinraza	2011-04-18	Treatment of spinal muscular atrophy	Designated/Approved	Approved for Orphan Indication	Treatment of spinal muscular atrophy in pediatric and adult patients	2016-12-23
267	rucaparib	Rubraca	2012-07-31	Treatment of ovarian cancer	Designated/Approved	Approved for Orphan Indication	As monotherapy for the treatment of patients with deleterious BRCA mutation (germline and/or somatic) associated advanced ovarian cancer who have been treated with two or more chemotherapies	2016-12-19
268	bevacizumab	Avastin	2006-02-09	Therapeutic treatment of patients with ovarian cancer	Designated/Approved	Approved for Orphan Indication	Avastin in combination with paclitaxel, pegylated liposomal doxorubicin, or topotecan is indicated for the treatment of patients with platinum-resistant recurrent epithelial ovarian, fallopian tube or primary peritoneal cancer who received no more than 2 prior chemotherapy regimens. Avastin, either in combination with carboplatin and paclitaxel or in combination with carboplatin and gemcitabine, …	2016-12-06
269	bevacizumab	Avastin	2010-11-02	Treatment of primary peritoneal carcinoma.	Designated/Approved	Approved for Orphan Indication	Avastin in combination with paclitaxel, pegylated liposomal doxorubicin, or topotecan is indicated for the treatment of patients with platinum-resistant recurrent epithelial ovarian, fallopian tube or primary peritoneal cancer who received no more than 2 prior chemotherapy regimens. Avastin, either in combination with carboplatin and paclitaxel or in combination with carboplatin and gemcitabine, …	2016-12-06
270	bevacizumab	Avastin	2010-11-23	Treatment of fallopian tube carcinoma	Designated/Approved	Approved for Orphan Indication	Avastin in combination with paclitaxel, pegylated liposomal doxorubicin, or topotecan is indicated for the treatment of patients with platinum-resistant recurrent epithelial ovarian, fallopian tube or primary peritoneal cancer who received no more than 2 prior chemotherapy regimens. Avastin, either in combination with carboplatin and paclitaxel or in combination with carboplatin and gemcitabine, …	2016-12-06
271	daratumumab	Darzalex	2013-05-06	Treatment of multiple myeloma	Designated/Approved	Approved for Orphan Indication	DARZALEX is indicated in combination with lenalidomide and dexamethasone, or bortezomib and dexamethasone, for the treatment of patients with multiple myeloma who have received at least one prior therapy; and as monotherapy, for the treatment of patients with multiple myeloma who have received at least three prior lines of therapy including a proteasome inhibitor (PI) and an immunomodulatory agen…	2016-11-21
272	mebendazole	Vermox 500 Mg Chewable Tablets	2014-09-03	Treatment of single or mixed gastrointestinal infestations by Trichuris trichiura (whipworm), Ascaris lumbricoides (large roundworm), and Ancylostoma duodenale and Nectar americanus (hookworm).	Designated/Approved	Approved for Orphan Indication	treatment of patients one year of age and older withgastrointestinal infections caused by Ascaris lumbricoides (roundworm) and Trichuris trichiura (whipworm)	2016-10-19
273	olaratumab	Lartruvo	2014-10-09	Treatment of soft tissue sarcoma	Designated/Approved	Approved for Orphan Indication	In combination with doxorubicin, for the treatment of adult patients with soft tissue sarcoma (STS) with a histologic subtype for which an anthracycline-containing regimen is appropriate and which is not amenable to curative treatment with radiotherapy or surgery.	2016-10-19
274	paricalcitol	Zemplar	2015-10-27	Treatment of pediatric hyperparathyroidism	Designated/Approved	Approved for Orphan Indication	Indicated in adults and pediatric patients 10 years of age and older for the prevention and treatment of secondary hyperparathyroidism associated with Chronic kidney disease (CKD) Stages 3 and 4 and CKD Stage 5 in patients on hemodialysis or peritoneal dialysis	2016-10-18
275	intravenous carbamazepine	Carnexiv	2013-06-27	Treatment of epilepsy patients who cannot take anything by mouth (NPO)	Designated/Approved	Approved for Orphan Indication	Replacement therapy for oral carbamazepine formulations, when oral administration is temporarily not feasible, in adults with the following seizure types: (1) Partial seizures with complex symptomology; (2)Generalized tonic-clonic seizures; and (3) Mixed seizure patterns which include the above or other partial or generalized seizures	2016-10-07
276	lumacaftor/ivacaftor	Orkambi	2014-06-30	Treatment of cystic fibrosis	Designated/Approved	Approved for Orphan Indication	Treatment of cystic fibrosis (CF) in patients age 6 years and older who are homozygous for the F508del mutation in the CFTR gene	2016-09-28
277	canakinumab	Ilaris	2012-09-04	Treatment of TNF-receptor associated periodic syndrome (TRAPS)	Designated/Approved	Approved for Orphan Indication	Indicated for the treatment of Tumor Necrosis Factor Receptor Associated Periodic Syndrome (TRAPS) in adult and pediatric patients	2016-09-23
278	canakinumab	Ilaris	2013-12-05	Treatment of familial mediterranean fever	Designated/Approved	Approved for Orphan Indication	Indicated for treatment of Familial Mediterranean Fever (FMF) in adult and pediatric patients	2016-09-23
279	canakinumab	Ilaris	2013-12-05	Treatment of hyperimmunoglobulinemia D and periodic fever syndrome	Designated/Approved	Approved for Orphan Indication	Indicated for Hyperimmunoglobulin D Syndrome (HIDS)/Mevalonate Kinase Deficiency (MKD) in adult and pediatric patients	2016-09-23
280	eteplirsen	Exondys 51	2007-10-23	Treatment of Duchenne Muscular Dystrophy.	Designated/Approved	Approved for Orphan Indication	Treatment of Duchenne muscular dystrophy (DMD) in patients who have a confirmed mutation of the DMD gene that is amenable to exon 51 skipping	2016-09-19
281	ofatumumab	Arzerra	2009-03-10	Treatment of chronic lymphocytic leukemia	Designated/Approved	Approved for Orphan Indication	Arzerra in combination with fludarabine and cyclophosphamide for the treatment of patients with relapsed chronic lymphocytic leukemia (CLL).	2016-08-30
282	Botulinum toxin type A	Dysport	1999-10-20	Treatment of dynamic muscle contractures in pediatric cerebral palsy patients.	Designated/Approved	Approved for Orphan Indication	Treatment of lower limb spasticity in pediatric patients 2 years of age and older	2016-07-29
283	riboflavin ophthalmic solution ultraviolet-A (UVA) irradiation	Photrexa Viscous	2011-12-02	Treatment of corneal ectasia following refractive surgery	Designated/Approved	Approved for Orphan Indication	Treatment of corneal ectasia following refractive surgery	2016-07-15
284	adalimumab	Humira	2014-05-13	Treatment of non-infectious intermediate, posterior, or panuveitis, or chronic non-infectious anterior uveitis	Designated/Approved	Approved for Orphan Indication	Indicated for the treatment of non-infectious intermediate, posterior and panuveitis in adult patients	2016-06-30
285	Gallium [Ga-68]-N-[(4,7,10-Tricarboxymethyl-1,4,7,10-tetraazacyclododec-1-yl)acetyl]-D-phenylalanyl-L-cysteinyl-L-tyrosyl-D-tryptophanyl-L-lysyl-L-threoninyl-L-cysteinyl-L-threonine-cyclic(2-7)disulfide	Netspot	2013-12-31	Diagnostic for the clinical management of neuroendocrine tumors	Designated/Approved	Approved for Orphan Indication	For use after radiolabeling with Ga 68, with positron emission tomography (PET) for localization of somatostatin receptor positive neuroendocrine tumors (NETs) in adult and pediatric patients.	2016-06-01
286	obeticholic acid	Ocaliva	2008-04-09	Treatment of primary biliary cirrhosis	Designated/Approved	Approved for Orphan Indication	Treatment of primary biliary cholangitis (PBC) in combination with ursodeoxycholic acid (UDCA) in adults with an inadequate response to UDCA, or as monotherapy in adults unable to tolerate UDCA	2016-05-27
287	rosuvastatin	Crestor	2014-02-14	For the treatment of pediatric homozygous familial hypercholesterolemia	Designated/Approved	Approved for Orphan Indication	An adjunct to diet to reduce LDL-C, Total-C, nonHDL-C and ApoB in children and adolescents 7 to 17 years of age with homozygous familial hypercholesterolemia, either alone or with other lipid-lowering treatments (e.g., LDL apheresis).	2016-05-27
288	nivolumab	Opdivo	2014-08-07	Treatment of Hodgkin lymphoma	Designated/Approved	Approved for Orphan Indication	Treatment of adult patients with Classical Hodgkin lymphoma that has relapsed or progressed after autologous hematopoietic stem cell transplantation (HSCT) and brentuximab vedotin	2016-05-17
289	ibrutinib	Imbruvica	2013-05-30	Treatment of small lymphocytic lymphoma	Designated/Approved	Approved for Orphan Indication	Indicated for the treatment of patients with chronic lymphocytic leukemia (CLL)/small lymphocytic lymphoma (SLL) and indicated for the treatment of patients with chronic lymphocytic leukemia (CLL)/small lymphocytic leukemia (SLL) with 17p deletion.	2016-05-06
290	Nitisinone	Orfadin	1995-05-16	Treatment of tyrosinemia type 1.	Designated/Approved	Approved for Orphan Indication	Treatment of hereditary tyrosinemia type 1 in combination with dietary restriction of tyrosine and phenylalanine.	2016-04-22
291	riboflavin ophthalmic solution & ultraviolet A	Photrexa Viscous	2011-09-02	Treatment of keratoconus	Designated/Approved	Approved for Orphan Indication	Indicated for use in corneal collagen crosslinking in combination with the KXL™ System for the treatment of progressive keratoconus	2016-04-15
292	afatinib	Gilotrif	2015-08-03	Treatment of non-small cell lung cancer with squamous histology.	Designated/Approved	Approved for Orphan Indication	Treatment of patients with metastatic, squamous, non-small cell lung cancer progressing after platinum-based chemotherapy	2016-04-15
293	venetoclax	Venclexta	2012-09-20	Treatment of chronic lymphocytic leukemia	Designated/Approved	Approved for Orphan Indication	Treatment of patients with chronic lymphocytic leukemia (CLL) with 17p deletion, as detected by an FDA approved test, who have received at least one prior therapy	2016-04-11
294	methylene blue0.5%	Provayblue	2012-12-18	Treatment of hereditary and acquired methemoglobinemia	Designated/Approved	Approved for Orphan Indication	For treatment of pediatric and adult patients with acquired methemoglobinemia.	2016-04-08
295	defibrotide	Defitelio	2003-05-21	For the treatment of hepatic veno-occlusive disease	Designated/Approved	Approved for Orphan Indication	For the treatment of adult and pediatric patients with hepatic veno-occlusive disease (VOD), also known as sinusoidal obstruction syndrome (SOS), with renal or pulmonary dysfunction following hematopoietic stem cell transplantation (HSCT).	2016-03-30
296	obiltoxaximab	Anthim	2006-06-09	Treatment of exposure to B. anthracis spores	Designated/Approved	Approved for Orphan Indication	Treatment of adult and pediatric patients with inhalational anthrax due to Bacillus anthracis in combination with appropriate antibacterial drugs and for prophylaxis of inhalational anthrax due to B. anthracis when alternative therapies are not available or are not appropriate.	2016-03-18
297	crizotinib	Xalkori	2010-09-13	Treatment of ALK-positive, MET-positive, or ROS-positive non-small cell lung cancer	Designated/Approved	Approved for Orphan Indication	Treatment of patients with metastatic NSCLC whose tumors are ROS1-positive	2016-03-11
298	melphalan	Evomela	2008-11-24	High dose conditioning treatment prior to hematopoietic progenitor (stem) cell transplantation	Designated/Approved	Approved for Orphan Indication	for high-dose conditioning treatment prior to hematopoietic progenitor (stem) cell transplantation in patients with multiple myeloma	2016-03-10
299	recombinant fusion protein linking coagulation factor IX with albumin (rIX-FP)	Idelvion	2012-04-27	Treatment of patients with congenital factor IX deficiency (hemophilia B).	Designated/Approved	Approved for Orphan Indication	Indicated in children and adults with hemophilia B (congenital Factor IX deficiency) for the (1) on-demand control and prevention of bleeding episodes, (2) perioperative management of bleeding, and (3) routine prophylaxis to prevent or reduce the frequency of bleeding episodes.	2016-03-04
300	ibrutinib	Imbruvica	2012-04-06	Treatment of chronic lymphocytic leukemia (CLL)	Designated/Approved	Approved for Orphan Indication	Indicated for the treatment of patients with chronic lymphocytic leukemia	2016-03-04
301	everolimus	Afinitor	2008-02-14	Treatment of neuroendocrine tumors	Designated/Approved	Approved for Orphan Indication	Treatment of adult patients with progressive neuroendocrine tumors of pancreatic origin (PNET) in patients with unresectable, locally advanced or metastatic disease; and treatment of adult patients with progressive, well-differentiated, non-functional, neuroendocrine tumors (NET) of gastrointestinal (GI) or lung origin, with unresectable, locally advanced or metastatic disease.	2016-02-26
302	obinutuzumab	Gazyva	2015-04-15	Treatment of follicular lymphoma	Designated/Approved	Approved for Orphan Indication	GAZYVA, in combination with bendamustine followed by GAZYVA monotherapy, is indicated for the treatment of patients with follicular lymphoma (FL) who relapsed after, or are refractory to, a rituximab-containing regimen	2016-02-26
303	acetylcysteine effervescent tablets for oral solution	Cetylev	2015-02-24	Preventing hepatic injury from acetaminophin overdose	Designated/Approved	Approved for Orphan Indication	Indicated to prevent or lessen hepatic injury after ingestion of a potentially hepatotoxic quantity of acetaminophen in patients with acute ingestion or from repeated supratherapeutic ingestion	2016-01-29
304	eribulin mesylate	Halaven	2012-05-14	Treatment of soft tissue sarcoma	Designated/Approved	Approved for Orphan Indication	Treatment of patients with unresectable or metastatic liposarcoma who have received a prior anthracyclne-containing regimen	2016-01-28
305	ofatumumab	Arzerra	2009-03-10	Treatment of chronic lymphocytic leukemia	Designated/Approved	Approved for Orphan Indication	For extended treatment of patients who are in complete or partial response after at least two lines of therapy for recurrent or progressive CLL.	2016-01-19
306	selexipag	Uptravi	2010-04-30	Treatment of pulmonary arterial hypertension	Designated/Approved	Approved for Orphan Indication	For treatment of pulmonary arterial hypertension (PAH, WHO Group I) to delay disease progression and reduce the risk of hospitalization for PAH	2015-12-21
307	pembrolizumab	Keytruda	2012-11-19	Treatment of Stage IIB through IV malignant melanoma	Designated/Approved	Approved for Orphan Indication	Treatment of patients with unresectable or metastatic melanoma.	2015-12-18
308	uridine triacetate	n/a	2009-05-01	An antidote in the treatment of 5-fluorouracil or capecitabine poisoning	Designated/Approved	Approved for Orphan Indication	For the emergency treatment of adult and pediatric patients following a fluorouracil or capecitabine overdose regardless of the presence of symptoms, or who exhibit early-onset, severe or life-threatening toxicity affecting the cardiac or central nervous system, and/or early-onset, unusually severe adverse reactions (e.g., gastrointestinal toxicity and/or neutropenia) within 96 hours following th…	2015-12-11
309	alectinib	Alecensa	2015-01-27	Treatment of ALK-positive non-small cell lung cancer	Designated/Approved	Approved for Orphan Indication	ALECENSA is indicated for the treatment of patients with anaplastic lymphoma kinase (ALK)-positive, metastatic non-small cell lung cancer (NSCLC) who have progressed on or are intolerant to crizotinib.	2015-12-11
310	sebelipase alfa	Kanuma	2010-07-01	Treatment of lysosomal acid lipase deficiency	Designated/Approved	Approved for Orphan Indication	Indicated for the treatment of patients with a diagnosis of Lysosomal Acid Lipase (LAL) deficiency	2015-12-08
311	recombinant von Willebrand factor (rhVWF)	n/a	2010-11-23	Treatment of von Willebrand disease.	Designated/Approved	Approved for Orphan Indication	Indicated for on-demand treatment and control of bleeding episodes in adults (age 18 and older) diagnosed with von Willebrand disease (VWD)	2015-12-08
312	bendamustine for 50ml admixture	Bendeka	2014-07-02	Treatment of Follicular Lymphoma, Small Lymphocytic Lymphoma, Lymphoplasmacytic Lymphoma, Splenic Marginal Zone Lymphoma, Extranodal Marginal Zone B-cell Lymphoma of Mucosa-Associated Lymphoma Tissue (MALT), and Nodal Marginal Zone Lymphoma (Collectively Indolent B-cell Non-Hodgkin's Lymphoma)	Designated/Approved	Approved for Orphan Indication	Treatment of patients with indolent B-cell non-Hodgkin lymphoma (NHL) that has progressed during or within six months of treatment with rituximab or a rituximab-containing regimen.	2015-12-07
313	bendamustine for 50 ml admixture	Bendeka	2014-07-02	Treatment of chronic lymphocytic leukemia	Designated/Approved	Approved for Orphan Indication	Treatment of patients with chronic lymphocytic leukemia (CLL). Efficacy relative to first line therapies other than chlorambucil has not been established.	2015-12-07
314	elotuzumab	Empliciti	2011-09-01	Treatment of multiple myeloma	Designated/Approved	Approved for Orphan Indication	Indicated in combination with lenalidomide and dexamethasone for the treatment of patients with multiple myeloma who have received one to three prior therapies	2015-11-30
315	necitumumab	n/a	2015-11-20	Treatment of squamous non-small cell lung cancer	Designated/Approved	Approved for Orphan Indication	Use in combination with gemcitabine and cisplatin, for first-line treatment of patients with metastatic, squamous, non-small cell lung cancer. Limitation of Use: PORTRAZZA is not indicated for treatment of non-squamous non-small cell lung cancer.	2015-11-24
316	Anthrax Vaccine Adsorbed	Biothrax	2014-04-11	For post-exposure prophylaxis of anthrax disease resulting from suspected or confirmed Bacillus anthracis exposure	Designated/Approved	Approved for Orphan Indication	For post-exposure prophylaxis of disease following suspected or confirmed Bacillus anthracis exposure, when administered in conjunction with recommended antibacterial drugs.	2015-11-23
317	ixazomib citrate	Ninlaro	2011-02-18	Treatment of multiple myeloma	Designated/Approved	Approved for Orphan Indication	Use in combination with lenalidomide and dexamethasone for the treatment of patients with multiple myeloma who have received at least one prior therapy	2015-11-20
318	daratumumab	Darzalex	2013-05-06	Treatment of multiple myeloma	Designated/Approved	Approved for Orphan Indication	For the treatment of patients with multiple myeloma who have received at least 3 prior lines of therapy including a proteasome inhibitor and an immunomodulatory agent or are double refractory to a proteasome inhibitor and an immunomodulatory agent	2015-11-16
319	Pegfilgrastim	Neulasta	2013-11-20	Treatment of subjects at risk of developing myelosuppression after a radiological or nuclear incident	Designated/Approved	Approved for Orphan Indication	To increase survival in patients acutely exposed to myelosuppressive doses of radiation (Hematopoietic Subsyndrome of Acute Radiation Syndrome)	2015-11-13
320	osimertinib	Tagrisso	2014-09-04	Treatment of epidermal growth factor receptor mutation-positive non-small cell lung cancer	Designated/Approved	Approved for Orphan Indication	For treatment of patients with metastatic epidermal growth factor receptor (EGFR) T790M mutation-positive non-small cell lung cancer (NSCLC), as detected by an FDA-approved test, who have progressed on or after EGFR TKI therapy	2015-11-13
321	cobimetinib	n/a	2014-01-31	Treatment of stage IIb, IIc, III, and IV melanoma with BRAFV600 mutation	Designated/Approved	Approved for Orphan Indication	For the treatment of patients with unresectable or metastatic melanoma with BRAF V600E or V600K mutation, in combination with vemurafenib. Limitations of Use: COTELLIC is not indicated for treatment of patients with wild-type BRAF melanoma.	2015-11-10
322	ipilimumab	Yervoy	2004-06-03	Treatment of high risk Stage II, Stage III, and Stage IV melanoma	Designated/Approved	Approved for Orphan Indication	For the adjuvant treatment of patients with cutaneous melanoma with pathologic involvement of regional lymph nodes of more than 1 mm, who have undergone complete resection including total lymphadenectomy.	2015-10-28
323	talimogene laherparepvec	Imlygic	2011-03-14	Treatment of stage IIb-stage IV melanoma	Designated/Approved	Approved for Orphan Indication	Indicated for the local treatment of unresectable cutaneous, subcutaneous, and nodal lesions in patients with melanoma recurrent after initial surgery	2015-10-27
324	trabectedin	Yondelis	2004-09-30	Treatment of soft tissue sarcoma	Designated/Approved	Approved for Orphan Indication	For the treatment of patients with unresectable or metastatic liposarcoma or leiomyosarcoma who received a prior anthracycline-containing regimen	2015-10-23
325	Asfotase alfa	Strensiq	2008-09-12	Treatment of hypophosphatasia	Designated/Approved	Approved for Orphan Indication	For the treatment of patients with perinatal/infantile-and juvenile-onset hypophosphatasia (HPP)	2015-10-23
326	irinotecan liposome injection	n/a	2011-07-21	Treatment of pancreatic cancer	Designated/Approved	Approved for Orphan Indication	For use in combination with fluorouracil and leucovorin, for the treatment of patients with metastatic adenocarcinoma of the pancreas that has progressed following gemcitabine-based therapy	2015-10-22
327	Coagulation factor X (human)	Coagadex	2007-11-08	Treatment of hereditary factor X deficiency	Designated/Approved	Approved for Orphan Indication	Treatment of adults and adolescents (aged 12 years and above) with hereditary Factor X deficiency for on-demand treatment and control of bleeding episodes and perioperative management of bleeding in patients with mild hereditary Factor X deficiency	2015-10-20
328	idarucizumab	n/a	2015-05-28	To reverse the anticoagulant effect of dabigatran due to uncontrolled life-threatening bleeding requiring urgent intervention or a need to undergo an emergency surgery/urgent invasive procedure	Designated/Approved	Approved for Orphan Indication	For use in patients treated with Pradaxa® when reversal of the anticoagulant effects of dabigatran is needed for emergency surgery/urgent procedures and in life-threatening or uncontrolled bleeding	2015-10-16
329	Combination of nivolumab and ipilimumab	n/a	2014-10-09	Treatment of Stage IIb to Stage IV melanoma	Designated/Approved	Approved for Orphan Indication	Treatment of patients with BRAF V600 wild-type, unresectable or metastatic melanoma	2015-09-30
330	adalimumab	Humira	2015-05-13	Treatment of moderate to severe hidradenitis suppurativa (Hurley stage 2 and Hurley stage 3 disease)	Designated/Approved	Approved for Orphan Indication	Treatment of moderate to severe hidradenitis suppurativa	2015-09-09
331	uridine triacetate	n/a	2013-08-09	Treatment of hereditary orotic aciduria	Designated/Approved	Approved for Orphan Indication	Treatment of hereditary orotic aciduria	2015-09-04
332	evolocumab	Repatha	2013-09-12	Treatment of homozygous familial hypercholesterolemia	Designated/Approved	Approved for Orphan Indication	As an adjunct to diet and other LDL-lowering therapies (e.g., statins, ezetimibe, LDL apheresis) in patients with HoFH who require additional lowering of LDL-C.	2015-08-27
333	brentuximab vedotin	Adcetris	2007-01-30	Treatment of Hodgkin's lymphoma	Designated/Approved	Approved for Orphan Indication	Treatment of patients with classical Hodgkin lymphoma at high risk of relapse or progression as post-autologous hematopoietic stem cell transplantation (auto-HSCT) consolidation.	2015-08-17
334	cysteamine enteric coated	Procysbi	2006-10-24	Treatment of cystinosis	Designated/Approved	Approved for Orphan Indication	PROCYSBI is indicated for the treatment of nephropathic cystinosis in adult and pediatric patients 2 years of age and older.	2015-08-14
335	dichlorphenamide	n/a	2010-09-02	Treatment of primary periodic paralyses	Designated/Approved	Approved for Orphan Indication	Treatment of primary hyperkalemic periodic paralysis, primary hypokalemic period paralysis, and related variants	2015-08-07
336	gefitinib	Iressa	2014-08-26	Treatment of epidermal growth factor receptor mutation-positive non-small cell lung cancer	Designated/Approved	Approved for Orphan Indication	For the first-line treatment of patients with metastatic non-small cell lung cancer (NSCLC) whose tumors have epidermal growth factor receptor (EGFR) exon 19 deletions or exon 21 (L858R) substitution mutations as detected by an FDA-approved test	2015-07-13
337	tacrolimus	Envarsus Xr	2013-12-20	Prophylaxis of organ rejection in patients receiving allogeneic kidney transplant	Designated/Approved	Approved for Orphan Indication	Prophylaxis of organ rejection in kidney transplant patients converted from tacrolimus immediate-release formulations in combination with other immunosuppressants	2015-07-10
338	lumacaftor/ivacaftor	Orkambi	2014-06-30	Treatment of cystic fibrosis	Designated/Approved	Approved for Orphan Indication	Treatment of cystic fibrosis in patients age 12 years and older who are homozygous for F508del mutation in the CFTR gene	2015-07-02
339	sirolimus	Rapamune	2012-10-31	Treatment of lymphangioleiomyomatosis	Designated/Approved	Approved for Orphan Indication	Treatment of lymphangioleiomyomatosis (LAM)	2015-05-28
340	Antivenin crotaline (pit-viper) equine immune F(ab)2)	Anavip	2004-01-29	Treatment of envenomation by Crotaline snakes	Designated/Approved	Approved for Orphan Indication	Management of adult and pediatric patients with North American rattlesnake envenomation	2015-05-06
341	filgrastim	Neupogen	2013-11-20	Treatment of subjects at risk of developing myelosuppression after a radiological or nuclear incident	Designated/Approved	Approved for Orphan Indication	To increase survival in patients acutely exposed to myelosuppressive doses of radiation (Hematopoietic Syndrome of Acute Radiation Syndrome).	2015-03-30
342	anthrax immune globulin (human)	n/a	2008-07-29	Treatment of inhalational anthrax	Designated/Approved	Approved for Orphan Indication	Treatment of inhalational anthrax in adult and pediatric patients in combination with appropriate antibacterial drugs	2015-03-24
343	cholic acid	Cholbam	2003-07-18	Treatment of inborn errors of cholesterol and bile acid synthesis and metabolism	Designated/Approved	Approved for Orphan Indication	Treatment of bile acid synthesis disorders due to single enzyme defects	2015-03-17
344	ivacaftor	Kalydeco	2006-12-20	Treatment of patients with cystic fibrosis	Designated/Approved	Approved for Orphan Indication	Treatment of cystic fibrosis (CF) in patients age 2 years and older who have one of the following mutations in the CFTR gene: G551D, G1244E, G1349D, G178R, G551S, S1251N, S1255P, S549N, or S549R ; and treatment of CF in patients age 2 years and older who have an R117H mutation in the CFTR gene.	2015-03-17
345	dinutuximab	Unituxin	2010-12-20	Treatment of neuroblastoma	Designated/Approved	Approved for Orphan Indication	For use in combination with granulocyte-macrophage colony-stimulating factor (GM-CSF), interleukin-2 (IL-2) and 13-cis-retinoic acid (RA), for the treatment of pediatric patients with high-risk neuroblastoma who achieve at least a partial response to prior first-line multiagent, multimodality therapy	2015-03-10
346	isavuconazonium sulfate	Cresemba	2013-05-06	Treatment of invasive aspergillosis	Designated/Approved	Approved for Orphan Indication	Treatment of invasive aspergillosis in patients 18 years of age and older	2015-03-06
347	isavuconazonium sulfate	Cresemba	2013-10-25	Treatment of zygomycosis	Designated/Approved	Approved for Orphan Indication	Treatment of invasive mucormycosis in patients 18 years of age and older	2015-03-06
348	panobinostat	Farydak	2012-08-20	Treatment of multiple myeloma	Designated/Approved	Approved for Orphan Indication	FARYDAK (panobinostat) in combination with bortezomib (BTZ) and dexamethasone (DEX) for the treatment of patients with multiple myeloma who have received at least 2 prior regimens, including bortezomib and an immunomodulatory agent	2015-02-23
349	lenalidomide	Revlimid	2001-09-20	Treatment of multiple myeloma	Designated/Approved	Approved for Orphan Indication	REVLIMID in combination with dexamethasone is indicated for the treatment of patients with multiple myeloma (MM).	2015-02-17
350	lenvatinib	Lenvima	2012-12-27	Treatment of follicullar, medullary, anaplastic, and metastatic or locally advanced papillary thyroid cancer	Designated/Approved	Approved for Orphan Indication	Treatment of patients with locally recurrent or metastatic, progressive, radioactive iodine refractory differentiated thyroid cancer	2015-02-13
351	ibrutinib	Imbruvica	2013-10-15	Treatment of Waldenstrom's macroglobulinemia	Designated/Approved	Approved for Orphan Indication	Treatment of patients with Waldenstrom's macroglobulinemia	2015-01-29
352	parathyroid hormone	Natpara	2007-08-31	Treatment of hypoparathyroidism	Designated/Approved	Approved for Orphan Indication	An adjunct to calcium and vitamin D to control hypocalcemia in patients with hypoparathyroidism	2015-01-23
353	phoxillum	n/a	2014-02-14	For use as a replacement solution in patients undergoing continuous renal replacement therapy	Designated/Approved	Approved for Orphan Indication	As a replacement solution in Continuous Renal Replacement Therapy (CRRT) and in case of drug poisoning when CRRT is used to remove dialzable substances	2015-01-13
354	levodopa and carbidopa	Duopa	2000-01-18	Treatment of late stage Parkinson's disease	Designated/Approved	Approved for Orphan Indication	Treatment of motor flucuations in patients with advanced Parkinson's disease	2015-01-09
355	ivacaftor	Kalydeco	2006-12-20	Treatment of patients with cystic fibrosis	Designated/Approved	Approved for Orphan Indication	Treatment of cystic fibrosis (CF) in patients age 6 years and older who have one of the following mutations in the CFTR gene: G551D, G1244E, G1349D, G178R, G551S, S1251N, S1255P, S549N, or S549R; and treatment of CF in patients age 6 years and older who have an R117H mutation in the CFTR gene.	2014-12-29
356	nivolumab	Opdivo	2013-01-23	Treatment of Stage IIb to IV melanoma	Designated/Approved	Approved for Orphan Indication	Treatment of patients with unresectable or metastatic melanoma and disease progression following ipilimumab and, if BRAF V600 mutation positive, a BRAF inhibitor	2014-12-22
357	olaparib	Lynparza	2013-10-16	Treatment of ovarian cancer	Designated/Approved	Approved for Orphan Indication	Indicated as monotherapy in patients with deleterious or suspected deleterious germline BRCA mutated (as detected by an FDA-approved test) advanced ovarian cancer who have been treated with three or more prior lines of chemotherapy	2014-12-19
358	lanreotide acetate	Somatuline Depot	2011-08-25	Treatment of neuroendocrine tumors	Designated/Approved	Approved for Orphan Indication	Treatment of patients with unresectable,well- or moderately-differentiated locally advanced or metastatic gastroenteropancreatic neuroendocrine tumors to improve progression-free survival	2014-12-16
359	pasireotide	n/a	2009-08-25	Treatment of acromegaly	Designated/Approved	Approved for Orphan Indication	Treatment of patients with acromegaly who have had an inadequate response to surgery and/or for whom surgery is not an option	2014-12-15
360	aripiprazole	Abilify	2006-01-25	Treatment of Tourette's syndrome	Designated/Approved	Approved for Orphan Indication	Treatment of pediatric patients with Tourette's	2014-12-12
361	denosumab	Xgeva	2013-09-11	Treatment of hypercalcemia in malignancy	Designated/Approved	Approved for Orphan Indication	To treat hypercalcemia of malignancy refractory to biphosphonate therapy.	2014-12-05
362	ruxolitinib	Jakafi	2010-03-26	Treatment of polycythemia vera	Designated/Approved	Approved for Orphan Indication	Treatment of patients with polycythemia vera who have had an inadequate response to or are intolerant of hydroxyurea.	2014-12-04
363	blinatumomab	Blincyto	2008-05-16	Treatment of acute lymphocytic leukemia	Designated/Approved	Approved for Orphan Indication	Treatment of Philadelphia chromosome-negative relapsed or refractory B-cell precursor acute lymphoblastic leukemia (ALL).	2014-12-03
364	cinacalcet	Sensipar	2010-04-30	Treatment of hypercalcemia in patients with primary hyperparathyroidism for whom parathyroidectomy would be indicated on the basis of serum calcium levels, but who are unable to undergo surgery	Designated/Approved	Approved for Orphan Indication	Treatment of hypercalcemia in adult patients with primary hyperparathyroidism for whom parathyroidectomy would be indicated on the basis of serum calcium levels, but who are unable to undergo parathyroidectomy.	2014-11-21
365	bevacizumab	Avastin	2006-02-09	Therapeutic treatment of patients with ovarian cancer	Designated/Approved	Approved for Orphan Indication	In combination with paclitaxel, pegylated liposomal doxorubicin, or topotecan for treatment of patients with platinum-resistant, recurrent epithelial ovarian, fallopian tube, or primary peritoneal cancer who received no more than 2 prior chemotherapy regimens	2014-11-14
366	bevacizumab	Avastin	2010-11-02	Treatment of primary peritoneal carcinoma.	Designated/Approved	Approved for Orphan Indication	In combination with paclitaxel, pegylated liposomal doxorubicin, or topotecan for treatment of patients with platinum-resistant, recurrent epithelial ovarian, fallopian tube, or primary peritoneal cancer who received no more than 2 prior chemotherapy regimens	2014-11-14
367	bevacizumab	Avastin	2010-11-23	Treatment of fallopian tube carcinoma	Designated/Approved	Approved for Orphan Indication	In combination with paclitaxel, pegylated liposomal doxorubicin, or topotecan for treatment of patients with platinum-resistant, recurrent epithelial ovarian, fallopian tube, or primary peritoneal cancer who have received no more than 2 prior chemotherapy regimens.	2014-11-14
368	ramucirumab	Cyramza	2012-02-16	Treatment of gastric cancer	Designated/Approved	Approved for Orphan Indication	Treatment of advanced gastric or gastro-esophageal junction adenocarcinoma, as a single agent or in combination with paclitaxel, after prior fluoropyrimidine- or platinium-containing chemotherapy.	2014-11-05
369	antihemophilic factor (recombinant), porcine sequence	Obizur	2004-03-16	Treatment and prevention of episodic bleeding in patients with inhibitor antibodies to human coagulation factor VIII	Designated/Approved	Approved for Orphan Indication	Treatment of bleeding episodes in adults with acquired hemophilia A.	2014-10-23
370	pirfenidone	Esbriet	2004-03-05	Treatment of idiopathic pulmonary fibrosis	Designated/Approved	Approved for Orphan Indication	Treatment of idiopathic pulmonary fibrosis	2014-10-15
371	nintedanib	Ofev	2011-06-29	Treatment of patients with idiopathic pulmonary fibrosis.	Designated/Approved	Approved for Orphan Indication	Treatment of idiopathic pulmonary fibrosis	2014-10-15
372	bortezomib	Velcade	2012-05-30	Treatment of mantle cell lymphoma.	Designated/Approved	Approved for Orphan Indication	Treatment of patients with mantle cell lymphoma.	2014-10-08
373	adalimumab	Humira	2005-03-21	Treatment of juvenile rheumatoid arthritis	Designated/Approved	Approved for Orphan Indication	Reducing signs and symptoms of moderately to severely active polyarticular juvenile idiopathic arthritis in patients 2 years of age and older.	2014-09-30
374	adalimumab	Humira	2006-10-19	Treatment of pediatric Crohn's disease	Designated/Approved	Approved for Orphan Indication	Reducing signs and symptoms and inducing and maintaining clinical remission in patients 6 years of age and older with moderately to severely active Crohn's disease who have had an inadequate response to corticosteroids or immunomodulators such as azathioprine, 6-mercaptopurine, or methotrexate.	2014-09-23
375	pembrolizumab	Keytruda	2012-11-19	Treatment of Stage IIB through IV malignant melanoma	Designated/Approved	Approved for Orphan Indication	Treatment of patients with unresectable or metastatic melanoma and disease progression following ipilimumab and, if BRAF V600 mutation positive, a BRAF inhibitor.	2014-09-04
376	eltrombopag	Promacta	2013-11-08	Treatment of aplastic anemia	Designated/Approved	Approved for Orphan Indication	Treatment of patients with severe aplastic anemia who have had an insufficient response to immunosuppressive therapy.	2014-08-26
377	eliglustat	Cerdelga	2008-09-17	Treatment of Type I Gaucher disease	Designated/Approved	Approved for Orphan Indication	Long-term treatment of adult patients with Gaucher disease type 1 who are CYP2D6 extensive metabolizers (EMs), intermediate metabolizers (IMs), or poor metabolizers (PMs) as detected by an FDA-cleared test.	2014-08-19
378	Recombinant human acid alpha-glucosidase; alglucosidase alfa	1. Myozyme 2. Lumizyme	1997-08-19	Treatment of glycogen storage disease type II.	Designated/Approved	Approved for Orphan Indication	(Lumizyme) Patients with Pompe disease (acid alpha-glucosidase (GAA deficiency)).	2014-08-01
379	ibrutinib	Imbruvica	2012-04-06	Treatment of chronic lymphocytic leukemia (CLL)	Designated/Approved	Approved for Orphan Indication	Treatment of patients with chronic lymphocytic leukemia (CLL) who have received at least one prior therapy and treatment of patients with chronic lymphocytic leukemia (CLL) with 17p deletion	2014-07-28
380	idelalisib	Zydelig	2013-09-26	Treatment of follicular lymphoma	Designated/Approved	Approved for Orphan Indication	Zydelig is indicated for the treatment of patients with relapsed follicular B-cell non-Hodgkin lymphoma (FL) who have received at least two prior systemic therapies.	2014-07-23
381	idelalisib	Zydelig	2013-10-15	Treatment of chronic lymphocytic leukemia and small lymphocytic lymphoma	Designated/Approved	Approved for Orphan Indication	Zydelig is indicated, in combination with rituximab, for the treatment of patients with relapsed chronic lymphocytic leukemia (CLL) for whom rituximab alone would be considered appropriate therapy due to other co-morbidities; and Zydelig is indicated for the treatment of patients with relapsed small lymphocytic lymphoma (SLL) who have received at least two prior systemic therapies.	2014-07-23
382	dantrolene sodium suspension for injection	Ryanodex	2013-08-16	Treatment of malignant hyperthermia syndrome	Designated/Approved	Approved for Orphan Indication	Treatment of malignant hyperthermia in conjunction with appropriate supportive measures and for the prevention of malignant hyperthermia in patients at high risk.	2014-07-22
383	C1-esterase inhibitor (recombinant)	Ruconest	1999-02-23	Treatment of (acute attacks of) angioedema caused by hereditary or acquired C1-esterase inhibitor deficiency.	Designated/Approved	Approved for Orphan Indication	Treatment of acute attacks of hereditary angioedema (HAE) in adult and adolescent patients.	2014-07-16
384	Belinostat	Beleodaq	2009-09-03	Treatment of peripheral T-cell lymphoma (PTCL).	Designated/Approved	Approved for Orphan Indication	Treatment of patients with relapsed or refractory peripheral T-cell lymphoma	2014-07-03
385	coagulation factor VIIa (recombinant)	Novoseven Rt	2004-06-18	Treatment of bleeding episodes in Glanzmann's thrombasthenia	Designated/Approved	Approved for Orphan Indication	Treatment of bleeding episodes and peri-operative management in adults and children with Glanzmann's thrombasthenia with refractoriness to platelet transfusions, with or without antibodies to platelets.	2014-07-02
386	technetium Tc 99m tilmanocept	Lymphoseek	2014-09-17	Use in sentinel lymph node detection (SLN) with a hand-held gamma-counter, with scintigraphic imaging, in patients with cancer of the head and neck	Designated/Approved	Approved for Orphan Indication	Guiding sentinel lymph node biopsy, using a hand-held gamma counter in patients with clinically node negative squamous cell carcinoma of the oral cavity.	2014-06-13
387	antihemophilic factor (recombinant), Fc fusion protein	Eloctate	2010-11-23	Treatment of hemophilia A	Designated/Approved	Approved for Orphan Indication	Indicated in adults and children with Hemophilia A (congenital Factor VIII deficiency) for on-demand treatment and control of bleeding episodes, perioperative management of bleeding, and routine prophylaxis to reduce the frequency of bleeding episodes.	2014-06-06
388	ceritinib	Zykadia	2013-09-27	Treatment of patients with non-small cell lung cancer (NSCLC) that is anaplastic lymphoma kinase(ALK)-positive	Designated/Approved	Approved for Orphan Indication	ZYKADIA is indicated for the treatment of patients with anaplastic lymphoma kinase (ALK)-positive metastatic nonsmall cell lung cancer (NSCLC) who have progressed on or are intolerant to crizotinib.	2014-04-29
389	mercaptopurine oral solution	Purixan	2012-08-20	Treatment of acute lymphoblastic leukemia in pediatric patients	Designated/Approved	Approved for Orphan Indication	Treatment of patients with acute lymphoblastic leukemia as part of a combination regimen.	2014-04-28
390	siltuximab	Sylvant	2006-05-26	Treatment of Castleman's disease	Designated/Approved	Approved for Orphan Indication	Treatment of patients with multicentric Castleman's disease (MCD) who are human immunodeficiency virus (HIV) negative and human herpesvirus-8 (HHV-8) negative.	2014-04-23
391	ramucirumab	Cyramza	2012-02-16	Treatment of gastric cancer	Designated/Approved	Approved for Orphan Indication	CYRAMZA as a single-agent is indicated for the treatment of patients with advanced or metastatic, gastric or gastro-esophageal junction adenocarcinoma with disease progression on or after prior fluoropyrimidine- or platinum-containing chemotherapy.	2014-04-21
392	ofatumumab	Arzerra	2009-03-10	Treatment of chronic lymphocytic leukemia	Designated/Approved	Approved for Orphan Indication	ARZERRA (ofatumumab) is indicated, in combination with chlorambucil, for the treatment of previously untreated patients with chronic lymphocytic leukemia (CLL) for whom fludarabine-based therapy is considered inappropriate.	2014-04-17
393	ethiodized oil injection	Lipiodol	2013-09-26	Management of patients with known hepatocellular carcinoma (HCC)	Designated/Approved	Approved for Orphan Indication	Selective hepatic intra-arterial use for imaging tumors in adults with known hepatocellular carcinoma (HCC)	2014-04-04
394	ecallantide	Kalbitor	2003-02-04	Treatment of angioedema	Designated/Approved	Approved for Orphan Indication	Treatment of acute attacks of hereditary angioedema (HAE) in patients 12 years of age and older	2014-03-28
395	Coagulation factor IX (recombinant), Fc fusion protein	Alprolix	2008-10-30	Control and prevention of hemorrhagic episodes in patients with hemophilia B (congenital factor IX deficiency or Christmas disease)	Designated/Approved	Approved for Orphan Indication	Adults and children with Hemophilia B for control and prevention of bleeding episodes, perioperative management, and routine prophylaxis to prevent or reduce the frequency of bleeding episodes.	2014-03-28
396	miltefosine	Impavido	2006-10-10	Treatment of leishmaniasis.	Designated/Approved	Approved for Orphan Indication	Treatment of visceral leishmaniasis due to Leishmania donovani; cutaneous leishmaniasis due to Leishmania braziliensis, Leishmania guyanensis, and Leishmania panamensis; and mucosal leishmaniasis due to Leishmania braziliensis.	2014-03-19
397	propranolol	Hemangeol	2008-09-05	Treatment of proliferating infantile hemangiomas requiring systemic therapy	Designated/Approved	Approved for Orphan Indication	Treatment of proliferating infantile hemangioma requiring systemic therapy.	2014-03-14
398	metreleptin	Myalept	2001-08-22	Treatment of metabolic disorders secondary to lipodystrophy	Designated/Approved	Approved for Orphan Indication	Adjunct to diet as replacement therapy to treat the complications of leptin deficiency in patients with congenital or acquired generalized lipodystrophy.	2014-02-24
399	ivacaftor	Kalydeco	2006-12-20	Treatment of patients with cystic fibrosis	Designated/Approved	Approved for Orphan Indication	Treatment of cystic fibrosis (CF) in patients age 6 years and older who have one of the following mutations in the CFTR gene: G551D, G1244E, G1349D, G178R, G551S, S1251N, S1255P, S549N, or S549R.	2014-02-21
400	droxidopa	Northera	2007-01-17	Treatment of neurogenic symptomatic orthostatic hypotension in patients with primary autonomic failure, dopamine-beta-hydroxylase deficiency, and nondiabetic autonomic neuropathy.	Designated/Approved	Approved for Orphan Indication	Treatment of orthostatic dizziness, lightheadedness, or the "feeling that you are about to black out" in adult patients with symptomatic neurogenic orthostatic hypotension caused by primary autonomic failure (Parkinson's disease, multiple system atrophy, and pure autonomic failure), dopamine beta-hydroxylase deficiency, and non-diabetic autonomic neuropathy.	2014-02-18
401	elosulfase alfa	Vimizim	2009-05-15	Use in the treatment of mucopolysaccharidosis (MPS) Type IV A (Morquio A syndrome)	Designated/Approved	Approved for Orphan Indication	Patients with Mucopolysaccharidosis type IVA (MPS IVA; Morquio A syndrome)	2014-02-14
402	ibrutinib	Imbruvica	2012-04-06	Treatment of chronic lymphocytic leukemia (CLL)	Designated/Approved	Approved for Orphan Indication	Treatment of patients with chronic lymphocytic leukemia (CLL) who have received at least one prior therapy	2014-02-12
403	tasimelteon	Hetlioz	2010-01-19	Non-24-hour sleepwake disorder in blind individuals without light perception	Designated/Approved	Approved for Orphan Indication	Treatment of non-24-hour sleep-wake disorder	2014-01-31
404	trametinib and dabrafenib	Mekinist And Tafinlar	2012-09-20	Treatment of Stage IIb through IV melanoma.	Designated/Approved	Approved for Orphan Indication	MEKINIST (trametinib) in combination with dabrafenib for treatment of patients with unresectable or metastatic melanoma with BRAF V600E or V600K mutations as detected by an FDA-approved test. This indication is based on the demonstration of durable response rate. Improvement in disease-related symptoms or overall survival has not been demonstrated for MEKINIST in combination with dabrafenib.	2014-01-08
405	trametinib and dabrafenib	Mekinist And Tafinlar	2012-09-20	Treatment of Stage IIb through IV melanoma.	Designated/Approved	Approved for Orphan Indication	TAFINLAR (dabrafenib) in combination with trametinib for treatment of patients with unresectable or metastatic melanoma with BRAF V600E or V600K mutations as detected by an FDA-approved test. This indication is based on the demonstration of durable response rate. Improvement in disease-related symptoms or overall survival has not been demonstrated for TAFINLAR in combination with trametinib.	2014-01-08
406	coagulation factor XIII A-subunit (recombinant)	Tretten	2003-11-06	Prophylaxis of bleeding associated with congential factor XIII deficiency	Designated/Approved	Approved for Orphan Indication	Routine prophylaxis of bleeding in patients with congenital Factor XIII A-subunit deficiency.	2013-12-23
407	anti-inhibitor coagulant complex	Feiba	2013-04-12	Routine prophylaxis to prevent or reduce the frequency of bleeding episodes in hemophilia A and B patients with inhibitors	Designated/Approved	Approved for Orphan Indication	Routine prophylaxis to prevent or reduce the frequency of bleeding episodes in hemophilia A and B patients with inhibitors	2013-12-16
408	prothrombin complex concentrate (human)	Kcentra	2012-12-27	Treatment of patients needing urgent reversal of Vitamin K antagonist therapy for treatment of major bleeding and/or surgical procedures	Designated/Approved	Approved for Orphan Indication	Urgent reversal of acquired coagulation factor deficiency induced by vitamin K antagonist (VKA, e.g., warfarin) therapy in adult patients with acute major bleeding or need for an urgent surgery/invasive procedure.	2013-12-13
409	collagenase clostridium histolyticum	Xiaflex	1996-03-12	Treatment of Peyronie's disease.	Designated/Approved	Approved for Orphan Indication	Treatment of adult men with Peyronie's disease with a palpable plaque and curvature deformity of at least 30 degrees at the start of therapy.	2013-12-06
410	sorafenib	Nexavar	2011-12-12	Treatment of medullary thyroid cancer, anaplastic thyroid cancer, and recurrent or metastatic follicular or papillary thyroid cancer	Designated/Approved	Approved for Orphan Indication	Treatment of patients with locally recurrent or metastatic, progressive, differentiated thyroid carcinoma (DCT) that is refractory to radioactive iodine treatment.	2013-11-22
411	ibrutinib	Imbruvica	2012-12-03	Treatment of mantle cell lymphoma	Designated/Approved	Approved for Orphan Indication	Treatment of patients with mantle cell lymphoma (MCL) who have received at least one prior therapy	2013-11-13
412	obinutuzumab	Gazyva	2012-02-17	Treatment of chronic lymphocytic leukemia	Designated/Approved	Approved for Orphan Indication	GAZYVA, in combination with chlorambucil, is indicated for the treatment of patients with previously untreated chronic lymphocytic leukemia (CLL).	2013-11-01
413	macitentan	Opsumit	2009-09-03	Treatment of pulmonary arterial hypertension	Designated/Approved	Approved for Orphan Indication	Treatment of pulmonary arterial hypertension (PAH, WHO Group 1) to delay disease progression. Disease progression included: death, initiation of intravenous (IV) or subcutaneous prostanoids, or clinical worsening of PAH (decreased 6-minute walk distance, worsened PAH symptoms and need for additional PAH treatment). Opsumit also reduced hospitalization for PAH.	2013-10-18
414	riociguat	Adempas	2013-09-19	Treatment of pulmonary arterial hypertension.	Designated/Approved	Approved for Orphan Indication	Treatment of adults with pulmonary arterial hypertension (PAH) WHO Group 1, to improve exercise capacity, WHO functional class and to delay clinical worsening.	2013-10-08
415	riociguat	Adempas	2013-09-19	Treatment of chronic thromboembolic pulmonary hypertension	Designated/Approved	Approved for Orphan Indication	Treatment of adults with persistent/recurrent chronic thromboembolic pulmonary hypertension (CTEPH) WHO Group 4, after surgical treatment, or inoperable CTEPH, to improve exercise capacity and WHO functional class	2013-10-08
416	paclitaxel protein-bound particles	Abraxane	2009-09-03	Treatment of pancreatic cancer.	Designated/Approved	Approved for Orphan Indication	Treatment of metastatic adenocarcinoma of the pancreas as first-line treatment, in combination with gemcitabine.	2013-09-06
417	meclorethamine	Valchlor	2004-08-17	Treatment of mycosis fungoides	Designated/Approved	Approved for Orphan Indication	Topical treatment of Stage 1A and 1B mycosis fungoides-type cutaneous T-cell lymphoma in patients who have received prior skin-directed therapy.	2013-08-23
418	afatinib	Gilotrif	2012-12-03	Treatment of epidermal growth factor receptor (EGFR) mutation-positive non-small cell lung cancer (NSCLC).	Designated/Approved	Approved for Orphan Indication	First-line treatment of patients with metastatic non-small cell lung cancer (NSCLC) whose tumors have epidermal growth factor receptor (EGFR) exon 19 deletions or exon 21 (L858R) substitution mutations as detected by an FDA-approved test.	2013-07-12
419	coagulation factor IX (recombinant)	Rixubis	2012-10-31	Prophylactic use to prevent or reduce the frequency of bleeding episodes in patients with hemophilia B (routine prophylaxis in patients where there is no evidence or suspicion of bleeding)	Designated/Approved	Approved for Orphan Indication	Adults with Hemophilia B for (1) control and prevention of bleeding episodes, (2) perioperative management, and (3) routine prophylaxis to prevent or reduce the frequency of bleeding episodes.	2013-06-26
420	denosumab	Xgeva	2010-12-20	Treatment of patients with giant cell tumor of bone	Designated/Approved	Approved for Orphan Indication	Treatment of adults and skeletally mature adolescents with giant cell tumor of bone that is unresectable or where surgical resection is likely to result in severe morbidity.	2013-06-13
421	lenalidomide	Revlimid	2009-04-27	Treatment of mantle cell lymphoma	Designated/Approved	Approved for Orphan Indication	Treatment of mantle cell lymphoma whose disease has relapsed or progressed after two prior therapies, one of which included bortezomib.	2013-06-05
422	trametinib	Mekinist	2010-12-20	Treatment of Stage IIb through Stage IV melanoma	Designated/Approved	Approved for Orphan Indication	Treatment of patients with unresectable or metastatic melanoma with BRAF V600E or V600K mutations as detected by an FDA approved test.	2013-05-29
423	dabrafenib	Tafinlar	2011-01-12	Treatment BRAF V600 mutation positive Stage IIB through IV melanoma	Designated/Approved	Approved for Orphan Indication	Treatment of patients with unresectable or metastatic melanoma with BRAF V600E mutation as detected by an FDA approved test.	2013-05-29
424	Japanese encephalitis vaccine, inactivated, adsorbed	Ixiaro	2012-09-25	Prevention of Japanese encephalitis virus in pediatric patients.	Designated/Approved	Approved for Orphan Indication	IXIARO is a vaccine indicated for the prevention of disease caused by Japanese encephalitis virus (JEV). IXIARO is approved for use in individuals 2 months of age and older.	2013-05-17
425	nimodipine	Nymalize	2011-09-16	Treatment of subarachnoid hemorrhage.	Designated/Approved	Approved for Orphan Indication	Improvement of neurological outcome by reducing the incidence and severity of ischemic deficits in adult patients with subarachnoid hemorrhage (SAH) from ruptured intracranial berry aneurysms regardless of their post-ictus neurological condition (i.e., Hunt and Hess Grades I-V).	2013-05-10
426	canakinumab	Ilaris	2008-09-30	Treatment of pediatric (age 16 and under) juvenile rheumatoid arthritis.	Designated/Approved	Approved for Orphan Indication	Treatment of active Systemic Juvenile Idiopathic Arthritis (SJIA) in patients aged 2 years and older.	2013-05-09
427	cysteamine enteric coated	Procysbi	2006-10-24	Treatment of cystinosis	Designated/Approved	Approved for Orphan Indication	PROCYSBI is indicated for the management of nephropathic cystinosis in adults and children ages 6 years and older.	2013-04-30
428	prothrombin complex concentrate (human)	Kcentra	2012-12-27	Treatment of patients needing urgent reversal of Vitamin K antagonist therapy for treatment of major bleeding and/or surgical procedures	Designated/Approved	Approved for Orphan Indication	Urgent reversal of acquired coagulation factor deficiency induced by Vitamin K antagonist (VKA, e.g., warfarin) therapy in adult patients with acute major bleeding.	2013-04-29
429	tocilizumab	Actemra	2012-07-31	Treatment of pediatric patients (age 16 years and younger) with polyarticular-course juvenile idiopathic arthritis	Designated/Approved	Approved for Orphan Indication	ACTEMRA® (tocilizumab) is indicated for the treatment of active polyarticular juvenile idiopathic arthritis in patients 2 years of age and older.	2013-04-29
430	botulism antitoxin heptavalent (A, B, C, D, E, F, G) (Equine)	n/a	2011-06-29	Treatment of botulism.	Designated/Approved	Approved for Orphan Indication	Treatment of symptomatic botulism following documented or suspected exposure to botulinum neurotoxin (BoNT) serotypes A, B, C, D, E, F or G in adults and pediatric patients.	2013-03-22
431	immune globulin intravenous (human)	Gammaplex	2011-04-29	Treatment of idiopathic thrombocytopenic purpura (also known as primary immune thrombocytopenia)	Designated/Approved	Approved for Orphan Indication	Idiopathic thrombocytopenic purpura	2013-03-08
432	regorafenib	Stivarga	2011-01-12	Treatment gastrointestinal stromal tumors	Designated/Approved	Approved for Orphan Indication	Treatment of patients with locally advanced, unresectable or metastatic gastrointestinal stromal tumor (GIST) who have been previously treated with imatinib mesylate and sunitinib malate.	2013-02-25
433	pomalidomide	Pomalyst	2003-01-15	Treatment of multiple myeloma	Designated/Approved	Approved for Orphan Indication	Treatment of patients with multiple myeloma who have received at least two prior therapies including lenalidomide and bortezomib and have demonstrated disease progression on or within 60 days of completion of the last therapy.	2013-02-08
434	glycerol phenylbutyrate	Ravicti	2009-04-27	Maintenance treatment of patients with deficiencies in enzymes of the urea cycle	Designated/Approved	Approved for Orphan Indication	Use as a nitrogen-binding agent for chronic management of adult and pediatric patients > or =2 years of age with urea cycle disorders (UCDs) who cannot be managed by dietary protein restriction and/or amino acid supplementation alone. RAVICTI must be used with dietary protein restriction and, in some cases, dietary supplements (eg, essential amino acids, arginine, citrulline, protein-free calorie…	2013-02-01
435	mipomersen	Kynamro	2006-05-23	Treatment of homozygous familial hypercholesterolemia	Designated/Approved	Approved for Orphan Indication	Adjunct to lipid-lowering medications and diet to reduce low density lipoprotein-cholesterol (LDL-C), apolipoprotein B (apo B), total cholesterol (TC), and non-high density lipoprotein-cholesterol (non-HDL-C) in patients with homozygous familial hypercholesterolemia (HoFH).	2013-01-29
436	imatinib	Gleevec	2005-10-11	Treatment of Philadelphia-positive acute lymphoblastic leukemia	Designated/Approved	Approved for Orphan Indication	Pediatric patients with newly diagnosed Philadelphia chromosome-positive acute lymphoblastic leukemia (Ph+ ALL) in combination with chemotherapy	2013-01-25
437	factor XIII concentrate (human)	Corifact	1985-01-16	Treatment of congenital factor XIII deficiency	Designated/Approved	Approved for Orphan Indication	Indicated for routine prophylactic treatment and peri-operative management of surgical bleeding in adult and pediatric patients with congenital FXIII deficiency.	2013-01-24
438	deferasirox	Exjade; Jadenu Sprinkles	2015-02-24	Treatment of chronic iron overload in alpha-thalassemia	Designated/Approved	Approved for Orphan Indication	Treatment of chronic iron overload in patients 10 years of age and older with non-transfusion dependent thalassemia (NTDT) syndromes and with a liver iron concentration (LIC) of at least 5 milligrams of iron per gram of liver dry weight (mg Fe/g dw) and serum ferritin greater than 300 mcg/L.	2013-01-23
439	bedaquiline	Sirturo	2005-01-10	Treatment of active tuberculosis	Designated/Approved	Approved for Orphan Indication	Part of combination therapy in adults (greater than or equal to 18 years) with pulmonary multi-drug resistant tuberculosis (MDR-TB).	2012-12-28
440	teduglutide [rDNA origin]	Gattex	2000-06-29	Treatment of short bowel syndrome.	Designated/Approved	Approved for Orphan Indication	Treatment of adult patients with short bowel syndrome (SBS) who are dependent on parenteral support	2012-12-21
441	lomitapide	Juxtapid	2007-10-23	Treatment of homozygous familial hypercholesterolemia	Designated/Approved	Approved for Orphan Indication	Adjunct to a low-fat diet and other lipid-lowering treatments, including LDL apheresis where available, to reduce low-density lipoprotein cholesterol (LDL-C), total cholesterol (TC), apolipoprotein B (apo B), and non-high-density lipoprotein cholesterol (non-HDL-C) in patients with homozygous familial hypercholesterolemia (HoFH).	2012-12-21
442	anakinra	Kineret	2010-08-19	Treatment of cryopyrin-associated periodic syndromes	Designated/Approved	Approved for Orphan Indication	Treatment of neonatal-onset multisystem inflammatory disease (NOMID)	2012-12-21
443	Varicella Zoster Immune Globulin (Human)	Varizig	2006-11-07	Passive immunization for the treatment of exposed, susceptible individuals who are at risk of complications from varicella	Designated/Approved	Approved for Orphan Indication	Post exposure prophylaxis of varicella in high risk individuals to reduce the severity of varicella	2012-12-20
444	raxibacumab	Abthraxtm	2003-11-12	Treatment of anthrax	Designated/Approved	Approved for Orphan Indication	Treatment of inhalation anthrax due to Bacillus anthracis in combination with appropriate antibacterial drugs,	2012-12-14
445	pasireotide	Signifor	2009-07-24	Treatment of Cushing's disease	Designated/Approved	Approved for Orphan Indication	Treatment of adult patients with Cushing's disease for whom pituitary surgery is not an option or has not been curative	2012-12-14
446	ponatinib	Iclusig	2009-11-20	Treatment of chronic myeloid leukemia	Designated/Approved	Approved for Orphan Indication	Treatment of adult patients with chronic phase, accelerated phase, or blast phase chronic myeloid leukemia (CML) that is resistant or intolerant to prior tyrosine kinase inhibitor therapy.	2012-12-14
447	ponatinib	Iclusig	2009-11-20	Treatment of Philadelphia chromosome-positive acute lymphoblastic leukemia (Ph+ALL)	Designated/Approved	Approved for Orphan Indication	Treatment of adult patients with Philadelphia chromosome positive acute lymphoblastic leukemia (Ph+ALL) that is resistant or intolerant to prior tyrosine kinase inhibitor therapy.	2012-12-14
448	cabozantinib	Cometriq	2010-11-29	Treatment of follicular, medullary and anaplastic thyroid carcinoma and metastatic or locally advanced papillary thyroid cancer.	Designated/Approved	Approved for Orphan Indication	Treatment of progressive, metastatic medullary thyroid cancer (MTC).	2012-11-29
449	omacetaxine mepesuccinate	Synribo	2006-03-10	Treatment of chronic myelogenous leukemia	Designated/Approved	Approved for Orphan Indication	Treatment of adult patients with chronic or accelerated phase chronic myeloid leukemia (CML) with resistance and/or intolerance to two or more tyrosine kinase inhibitors (TKI)	2012-10-26
450	Cysteamine hydrochloride	Cystaran	1997-08-19	Treatment of corneal cystine crystal accumulation in cystinosis patients.	Designated/Approved	Approved for Orphan Indication	Treatment of corneal cystine crystal accumulation in patients with cystinosis	2012-10-02
451	bosutinib	Bosulif	2009-02-24	Treatment of chronic myelogenous leukemia	Designated/Approved	Approved for Orphan Indication	Treatment of adult patients with chronic, accelerated or blast phase Philadelphia chromosome-positive (Ph+) chronic myelogenous leukemia (CML) with resistance, or intolerance to prior therapy	2012-09-04
452	Technetium Tc99m sulfur colloid injection, lyophilized	Technetium Tc99m Sulfur Colloi	2009-03-17	For localization of sentinel lymph nodes in patients with melanoma	Designated/Approved	Approved for Orphan Indication	Localization of lymph nodes draining a primary tumor in patients with melanoma when used with a hand-held gamma counter	2012-08-13
453	vinCRIStine sulfate LIPOSOME injection	Marqibo	2007-01-08	Treatment of acute lymphoblastic leukemia	Designated/Approved	Approved for Orphan Indication	Treatment of adult patients with Philadelphia chromosome-negative (Ph-) acute lymphoblastic leukemia (ALL) in second or greater relapse or whose disease has progressed following two or more anti-leukemia therapies.	2012-08-09
454	carfilzomib	Kyprolis	2008-01-18	Treatment of multiple myeloma	Designated/Approved	Approved for Orphan Indication	Treatment of patients with multiple myeloma who have received at least two prior therapies including bortezomib and an immunomodulatory agent and have demonstrated disease progression on or within 60 days of completion of the last therapy.	2012-07-20
455	immune globulin infusion (human)	Gammagard Liquid	2006-07-20	Treatment of multifocal motor neuropathy	Designated/Approved	Approved for Orphan Indication	Maintenance therapy to improve muscle strength and disability in adult patients with Multifocal Motor Neuropathy (MMN).	2012-06-22
456	difluprednate	Durezol	2008-09-30	Treatment of endogenous and traumatic anterior uveitis and panuveitis.	Designated/Approved	Approved for Orphan Indication	Treatment of endogenous anterior uveitis	2012-06-13
457	gabapentin enacarbil	Horizant	2011-06-07	Treatment of postherpetic neuralgia	Designated/Approved	Approved for Orphan Indication	Management of postherpetic neuralgia in adults.	2012-06-06
458	Taliglucerase alfa	Elelyso For Injection	2009-09-03	Treatment of Gaucher's disease	Designated/Approved	Approved for Orphan Indication	Use as long-term enzyme replacement therapy in patients with Type 1 Gaucher disease	2012-05-01
459	everolimus	Afinitor	2009-06-08	Treatment of tuberous sclerosis complex including TSC-associated subependymal giant cell astrocytoma (SEGA), TSC-associated angiomyolipoma and TSC-associated lymphangioleiomyomatosis (LAM)	Designated/Approved	Approved for Orphan Indication	Treatment of adults with renal angiomyolipoma and tuberous sclerosis complex (TSC) not requiring immediate surgery.	2012-04-26
460	pazopanib	Votrient	2009-10-20	Treatment of soft tissue sarcomas	Designated/Approved	Approved for Orphan Indication	Advanced soft tissue sarcoma (STS) who have received prior chemotherapy	2012-04-26
461	mifepristone	Korlym	2007-07-05	Treatment of the clinical manifestations of endogenous Cushing's syndrone	Designated/Approved	Approved for Orphan Indication	for the control of hyperglycemia secondary to hypercortisolism in adult patients with endogenous Cushing's syndrome who have type 2 diabetes mellitus or glucose intolerance and have failed surgery or are not candidates for surgery.	2012-02-17
462	mitomycin-C	Mitosol	2008-01-08	Treatment of refractory glaucoma as an adjunct to surgery	Designated/Approved	Approved for Orphan Indication	An adjunct to ab externo glaucoma surgery.	2012-02-07
463	ivacaftor	Kalydeco	2006-12-20	Treatment of patients with cystic fibrosis	Designated/Approved	Approved for Orphan Indication	Treatment of cystic fibrosis (CF) in patients age 6 years and older who have a G551D mutation in the CFTR gene.	2012-01-31
464	glucarpidase	Voraxaze	2003-08-19	Treatment of patients at risk of methotrexate toxicity	Designated/Approved	Approved for Orphan Indication	Treatment of toxic (>1 micromole/liter) plasma methotrexate concentrations in patients with delayed methotrexate clearance due to impaired renal function.	2012-01-17
465	Erwinia L-asparaginase	Erwinase	1986-07-30	Treatment of acute lymphocytic leukemia.	Designated/Approved	Approved for Orphan Indication	Treatment of patients with acute lymphoblastic leukemia (ALL) who have developed hypersensitivity to E. coli-derived asparaginase.	2011-11-18
466	ruxolitinib phosphate	Jakafi	2008-09-05	Treatment of myelofibrosis	Designated/Approved	Approved for Orphan Indication	Treatment of patients with intermediate or high-risk myelofibrosis, including primary myelofibrosis, post-polycythemia vera myelofibrosis and post-essential thrombocythemia myelofibrosis	2011-11-16
467	clobazam	Onfi	2007-12-18	Treatment of Lennox-Gastaut Syndrome	Designated/Approved	Approved for Orphan Indication	Adjunctive treatment of seizures associated with Lennox-Gastaut Syndrome inpatients 2 years of age or older	2011-10-21
468	deferiprone	Ferriprox	2001-12-12	Treatment of iron overload in patients with hematologic disorders requiring chronic transfusion therapy	Designated/Approved	Approved for Orphan Indication	Treatment of patients with transfusional iron overload due to thalassemia syndromes when current chelation therapy is inadequate	2011-10-14
469	infliximab	Remicade	2003-11-12	Treatment of pediatric (0 to 16 years of age) ulcerative colitis	Designated/Approved	Approved for Orphan Indication	For reducing signs and symptoms and inducing and maintaining clinical remission in pediatric patients 6 years of age and older with moderately to severely active ulcerative colitis who have had an inadequate response to conventional therapy	2011-09-23
470	eculizumab	Soliris	2009-04-29	Treatment of atypical hemolytic uremic syndrome	Designated/Approved	Approved for Orphan Indication	For the treatment of atypical Hemolytic Uremic Syndrome (aHUS)	2011-09-23
471	crizotinib	Xalkori	2010-09-13	Treatment of ALK-positive, MET-positive, or ROS-positive non-small cell lung cancer	Designated/Approved	Approved for Orphan Indication	Treatment of patients with locally advanced or metastatic non-small cell lungcancer (NSCLC) that is anaplastic lymphoma kinase (ALK)-positive as detected by an FDAapprovedtest	2011-08-26
472	icatibant	Firazyr	2003-11-25	Treatment of angioedema	Designated/Approved	Approved for Orphan Indication	Treatment of acute attacks of hereditary angioedema in adults 18 years of age and older	2011-08-25
473	brentuximab vedotin	Adcetris	2007-01-30	Treatment of Hodgkin's lymphoma	Designated/Approved	Approved for Orphan Indication	The treatment of patients with Hodgkin lymphoma after failure of autologous stem cell transplant (ASCT) or after failure of at least two prior multi-agent chemotherapy regimens in patients who are not ASCT candidates	2011-08-19
474	brentuximab vedotin	Adcetris	2008-10-23	Treatment of peripheral T-cell lymphoma, including anaplastic large cell lymphoma, peripheral T-cell lymphoma not otherwise specified, angioimmunoblastic T-cell lymphoma, adult T-cell leukemia/lymphoma, enteropathy-associated T-cell lymphoma, and extranodal NK/T-cell lymphoma.	Designated/Approved	Approved for Orphan Indication	The treatment of patients with systemic anaplastic large cell lymphoma (sALCL) after failure of at least one prior multi-agent chemotherapy regimen	2011-08-19
475	vemurafenib	Zelboraf	2010-12-20	Treatment of patients with IIb to Stage IV melanoma positive for the BRAF(v600) mutation	Designated/Approved	Approved for Orphan Indication	Treatment of unresectable or metastatic melanoma with the BRAFV600E mutation as detected by an FDA-approved test.	2011-08-17
476	Centruroides immune F(ab)2	Anascorp	2000-06-12	Treatment of scorpion envenomations requiring medical attention.	Designated/Approved	Approved for Orphan Indication	Treatment of clinical signs of scorpion envenomation	2011-08-04
477	coccidioidin SD Skin Test Antigen	n/a	2007-12-19	For the diagnosis of Coccidioidomycosis	Designated/Approved	Approved for Orphan Indication	For the detection of delayed type hypersensitivity to C. immitis in individuals, 18-64 years of age, with a history of pulmonary coccidioidomy-cosis	2011-07-29
478	romidepsin	Istodax	2004-09-30	Treatment of non-Hodgkin T-cell lymphomas	Designated/Approved	Approved for Orphan Indication	Treatment of peripheral T-cell lymphoma (PTCL) in patients who have received at least one prior therapy	2011-06-16
479	belatacept	Nulojix	2008-02-20	Prophylaxis of organ rejection in renal allograft recipients	Designated/Approved	Approved for Orphan Indication	Prophylaxis of organ rejection in adult patients receiving kidney transplants	2011-06-15
480	everolimus	Afinitor	2008-02-14	Treatment of neuroendocrine tumors	Designated/Approved	Approved for Orphan Indication	Treatment of progressive neuroendocrine tumors of pancreatic origin (PNET) in patients with unresectable, locally advanced or metastatic disease	2011-05-05
481	levoleucovorin	Fusilev	1990-12-18	For use in combination chemotherapy with the approved agent 5-fluorouracil in the palliative treatment of metastatic adenocarcinoma of the colon and rectum	Designated/Approved	Approved for Orphan Indication	For use in combination chemotherapy with 5-fluorouracil in the palliative treatment of patients with advanced metastatic colorectal cancer	2011-04-29
482	rituximab	Rituxan	2006-02-14	Treatment of patients with anti-neutrophil cytoplasmic antibody-associated vasculitis (Wegener's Granulomatosis, Microscopic Polyangiitis, and Churg-Strauss Syndrome)	Designated/Approved	Approved for Orphan Indication	For the use of Rituxan (rituximab) in combination with glucocorticoids for the treatment of patients with Wegener's Granulomatosis (WG) and Microscopic Polyangiitis (MPA). )	2011-04-19
483	vandetanib	Caprelsa(R)	2005-10-21	Treatment of patients with follicular thyroid carcinoma, medullary thyroid carcinoma, anaplastic thyroid carcinoma, and locally advanced and metastatic papillary thyroid carcinoma	Designated/Approved	Approved for Orphan Indication	Treatment of asymptomatic or progressive medullary thyroid cancer in patients with unresectable locally advanced or metastatic disease	2011-04-06
484	peginterferon alfa-2b	Sylatron	2008-04-09	Treatment of malignant melanoma stages IIb through IV.	Designated/Approved	Approved for Orphan Indication	Adjuvant treatment of melanoma with microscopic or gross nodal involvement within 84 days of definitive surgical resection including complete lymphadenectomy	2011-03-29
485	ipilimumab	Yervoy	2004-06-03	Treatment of high risk Stage II, Stage III, and Stage IV melanoma	Designated/Approved	Approved for Orphan Indication	Treatment of unresectable or metastatic melanoma	2011-03-25
486	cinacalcet	Sensipar	2010-04-30	Treatment of hypercalcemia in patients with primary hyperparathyroidism for whom parathyroidectomy would be indicated on the basis of serum calcium levels, but who are unable to undergo surgery	Designated/Approved	Approved for Orphan Indication	Treatment of severe hypercalcemia in patients with primary hyperparathyroidism who are unable to undergo parathyroidectomy	2011-02-25
487	factor XIII concentrate (human)	Corifact	1985-01-16	Treatment of congenital factor XIII deficiency	Designated/Approved	Approved for Orphan Indication	For the routine prophylactic treatment of congenital factor XIII deficiency	2011-02-17
488	hydroxyprogesterone caproate	Makena	2007-01-25	Prevention of preterm birth in singleton pregnancies	Designated/Approved	Approved for Orphan Indication	To reduce the risk of preterm birth in women with singleton pregnancy who have a history of singleton spontaneous preterm birth	2011-02-03
489	gabapentin	Gralise	2010-11-08	Management of postherpetic neuralgia	Designated/Approved	Approved for Orphan Indication	For the management of postherpetic neuralgia	2011-01-28
490	sodium nitrite and sodium thiosulfate	Nithiodote	2008-04-09	Treatment of known or suspected cyanide poisoning	Designated/Approved	Approved for Orphan Indication	For sequential use for the treatment of cyanide poisoning that is judged to be life-threatening	2011-01-14
491	everolimus	Afinitor	2009-06-08	Treatment of tuberous sclerosis complex including TSC-associated subependymal giant cell astrocytoma (SEGA), TSC-associated angiomyolipoma and TSC-associated lymphangioleiomyomatosis (LAM)	Designated/Approved	Approved for Orphan Indication	Treatment of patients with subependymal giant cell astrocytoma (SEGA) associated with tuberous sclerosis who require therapeutic intervention but are not candidates for curative surgical resection	2010-10-29
492	trastuzumab	Herceptin	2009-10-13	Treatment of HER2-overexpressing advanced adenocarcinoma of the stomach, including gastroesophageal junction	Designated/Approved	Approved for Orphan Indication	Treatment of patients with HER2 overexpressing metastatic gastric or gastroesophageal junction adenocarcinoma, who have not received prior treatment for metastatic disease	2010-10-20
493	repository corticotropin or adrenocorticotropic hormone	H.P. Acthar Gel	2003-05-21	Treatment of infantile spasms	Designated/Approved	Approved for Orphan Indication	To treat infantile spasms	2010-10-15
494	dexamethasone intravitreal implant	Ozurdex	1998-09-11	Treatment of non-infectious ocular inflammation of the posterior segment in patients with intermediate, posterior, and panuveitis	Designated/Approved	Approved for Orphan Indication	For treatment of non-infectious uveitis affecting the posterior segment of the eye	2010-09-24
495	pegloticase	Krystexxa	2001-02-21	To control the clinical consequences of hyperuricemia in patients with severe gout in whom conventional therapy is contraindicated or has been ineffective.	Designated/Approved	Approved for Orphan Indication	Treatment of chronic gout in adult patients refractory to conventional treatment	2010-09-14
496	glycopyrrolate	Cuvposa	2006-06-09	Treatment of pathologic (chronic moderate to severe) drooling in pediatric patients	Designated/Approved	Approved for Orphan Indication	To reduce chronic drooling in patients aged 3 - 16 with neurologic conditions associated with problem drooling (e.g. cerebral palsy)	2010-07-28
497	Recombinant human acid alpha-glucosidase; alglucosidase alfa	1. Myozyme 2. Lumizyme	1997-08-19	Treatment of glycogen storage disease type II.	Designated/Approved	Approved for Orphan Indication	Lumizyme for patients 8 years and older with late (non-infantile) onset Pompe disease (GAA deficiency) who do not have evidence of cardiac hypertrophy. The safety and efficacy of Lumizyme (alglucosidase alfa) have not been evaluated in controlled clinical trials in infantile-onset patients, or in late (non-infantile) onset patients less than 8 years of age	2010-05-24
498	rifaximin	Normix	1998-02-10	Treatment of hepatic encephalopathy	Designated/Approved	Approved for Orphan Indication	Reduction in the risk of overt hepatic encephalopathy (HE) recurrence in patients greater than or equal to 18 years of age	2010-03-24
499	tenofovir	Viread	2009-03-17	Treatment of pediatric HIV infection.	Designated/Approved	Approved for Orphan Indication	Treatment of HIV infection in combination with other antiretroviral agents in patients 12 to less than 18 years of age	2010-03-24
500	carglumic acid	Carbaglu	1998-01-20	Treatment of N-acetylglutamate synthetase deficiency.	Designated/Approved	Approved for Orphan Indication	As an adjunctive therapy for the treatment of acute hyperammonemia due to the deficiency of the hepatic enzyme N-acetylglutamate synthase (NAGS) and as manitenance therapy for chronic hyperammonemia due to NAGS deficiency	2010-03-18
501	velaglucerase-alfa	Vpriv	2009-06-08	Treatment of Gaucher disease	Designated/Approved	Approved for Orphan Indication	Treatment of Type I Gaucher Disease	2010-02-26
502	aztreonam	Cayston	2002-03-12	Inhalation therapy for control of gram-negative bacteria in the respiratory tract of patients with cystic fibrosis	Designated/Approved	Approved for Orphan Indication	To improve respiratory symptoms in cystic fibrosis (CF) patients with Pseudomonas aeruginosa	2010-02-22
503	rituximab	Rituxan	2004-01-29	Treatment of chronic lymphocytic leukemia	Designated/Approved	Approved for Orphan Indication	Treatment of patients previously untreated for CD20-positive chronic lymphocytic leukemia in combination wih fludarbine and cyclophosphamide	2010-02-18
504	collagenase clostridium histolyticum	Xiaflex	1996-05-23	Treatment of advanced (involutional or residual stage) Dupuytren's disease	Designated/Approved	Approved for Orphan Indication	Treatment of adult patients with Dupuytren's contracture with a palpable cord	2010-02-02
505	dalfampridine	Ampyra	1987-06-02	Relief of symptoms of multiple sclerosis	Designated/Approved	Approved for Orphan Indication	Treatment to improve walking in patients with multiple sclerosis	2010-01-22
506	Human plasma coagulation Factor VIII and human plasma von Willebrand Factor	Wilate	2007-04-18	Treatment of von Willebrand disease except for surgical and/or invasive procedures in patients with von Willebrand disease in whom desmopressin is either ineffective or contraindicated	Designated/Approved	Approved for Orphan Indication	Treatment of spontaneous or trauma-induced bleeding episodes in patients with severe von Willebrand disease (VWD) as well as patients with mild or moderate VWD in whom the use of desmopressin is known or suspected to be ineffective or contraindicated	2009-12-04
507	ecallantide	Kalbitor	2003-02-04	Treatment of angioedema	Designated/Approved	Approved for Orphan Indication	Treatment of acute attacks of hereditary angioedema in patients 16 years of age and older	2009-12-01
508	capsaicin	Qutenza	2009-05-22	Management of neuropathic pain in patients with postherpetic neuralgia	Designated/Approved	Approved for Orphan Indication	Management of neuropathic pain associated with postherpetic neuralgia	2009-11-16
509	romidepsin	Istodax	2004-09-30	Treatment of non-Hodgkin T-cell lymphomas	Designated/Approved	Approved for Orphan Indication	Treatment of cutaneous T-cell lymphoma (CTCL) in patients who have received at least one prior systemic therapy	2009-11-05
510	ofatumumab	Arzerra	2009-03-10	Treatment of chronic lymphocytic leukemia	Designated/Approved	Approved for Orphan Indication	Treatment of chronic lymphocytic leukemia (CLL) refractory to alemtuzumab and fludarabine	2009-10-26
511	C1-esterase-inhibitor, human, pasteurized	Haegarda	1992-10-16	Prevention and/or treatment of acute attacks of hereditary angioedema.	Designated/Approved	Approved for Orphan Indication	Treatment of acute attacks of hereditary angioedema.	2009-10-08
512	pralatrexate	Folotyn	2006-07-20	Treatment of T-cell lymphoma	Designated/Approved	Approved for Orphan Indication	Treatment of patients with relapsed or refractory peripheral T-cell lymphoma	2009-09-24
513	ganciclovir	Zirgan	2007-03-22	Treatment of acute herpetic keratitis (dendritic and geographic ulcers)	Designated/Approved	Approved for Orphan Indication	Treatment of acute herpetic keratitis (dendritic ulcers)	2009-09-15
514	vigabatrin	Sabril	2000-06-12	Treatment of infantile spasms.	Designated/Approved	Approved for Orphan Indication	For infantile spasms (IS) - 1 month to 2 years of age.	2009-08-21
515	bevacizumab	Avastin	2003-11-06	Treatment of renal cell carcinoma	Designated/Approved	Approved for Orphan Indication	Treatment of renal cell carcinoma in combination with interferon alfa	2009-07-31
516	treprostinil (inhalational)	Tyvaso	2010-06-17	Treatment of pulmonary arterial hypertension	Designated/Approved	Approved for Orphan Indication	Treatment of pulmonary arterial hypertension (WHO Group I) in patients with NYHA Class III symptoms, to increase walk distance	2009-07-30
517	colchicine	Colcrys	2007-09-25	Treatment of familial Mediterranean fever	Designated/Approved	Approved for Orphan Indication	Treatment of familial Mediterranean fever	2009-07-29
518	sotalol (IV)	So-Aqueous	2008-07-25	For ventricular tachycardia, ventricular fibrillation, or the maintenance of sinus rhythm in patients converted from atrial fibrillation or atrial flutter when oral administration is not possible.	Designated/Approved	Approved for Orphan Indication	For use as a substitute for oral sotalol in patients who are unable to take sotalol orally [oral sotalol is indicated for maintenance of normal sinus rhythm in patients with history of highly symptomatic atrial fibrillation /flutter, and for treatment of documented life-threatening ventricular arrhythmias]	2009-07-02
519	canakinumab	Ilaris	2007-12-18	Treatment of cryopyrin-associated periodic syndromes	Designated/Approved	Approved for Orphan Indication	Treatment of cryopyrin-associated periodic syndromes (CAPS), in adults and children 4 years of age and older.	2009-06-17
520	tadalafil	Adcirca	2006-12-18	Treatment of pulmonary arterial hypertension	Designated/Approved	Approved for Orphan Indication	Treatment of pulmonary arterial hypertension (WHO Group I) to improve exercise ability	2009-05-22
521	bevacizumab	Avastin	2006-05-26	Treatment of malignant glioma	Designated/Approved	Approved for Orphan Indication	Treatment of glioblastoma with progressive disease following prior therapy	2009-05-05
522	artemether/lumefantrine	Coartem	2007-08-31	For the treatment of infections due to Plasmodium falciparum or mixed infections including P. falciparum.	Designated/Approved	Approved for Orphan Indication	Treatment of malaria in patients of 5 kg bodyweight or above with acute, uncomplicated malaria due to Plasmodium falciparum or mixed infections including P. falciparum	2009-04-07
523	Trypan blue	Membraneblue	2006-08-02	Selectively staining epiretinal membranes during ophthalmic surgical vitrectomy procedures	Designated/Approved	Approved for Orphan Indication	For use as an aid in ophthalmic surgery by staining the epiretinal membranes during ophthalmic surgical vitrectomy procedures, facilitating removal of the tissue	2009-02-20
524	recombinant human antithrombin	Atryn	2007-12-07	Treatment of congenital antithrombin deficiency to prevent the occurrence of serious, potentially life-threatening venous thromboembolisms which may develop as a result of surgical or obstetrical procedures	Designated/Approved	Approved for Orphan Indication	Prevention of peri-operative and peri-partum thromboembolic events, in hereditary antithrombin deficient patients.	2009-02-06
525	human fibrinogen concentrate, pasteurized	Riastap	2008-03-13	Treatment of fibrinogen deficient patients.	Designated/Approved	Approved for Orphan Indication	Treatment of acute bleeding episodes in patients with congenital fibrinogen deficiency (afibrinogenemia and hypofibrinogenemia)	2009-01-16
526	imatinib mesylate	Gleevec	2001-11-01	Treatment of gastrointestinal stromal tumors	Designated/Approved	Approved for Orphan Indication	Adjuvant treatment of adult patients following complete resection Kit (CD 117) positive gastrointestinal stromal tumors (GIST).	2008-12-19
527	Fludarabine phosphate oral tablets	n/a	2007-12-18	Treatment of B-cell chronic lymphocytic leukemia	Designated/Approved	Approved for Orphan Indication	Treatment of adult patients with B-cell chronic lymphocytic leukemia (CLL) whose disease has not responded to or has progressed during or after treatment with at least one standard alkylating-agent containing regimen	2008-12-18
528	plerixafor	Mozobil (R)	2003-07-10	For use to improve the yield of progentor cells in the apheresis product for subsequest stem cell transplantation following myelosuppressive or myeloablative chemotherapy	Designated/Approved	Approved for Orphan Indication	To enhance mobilization of hematopoietic stem cells to the peripheral blood for collection and subsequent autologous transplantation in patients with lymphoma and multiple myeloma	2008-12-15
529	eltrombopag	Promacta	2008-05-05	Treatment of idiopathic thrombocytopenia purpura	Designated/Approved	Approved for Orphan Indication	Treatment of thrombocytopenia in patients with chronic immune (idiopathic) thrombocytopenic purpura who have had an insufficient response to corticosteroids, immunoglobulins, or splenectomy	2008-11-20
530	rufinamide	Banzel	2004-10-08	Treatment of Lennox-Gastaut Syndrome.	Designated/Approved	Approved for Orphan Indication	Adjunctive therapy of seizures associated with Lennox-Gastaut syndrome.	2008-11-14
531	bendamustine hydrochloride	Treanda	2013-11-26	Treatment of Follicular Lymphoma, Small Lymphocytic Lymphoma, Lymphoplasmacytic Lymphoma, Splenic Marginal Zone Lymphoma, Extranodal Marginal Zone B-cell Lymphoma of Mucosa-Associated Lymphoma Tissue (MALT), and Nodal Marginal Zone Lymphoma (Collectively Indolent B-cell Non-Hodgkin's Lymphoma)	Designated/Approved	Approved for Orphan Indication	Treatment of Indolent B-cell non-Hodgkin lymphoma (NHL) that has progressed during or within six months of treatment with rituximab or a rituximab-containing regimen.	2008-10-31
532	C1 esterase inhibitor (human)	Cinryze(R)	2004-07-16	Treatment of angioedema	Designated/Approved	Approved for Orphan Indication	Routine prophylaxis against angioedema attacks in patients with Hereditary Angioedema (HAE)	2008-10-10
533	Iobenguane I 123	Adreview	2006-12-01	For the diagnosis of neuroblastomas	Designated/Approved	Approved for Orphan Indication	To be used in the detection of primary or metastatic pheochromocytomas or neuroblastomas as an adjunct to other diagnostic tests	2008-09-19
534	Iobenguane I 123	Adreview	2006-12-01	For the diagnosis of pheochromocytomas	Designated/Approved	Approved for Orphan Indication	To be used in the detection of primary or metastatic pheochromocytomas or neuroblastomas as an adjunct to other diagnostic tests	2008-09-19
535	Immune Globulin (Human)	Gamunex-C	2004-07-27	Treatment of chronic inflammatory demyelinating polyneuropathy	Designated/Approved	Approved for Orphan Indication	Treatment of Chronic Inflammatory Demyelinating Polyneuropathy (CIDP) to improve neuromuscular disability and impairment and for maintenance therapy to prevent relapse	2008-09-12
536	romiplostim	Nplate	2003-03-27	Treatment of immune thrombocytopenic purpura	Designated/Approved	Approved for Orphan Indication	Treatment of thrombocytopenia in patients with chronic immune (idiopathic) thrombocytopenic purpura (ITP) who have had an insufficient response to corticosteroids, immunoglobulins, or splenectomy	2008-08-22
537	Tetrabenazine	Xenazine	1997-12-11	Treatment of Huntington's disease	Designated/Approved	Approved for Orphan Indication	Treatment of chorea associated with Huntington's disease	2008-08-15
538	bortezomib	Velcade	2003-01-15	Treatment of multiple myeloma	Designated/Approved	Approved for Orphan Indication	First-line therapy of multiple myeloma.	2008-06-20
539	Bendamustine hydrochloride	Treanda	2007-08-17	Treatment of chronic lymphocytic leukemia	Designated/Approved	Approved for Orphan Indication	Treatment of patients with chronic lymphocytic leukemia	2008-03-20
540	Levoleucovorin	Fusilev	1991-08-01	For use in conjunction with high-dose methotrexate in the treatment of osteosarcoma.	Designated/Approved	Approved for Orphan Indication	Levoleucovorin rescue is indicated after high-dose methotrexate therapy in osteosarcoma. Levoleucovorin is also indicated to diminish the toxicity and counteract the effects of impaired methotrexate elimination and of inadvertent overdosage of folic acid antagonists	2008-03-07
541	Rilonacept	Arcalyst	2004-12-20	Treatment of CIAS1-Associated Periodic Syndromes	Designated/Approved	Approved for Orphan Indication	Treatment of Cryopyrin-Assisted Periodic Syndromes (CAPS)	2008-02-27
542	adalimumab	Humira	2005-03-21	Treatment of juvenile rheumatoid arthritis	Designated/Approved	Approved for Orphan Indication	Reducing signs and symptoms of moderately to severely active polyarticular juvenile idiopathic arthritis in patients 4 years of age and older.	2008-02-21
543	Thyrotropin alfa	Thyrogen	2001-08-03	Treatment of well-differentiated papillary, follicular or combined papillary/follicular carcinomas of the thyroid	Designated/Approved	Approved for Orphan Indication	For use as an adjunctive treatment for radioiodine ablation of thyroid tissue remnants in patients who have undergone thyroidectomy for well-differentiated thyroid cancer and who do not have evidence of metastatic thyroid cancer	2007-12-14
544	sapropterin	Kuvan	2004-01-29	Treatment of hyperphenylalaninemia	Designated/Approved	Approved for Orphan Indication	Indicated to reduce blood phenylalanine (Phe) levels in patients with hyperphenylalaninemia (HPA) due to tetrahydrobiopterin- (BH4-) responsive Phenylketonuria (PKU). Kuvan is to be used in conjunction with a Phe-restricted diet.	2007-12-13
545	Sorafenib	Nexavar	2006-04-20	Treatment of hepatocellular carcinoma	Designated/Approved	Approved for Orphan Indication	Treatment of unresectable hepatocellular carcinoma	2007-11-16
546	nilotinib	Tasigna	2006-04-27	Treatment of chronic myelogenous leukemia	Designated/Approved	Approved for Orphan Indication	For the use for chronic phase (CP) and accelerated phase (AP) Philadelphia chromosome positive chronic myelogenous leukemia (CML) in adult patients resistant to or intolerant to prior therapy that included imatinib.	2007-10-29
547	raloxifene	Evista	2005-07-14	Reduction of the risk of breast cancer in postmenopausal women	Designated/Approved	Approved for Orphan Indication	Reduction in risk of invasive breast cancer in postmenopausal women with osteoporosis and reduction in risk of invasive breast cancer in postmenopausal women at high risk for invasive breast cancer	2007-09-13
548	dexrazoxane	Totect(R)	2004-03-25	Treatment of anthracycline extravasation during chemotherapy	Designated/Approved	Approved for Orphan Indication	Treatment of extravasation resulting from IV anthracycline chemotherapy	2007-09-06
549	Lanreotide	Somatuline Depot	2000-09-11	Treatment for acromegly	Designated/Approved	Approved for Orphan Indication	Long-term treatment of acromegalic patients who have had an inadequate response to or cannot be treated with surgery and/or radiotherapy	2007-08-30
550	ambrisentan	Letairis	2004-07-16	Treatment of pulmonary arterial hypertension	Designated/Approved	Approved for Orphan Indication	Treatment of pulmonary arterial hypertension (WHO group I) in patients with WHO class II or III symptoms to improve exercise capacity and delay clinical worsening	2007-06-15
551	Somatropin	Norditropin	2006-08-09	Treatment of short stature in patients with Noonan syndrome	Designated/Approved	Approved for Orphan Indication	Treatment of short stature in patients with Noonan syndrome	2007-05-31
552	Temsirolimus	Torisel	2004-12-16	Treatment of renal cell carcinoma	Designated/Approved	Approved for Orphan Indication	Treatment of advanced renal cell carcinoma	2007-05-30
553	doxorubicin HCL liposome injection	Doxil	2004-12-29	Treatment of multiple myeloma	Designated/Approved	Approved for Orphan Indication	For use in combination with bortezomib for the treatment of patients with multiple myeloma who have not previously received bortezomib and have at least one prior therapy.	2007-05-17
554	Histrelin	Supprelin La	2005-11-18	Treatment of central precocious puberty	Designated/Approved	Approved for Orphan Indication	Treatment of central precocious puberty	2007-05-03
555	hepatitis B immune globulin (human)	Hepagam B	2008-03-24	Prevention of hepatitis B recurrence following orthotopic liver transplant	Designated/Approved	Approved for Orphan Indication	Prevention of hepatitis B recurrence following liver transplantation in HBsAG-positive liver transplant patients	2007-04-06
556	Protein C concentrate	Ceprotin	1992-06-23	For replacement therapy in congenital protein C deficiency for the prevention and treatment of thrombosis, pulmonary emboli, and purpura fulminans.	Designated/Approved	Approved for Orphan Indication	Prevention and treatment of venous thrombosis and purpura fulminans	2007-03-30
557	eculizumab	Soliris	2003-08-20	Treatment of paroxysmal nocturnal hemoglobinuria	Designated/Approved	Approved for Orphan Indication	Treatment of paroxysmal nocturnal hemoglobinuria to reduce hemolysis	2007-03-16
558	Antihemophilic factor (human)	Alphanate	1996-01-05	Treatment of von Willebrand's disease	Designated/Approved	Approved for Orphan Indication	For surgical and/or invasive procedures in patients with von Willebrand Disease (VWD) in whom desmopressin is either ineffective or contraindicated. It is not indicated for patients with severe VWD (Type 3) undergoing major surgery	2007-01-31
559	Balsalazide disodium	Colazal	2005-08-12	Treatment of pediatric patients with ulcerative colitis	Designated/Approved	Approved for Orphan Indication	Treatment of mildly to moderately active ulcerative colitis in patients 5 years of age and older. Safety and Effectiveness of Colazal beyond 8 weeks in children (ages 5-17) and 12 weeks in adults have not been established.	2006-12-20
560	Hydroxocobalamin	Cyanokit	2003-11-25	Treatment of acute cyanide poisoning	Designated/Approved	Approved for Orphan Indication	Treatment on known or suspected cyanide poisoning	2006-12-15
561	bortezomib	Velcade	2012-05-30	Treatment of mantle cell lymphoma.	Designated/Approved	Approved for Orphan Indication	Treatment of patients with mantle cell lymphoma who have received at least 1 prior therapy.	2006-12-08
562	Somatropin	Humatrope	2005-12-15	Treatment of short stature in pediatric patients with short stature homeobox-containing gene (SHOX) deficiency	Designated/Approved	Approved for Orphan Indication	Treatment of short stature or growth failure in children with SHOX (short stature homeobox-containing gene) deficiency whose epiphyses are not closed	2006-11-01
563	imatinib mesylate	Gleevec	2005-12-19	Treatment of dermatofibrosarcoma protuberans	Designated/Approved	Approved for Orphan Indication	Treatment of adult patients with unresectable, recurrent and/or metastatic dermatofibrosarcoma protuberans (DFSP)	2006-10-19
564	imatinib	Gleevec	2005-10-11	Treatment of Philadelphia-positive acute lymphoblastic leukemia	Designated/Approved	Approved for Orphan Indication	Treatment of adult patients with relapsed or refractory Philadelphia chromosome positive acute lymphoblastic leukemia (Ph+ALL)	2006-10-19
565	Imatinib mesylate	Gleevec	2005-08-25	Treatment of idiopathic hypereosinophilic syndrome including acute and chronic eosinophilic leukemia	Designated/Approved	Approved for Orphan Indication	Treatment of adult patients with hypereosinophic syndrome (HES) and/or chronic eosinophilic leukemia (CEL) who have the FIP1L1-PDGFRÃ¿}Ã¿Â± fusion kinase (mutational analysis or FISH demonstration of CHIC2 allele deletion) and for patients with HES and/or CEL who are FIP1L1-PDGFRÃ¿}Ã¿Â± fusion kinase negative or unknown	2006-10-19
566	Imatinib mesylate	Gleevec	2005-10-05	Treatment of myeloproliferative disorders/myelodysplastic syndromes associated with platelet-derived growth factor gene re-arrangements	Designated/Approved	Approved for Orphan Indication	Treatment of adult patients with myelodysplastic/myeloproliferative diseases (MDS/MPD) associated with PDGFR (platelet-derived growth factor receptor) gene re-arrangements	2006-10-19
567	Imatinib mesylate	Gleevec	2005-09-09	Treatment of systemic mastocytosis without the D816V c-kit mutation	Designated/Approved	Approved for Orphan Indication	Treatment of adult patients with aggressive mastocytosis (ASM) without the D816V c-Kit mutation or with c-Kit mutational status unknown	2006-10-19
568	Coagulation Factor VIIa (Recombinant)	Novoseven	2004-07-16	Treatment of bleeding episodes in patients with acquired inhibitors to Factor VIII or Factor IX	Designated/Approved	Approved for Orphan Indication	Treatment of bleeding episodes in surgical interventions or invasive procedures in patients with acquired hemophilia	2006-10-13
569	Coagulation factor VIIa (recombinant)	Novoseven	2004-07-21	Prevention of bleeding episodes in patients with acquired inhibitors to Factor VIII or Factor IX	Designated/Approved	Approved for Orphan Indication	Prevention of bleeding in surgical interventions or invasive procedures in patients with acquired hemophilia	2006-10-13
570	vorinostat	Zolinza	2004-03-16	Treatment of T-cell non-Hodgkin's lymphoma	Designated/Approved	Approved for Orphan Indication	Treatment of cutaneous manifestations in patients with cutaneous T-cell lymphoma (CTCL) who have progressive, persistant or recurrent disease on or following two systemic therapies.	2006-10-06
571	bicarbonate infusate	Normocarb Hf	2005-08-09	Use in the management of patients undergoing continuous renal replacement therapy with hemofiltration	Designated/Approved	Approved for Orphan Indication	Use as a replacement solution in Continuous Renal Replacement Therapy (CRRT) to replace water and to correct electrolytes and acid-base imbalances in adults and children	2006-07-26
572	idursulfase	Elaprase	2001-11-28	Long term enzyme replacement therapy for patients with mucopolysaccharidosis II (Hunter Syndrome)	Designated/Approved	Approved for Orphan Indication	Indicated for patients with Hunter syndrome (mucopolysaccharidosis II, MPS II). Idursulfase has been shown to improve walking capacity in these patients	2006-07-24
573	lenalidomide	Revlimid	2001-09-20	Treatment of multiple myeloma	Designated/Approved	Approved for Orphan Indication	For use in combination with dexamethasone for the treatment of multiple myeloma patients who have received at least one prior therapy	2006-06-29
574	dasatinib	Sprycel	2005-11-28	Treatment of chronic myelogenous leukemia	Designated/Approved	Approved for Orphan Indication	Treatment of adults with chronic myeloid leukemia with resistance or intolerance to prior therapy including imatinib	2006-06-28
575	Dasatinib	Sprycel	2005-11-18	Treatment of Philadelphia-positive acute lymphoblastic leukemia	Designated/Approved	Approved for Orphan Indication	Treatment of adults with Philadelphia chromosome-positive acute lymphoblastic leukemia with resistance or intolerance to prior therapy	2006-06-28
576	Thalidomide	Thalomid	1998-10-14	Treatment of multiple myeloma	Designated/Approved	Approved for Orphan Indication	Treatment of patients with newly diagnosed multiple myeloma	2006-05-25
577	Infliximab	Remicade	2003-11-12	Treatment of pediatric (0 to 16 years of age) Crohn's Disease	Designated/Approved	Approved for Orphan Indication	For reducing signs and symptoms and inducing and maintaining clinical remission in pediatric patients with moderately to severely active Crohn's disease who have had an inadequate response to conventional therapy	2006-05-19
578	decitabine	Dacogen	1999-03-08	Treatment of myelodysplastic syndromes.	Designated/Approved	Approved for Orphan Indication	for treatment of patients with myelodysplastic syndromes (MDS) including previously treated and untreated, de novo and secondary MDS of all French-American-British subtypes (refractory anemia, refractory anemia with ringed sideroblasts, refractory anemia with excess blasts, refractory anemia with excess blasts in transformation, and chronic myelomonocytic leukemia) and intermediate-1, intermediat…	2006-05-02
579	Recombinant human acid alpha-glucosidase; alglucosidase alfa	1. Myozyme 2. Lumizyme	1997-08-19	Treatment of glycogen storage disease type II.	Designated/Approved	Approved for Orphan Indication	Myozyme for use in patients with Pompe disease (GAA deficiency). Alglucosidase alfa has been shown to improve ventilator-free survival in patients with infantile onset Pompe disease as compared to an untreated historical control, whereas use of Alphaglucosidase in patients with other forms of Pompe disease has not been adequately studied to assure safety and efficacy.	2006-04-28
580	Ibuprofen lysine	Neoprofen	1996-10-29	Treatment of patent ductus arteriosus	Designated/Approved	Approved for Orphan Indication	For closure of a clinically significant patent ductus arteriosus in premature infants weighing between 500 and 1500 g, who are no more than 32 weeks gestational age when usual medical management (e.g., fluid restriction, diuretics, respiratory support, etc.) is ineffective	2006-04-13
581	Tacrolimus	Prograf	2005-06-06	Prophylaxis of organ rejection in patients receiving heart transplants.	Designated/Approved	Approved for Orphan Indication	Prophylaxis of organ rejection in patients receiving allogenic heart transplants.	2006-03-29
582	cetuximab	Erbitux	2000-07-03	Treatment of squamous cell cancer of the head and neck in patients who express epidermal growth factor receptor	Designated/Approved	Approved for Orphan Indication	For use in combination with radiation therapy, for the treatment of locally or regionally advanced squamous cell carcinoma of the head and neck (SCCHN) and for use as a single agent for the treatment of patients with recurrent or metastatic SCCHN for whom prior platinum-based therapy has failed	2006-03-01
583	lenalidomide	Revlimid	2004-01-29	Treatment of myelodysplastic syndromes	Designated/Approved	Approved for Orphan Indication	Treatment of patients with transfusion dependant anemia due to low or intermediate-1 risk myelodysplastic syndromes associated with a deletion 5 q cytogenetic abnormality with or without additional cytogenetic abnormalities	2005-12-27
584	Sorafenib	Nexavar	2004-10-08	Treatment of renal cell carcinoma.	Designated/Approved	Approved for Orphan Indication	Treatment of patients with advanced renal cell carcinoma	2005-12-20
585	mecasermin rinfabate	Iplex	2002-05-17	Treatment of growth hormone insensitivity syndrome (GHIS)	Designated/Approved	Approved for Orphan Indication	Treatment of growth failure in children with severe primary IGF-1 deficiency (Primary IGFD) or with growth hormone (GH) gene deletion who have developed neutralizing antibodies to growth hormone	2005-12-12
586	sodium oxybate	Xyrem	1994-11-07	Treatment of narcolepsy.	Designated/Approved	Approved for Orphan Indication	Treatment of excessive daytime sleepiness in patients with narcolepsy	2005-11-18
587	Deferasirox	Exjade; Jadenu Sprinkles	2002-11-21	Treatment of chronic iron overload in patients with transfusion-dependent anemias	Designated/Approved	Approved for Orphan Indication	Treatment of chronic iron overload due to blood transfusions (transfusional hemosiderosis) in patients 2 years of age or older	2005-11-02
588	nelarabine	Arranon	2004-08-10	Treatment of acute lymphoblastic leukemia and lymphoblastic lymphoma	Designated/Approved	Approved for Orphan Indication	Treatment of patients with T-cell acute lymphoblastic leukemia and T-cell lymphoblastic lymphoma whose disease has not responded to or has relapsed following treatment with at least two chemotherapy regimens	2005-10-28
589	Mecasermin	Increlex	1995-12-12	Treatment of growth hormone insensitivity syndrome.	Designated/Approved	Approved for Orphan Indication	Long-term treatment of growth failure in children with severe primary IGF-1 deficiency (Primary IGFD) or with growth hormone (GH) gene deletion who have developed neutralizing antibodies to growth hormone.	2005-08-30
590	quinine Sulfate	n/a	2004-06-03	Treatment of malaria	Designated/Approved	Approved for Orphan Indication	Treatment of uncomplicated Plasmodium falciparum malaria	2005-08-12
591	Coagulation factor VIIa (recombinant)	Novoseven	2004-06-18	Prevention of bleeding episodes in patients with hemophilia A or B, with or without inhibitors	Designated/Approved	Approved for Orphan Indication	Prevention of bleeding in surgical interventions or invasive procedures in hemophilia A or B patients with inhibitors to Factor VIII or Factor IX	2005-08-12
592	meloxicam	Mobic	2002-11-22	Treatment of juvenile rheumatoid arthritis	Designated/Approved	Approved for Orphan Indication	For relief of the signs and symptoms of pauciarticular or polyarticular course Juvenile Rheumatoid Arthritis in patients 2 years of age or older	2005-08-11
593	Coagulation factor VIIa (recombinant)	Novoseven	2004-09-10	Treatment of bleeding episodes in patients with congenital factor VII deficiency	Designated/Approved	Approved for Orphan Indication	Treatment of bleeding episodes in patients with Factor VII Deficiency	2005-07-11
594	Coagulation factor VIIa (recombinant)	Novoseven	2004-09-10	Prevention of bleeding episodes in patients with congenital Factor VII deficiency	Designated/Approved	Approved for Orphan Indication	Prevention of bleeding in surgical interventions or invasive procedures in patients with congenital F VII deficiency	2005-07-11
595	N-acetylgalactosamine-4-sulfatase, recombinant human	Naglazyme	1999-02-17	Treatment of mucopolysaccharidosis Type VI (Maroteaux-Lamy syndrome).	Designated/Approved	Approved for Orphan Indication	For patients with mucopolysaccharidosis VI. Galsulfase has been shown to improve walking and stair-climbing capacity.	2005-05-31
596	Vaccinia Immune Globulin (Human) Intravenous	Cnj-016	2004-06-18	Treatment of complications of vaccinia vaccination	Designated/Approved	Approved for Orphan Indication	treatment and/or modification of the following conditions, which are complications resulting from smallpox vaccination: Eczema vaccinatum Progressive vaccinia Severe generalized vaccinia Vaccinia infections in individuals who have skin conditions such as burns, impetigo, varicella-zoster, or poison ivy; or in individuals who have eczematous skin lesions because of either the activity or extensive…	2005-05-02
597	Fluocinolone	Retisert	2000-07-31	Treatment uveitis involving the posterior segment of the eye.	Designated/Approved	Approved for Orphan Indication	Treatment of chronic non-infectious uveitis affecting the posterior segment of the eye	2005-04-08
598	bortezomib	Velcade	2003-01-15	Treatment of multiple myeloma	Designated/Approved	Approved for Orphan Indication	Treatment of multiple myeloma patients who have received at least one prior therapy	2005-03-25
599	temozolomide	Temodar	1998-10-05	Treatment of recurrent malignant glioma.	Designated/Approved	Approved for Orphan Indication	Treatment of adult patients with newly diagnosed glioblastoma multiforme concomitatly with radiotherapy and then as maintenance treatment	2005-03-15
600	Vaccinia Immune Globulin (Human) Intravenous	n/a	2004-06-18	Treatment of severe complications from the smallpox vaccine	Designated/Approved	Approved for Orphan Indication	Treatment and modification of aberrant infections induced by vaccinia virus that include its accidental implantation in eyes (except in cases of isolated keratitis), mouth, or other areas where vaccinia infection would constitute a special hazard; eczema vaccinatum; progressive vaccinia; severe generalized vaccinia, and vaccinia infections in individuals who have skin conditions such as burns, im…	2005-02-18
601	benzoate/phenylacetate	Ammonul	1993-11-22	Treatment of acute hyperammonemia and associated encephalopathy in patients with deficiencies in enzymes of the urea cycle.	Designated/Approved	Approved for Orphan Indication	Adjunctive therapy in the treatment of acute hyperammonemia and associated encephalopathy in patients with deficiencies in enzymes of the urea cycle.	2005-02-17
602	Potassium Iodide Oral Solution	Thyroshield	2004-11-17	For use as a thyroid blocking agent in pediatric patients exposed to radiactive iodine	Designated/Approved	Approved for Orphan Indication	For use as a thyroid blocking agent in pediatric patients exposed to radiactive iodine	2005-01-12
603	Iloprost inhalation solution	Ventavis	2004-08-17	Treatment of pulmonary arterial hypertension	Designated/Approved	Approved for Orphan Indication	Treatment of pulmonary arterial hypertension (WHO Group I) in patients with NYHA Class III or IV symptoms	2004-12-29
604	clofarabine	Clolar	2002-02-07	Treatment of acute lymphoblastic leukemia	Designated/Approved	Approved for Orphan Indication	Treatment of pediatric patients 1 to 21 years old with relapsed or refractory acute lymphoblastic leukemia after at least two prior regimens	2004-12-28
605	Recombinant human luteinizing hormone	Luveris	1994-10-07	For use in association with recombinant human follicle stimulating hormone for the treatment of women with chronic anovulation due to hypogonadotropic hypogonadism.	Designated/Approved	Approved for Orphan Indication	Luveris (lutropin alfa for injection), concomitantly administered with Gonal-f (follitropin alfa for injection), is indicated for stimulation of follicular development in infertile hypogonadotropic hypogonadal women with profound LH deficiency (LH (less than) 1.2 IU/L).	2004-10-08
606	multi-vitamin infusion without vitamin K	M.V.I.-12	2004-03-08	Prevention of vitamin deficiency and thromboembolic complications in people receiving home parenteral nutrition and warfarin-type anticoagulant therapy	Designated/Approved	Approved for Orphan Indication	Prevention of vitamin deficiency and thrombormbolic complications in people receiving home parenteral nutrition who also receive warfarin-type anticoagulant therapy	2004-09-09
607	Diethylenetriaminepentaacetic acid (DTPA)	n/a	2004-04-28	Treatment of patients with known or suspected internal contamination with plutonium, americium, or curium to increase the rates of elimination.	Designated/Approved	Approved for Orphan Indication	Treatment of internal contamination with plutonium, americium or curium	2004-08-11
608	Glutamine	Nutrestore	1995-03-06	For use with human growth hormone in the treatment of short bowel syndrome (nutrient malabsorption from the gastrointestinal tract resulting from an inadequate absorptive surface).	Designated/Approved	Approved for Orphan Indication	Treatment of short bowel syndrome in patients receiving specialized nutritional support when used in conjunction with a recombinant human growth hormone that is approved for this indication.	2004-06-10
609	azacitidine	Vidaza	2001-12-03	Treatament of myelodysplastic syndromes	Designated/Approved	Approved for Orphan Indication	Treatment of patients with the following myelodysplastic syndrome subtypes: refractory anemia or refractory anemia with ringed sideroblasts (if accompanied by neutropenia or thrombocytopenia and requiring transfusions), refractory anemia with excess blasts, refractory anemia with excess blasts in transformation, and chronic myelomonocytic leukemia	2004-05-19
610	tinidazole	Tindamax	2002-04-18	Treatment of giardiasis	Designated/Approved	Approved for Orphan Indication	Treatment of giardiasis caused by G. duodenalis (also termed G. lamblia) in both adults and pediatric patients older than three years of age	2004-05-17
611	Tinidazole	Tindamax	2003-08-20	Treatment of amebiasis	Designated/Approved	Approved for Orphan Indication	Treatment of intestinal amebiasis and amebic liver abcess caused by E. histolytica in both adults and pediatric patients older than three years of age. It is not indicated for the treatment of asymptomatic cyst passage.	2004-05-17
612	Apomorphine HCl	Apokyn	1993-04-22	Treatment of the on-off fluctuations associated with late-stage Parkinson's disease.	Designated/Approved	Approved for Orphan Indication	For the acute, intermittent treatment of hypomobility, "off" episodes ("end-of-dose-wearing-off" and unpredictable :on/off" episodes) associated with advanced Parkinson's disease	2004-04-20
613	Synthetic human secretin	Chirostim	1999-06-16	For use in the diagnosis of gastrinoma associated with Zollinger-Ellison syndrome.	Designated/Approved	Approved for Orphan Indication	Stimulation of pancreatic secretions, including bicarbonate, to aid in the diagnosis of pancreatic exocrine dysfunction, stimulation of gastrin secretion to aid in the diagnosis of gastrinoma, and stimulation of pancreatic secretions to facilitate the identification of the ampulla of Vater and accessory papilla during endoscopic retrograde cholangiopancreatography	2004-04-09
614	cinacalcet	Sensipar	2003-05-12	Treatment of hypercalcemia in patients with parathyroid carcinoma	Designated/Approved	Approved for Orphan Indication	Treatment of hypercalcemia in patients with parathyroid carcinoma	2004-03-08
615	pemetrexed disodium	Alimta	2001-08-28	Treatment of malignant pleural mesothelioma	Designated/Approved	Approved for Orphan Indication	Treatment of patients with malignant pleural mesothelioma whose disease is either unresectable or who are otherwise not candidates for curative surgery	2004-02-04
616	acetylcysteine	Acetadote	2001-10-19	For the intravenous treatment of moderate to severe acetaminophen overdose	Designated/Approved	Approved for Orphan Indication	For the use of Acetadote(registered TM) Injection, administered intravenously within 8 to 10 hours after ingestion of a potentially heptotoxic quantity of acetaminophen, to prevent or lessen hepatic injur	2004-01-23
617	Somatropin (r-DNA)	Zorbtive	1995-03-06	For use alone or in combination with glutamine in the treatment of short bowel syndrome.	Designated/Approved	Approved for Orphan Indication	Treatment of short bowel syndrome in patients receiving specialized nutritional support	2003-12-01
618	Botulism immune globulin	Babybig	1989-01-31	Treatment of infant botulism.	Designated/Approved	Approved for Orphan Indication	Indicated for treatment of infant botulism caused by type A or type B Clostridium botulinum.	2003-10-23
619	iron(III)-hexacyanoferrate(II)	Radiogardase	2003-05-01	Treatment of patients with known or suspected internal contamination with radioactive or non-radioactive cesium or thallium	Designated/Approved	Approved for Orphan Indication	Treatment of patients with known or suspected internal contamination with radioactive cesium and/or radioactive or non-radioactive thallium to increase their rates of elimination	2003-10-02
620	porfimer	Photofrin	2001-10-19	For the ablation of High-Grade Dysplasia in Barrett's Esophagus in patients who are not considered to be candidates for esophagectomy	Designated/Approved	Approved for Orphan Indication	For the ablation of high-grade dysplasia in Barrett's esophagus patients who do not undergo esophagectomy	2003-08-01
621	miglustat	Zavesca	1998-05-29	Treatment of Gaucher disease.	Designated/Approved	Approved for Orphan Indication	Treatment of mild to moderate Type I Gaucher disease in adults for whom enzyme replacement therapy is not a therapeutic option (e.g., due to constraints such as allergy, hypersensitivity, or poor venous access).	2003-07-31
622	ribavirin	Rebetol	2003-04-04	Treatment of chronic hepatitis C in pediatric patients	Designated/Approved	Approved for Orphan Indication	Treatment of chronic hepatitis C among previously untreated pediatric patients at least three years of age or older.	2003-07-29
623	Tositumomab and iodine I 131 tositumomab	Bexxar	1994-05-16	Treatment of non-Hodgkin's B-cell lymphoma.	Designated/Approved	Approved for Orphan Indication	Treatment of patients with CD20 positive, follicular, non-Hodgkin's lymphoma, with and without transformation, whose disease is refractory to Rituximab and has relapsed following chemotherapy	2003-06-27
624	bortezomib	Velcade	2003-01-15	Treatment of multiple myeloma	Designated/Approved	Approved for Orphan Indication	Treatment of multiple myeloma patients who have received at least two prior therapies and have demonstrated disease progression on the last therapy	2003-05-13
625	laronidase	Aldurazyme	1997-09-24	Treatment of patients with mucopolysaccharidosis-I.	Designated/Approved	Approved for Orphan Indication	Treatment for patients with Hurler and Hurler-Scheie forms of Mucopolysaccharidosis I (MPS I) and for patients with the Scheie form who have moderate to severe symptoms	2003-04-30
626	Ceramide trihexosidase/alpha-galactosidase A	Fabrazyme	1988-01-19	Treatment of Fabry's disease.	Designated/Approved	Approved for Orphan Indication	For use in patients with Fabry disease to reduce globotriaosylceramide (GL-3) deposition in capillary endothelium of the kidney and certain other cell types	2003-04-24
627	Pegvisomant	Somavert	1997-06-24	Treatment of acromegaly.	Designated/Approved	Approved for Orphan Indication	Treatment of acromegaly in patients who have had an inadequate response to surgery and/or radiation therapy and/or other medical therapies, or for whom these therapies are not appropriate	2003-03-25
628	polifeprosan 20 with carmustine	Gliadel	1989-12-13	Treatment of malignant glioma.	Designated/Approved	Approved for Orphan Indication	Expanding the indication to include patients with malignant glioma undergoing primary surgical resection.	2003-02-25
629	Icodextrin 7.5% with Electrolytes Peritoneal Dialysis Solution	Extraneal (With 7.5% Icodextrin) Peritoneal Dialysis Solutio	1997-07-18	Treatment of those patients having end stage renal disease and requiring peritoneal dialysis treatment.	Designated/Approved	Approved for Orphan Indication	For use as a single daily exchange for the long (8-16 hour) dwell during continuous ambulatory peritoneal dialysis (CAPD) or automated peritoneal dialysis (APD) for the management of chronic renal failure.	2002-12-20
630	Nitazoxanide	Alinia	1996-12-12	Treatment of cryptosporidiosis.	Designated/Approved	Approved for Orphan Indication	Treatment of diarrhea caused by Cryptosporidium parvum and Giardia lamblia	2002-11-22
631	nitazoxanide	Alinia	2002-02-14	Treatment of intestinal giardiasis	Designated/Approved	Approved for Orphan Indication	Treatment of diarrhea caused by Cryptosporidium parvum and Giardia lamblia	2002-11-22
632	Synthetic porcine secretin	Secreflo	1999-06-18	For use in the evaluation of exocrine pancreas function.	Designated/Approved	Approved for Orphan Indication	For use in secretin stimulation testing for: Stimulation of pancreatic secretions to facilitate the identification of the ampulla of Vater and accessory papilla during endoscopic retrograde cholangio-pancreatography (ERCP)	2002-11-01
633	buprenorphine in combination with naloxone	Suboxone	1994-10-27	Treatment of opiate addiction in opiate users	Designated/Approved	Approved for Orphan Indication	Treatment of opioid dependence in patients 16 years of age or older	2002-10-08
634	sodium oxybate	Xyrem	1994-11-07	Treatment of narcolepsy.	Designated/Approved	Approved for Orphan Indication	Treatment of cataplexy associated with narcolepsy	2002-07-17
635	rasburicase	Elitek	2000-10-11	Treatment of malignancy-associated or chemotherapy-induced hyperuricemia.	Designated/Approved	Approved for Orphan Indication	Initial management of plasma uric acid levels in pediatric patients with leukemia,lymphoma, and solid tumor malignancies who are receiving anti-cancer therapy expected to result in tumor lysis and subsequent elevation of plasma uric acid.	2002-07-12
636	treprostinil	Remodulin;Orenitram	1997-06-04	Treatment of pulmonary arterial hypertension.	Designated/Approved	Approved for Orphan Indication	Treatment of pulmonary arterial hypertension.	2002-05-21
637	Synthetic porcine secretin	Secreflo	1999-06-18	For use in the diagnosis of gastrinoma associated with Zollinger-Ellison syndrome.	Designated/Approved	Approved for Orphan Indication	Use in secretin stimulation testing for stimulation of gastrin secretion to aid in the diagnosis of gastrinoma	2002-04-04
638	Synthetic porcine secretin	Secreflo	2000-03-07	For use in conjunction with diagnostic, therapeutic, or combined diagnostic/therapeutic procedures for pancreatic disorders to increase pancreatic fluid secretion.	Designated/Approved	Approved for Orphan Indication	Use in secretin stimulation testing for stimulation of pancreatic secretions, including bicarbonate, to aid in the diagnosis of pancreatic exocrine dysfunction	2002-04-04
639	ibritumomab tiuxetan	Zevalin	1994-09-06	Treatment of B-cell non-Hodgkin's lymphoma.	Designated/Approved	Approved for Orphan Indication	Treatment of patients with relapsed or refractory low-grade, follicular, or transformed B-cell non-Hodgkin's lymphoma, including patients with Rituximab (Rituxan?) refractory follicular non-Hodgkin?s lymphoma	2002-02-19
640	imatinib mesylate	Gleevec	2001-11-01	Treatment of gastrointestinal stromal tumors	Designated/Approved	Approved for Orphan Indication	Treatment of patients with Kit (CD117) positive unresectable and/or metastatic malignant gastrointestinal stromal tumors (GIST)	2002-02-01
641	Nitisinone	Orfadin	1995-05-16	Treatment of tyrosinemia type 1.	Designated/Approved	Approved for Orphan Indication	Adjunctive therapy to dietary restriction of tyrosine and phenylalanine in the treatment of hereditary tyrosinemia type 1	2002-01-18
642	bosentan	Tracleer	2000-10-06	Treatment of pulmonary arterial hypertension	Designated/Approved	Approved for Orphan Indication	Treatment of pulmonary arterial hypertension.	2001-11-20
643	Topiramate	Topamax	1992-11-25	Treatment of Lennox-Gastaut syndrome.	Designated/Approved	Approved for Orphan Indication	As adjunctive therapy in patients two years and older with siezures associated with Lennox-Gastaut syndrome.	2001-08-28
644	Zoledronate	Zometa, Zabel	2000-08-18	Treatment of tumor induced hypercalcemia.	Designated/Approved	Approved for Orphan Indication	Treatment of hypercalcemia of malignancy.	2001-08-20
645	somatropin [rDNA]	Genotropin	2000-12-27	Treatment of growth failure in children who were born small for gestational age.	Designated/Approved	Approved for Orphan Indication	For long-term treatment of growth failure in children born small for gestational age who fail to manifest catch-up growth by two years of age.	2001-07-25
646	Imatinib	Gleevec	2001-01-31	Treatment of chronic myelogenous leukemia	Designated/Approved	Approved for Orphan Indication	Treatment of patients with chronic myeloid leukemia (CML) in blast crisis, accelerated phase, or in chronic phase after failure of interferon-alpha therapy	2001-05-10
647	alemtuzumab	Campath	1997-10-20	Treatment of chronic lymphocytic leukemia.	Designated/Approved	Approved for Orphan Indication	The treatment of patients with B-cell chronic lymphocytic leukemia who have been treated with alkylating agents and who have failed fludarabine therapy.	2001-05-07
648	Botulinum toxin type A	Botox	1986-08-20	Treatment of cervical dystonia.	Designated/Approved	Approved for Orphan Indication	Treatment of cervical dystonia in adults to decrease the severity of abnormal head position and neck pain associated with cervical dystonia.	2000-12-21
649	Fomepizole	Antizole	1988-12-22	Treatment of methanol or ethylene glycol poisoning.	Designated/Approved	Approved for Orphan Indication	Use for suspected or confirmed methanol poisoning, either alone or in combination with hemodialysis	2000-12-08
650	Botulinum toxin type B	Myobloc	1992-01-16	Treatment of cervical dystonia.	Designated/Approved	Approved for Orphan Indication	Treatment of patients with cervical dystonia to reduce the severity of abnormal head position and neck pain associated with cervical dystonia.	2000-12-08
651	Mitoxantrone	Novantrone	1999-08-13	Treatment of secondary-progressive multiple sclerosis.	Designated/Approved	Approved for Orphan Indication	Reducing neurologic disability and/or the frequency of clinical relapses in patients with secondary (chronic) progressive, progressive relapsing, or worsening relapsing-remitting multiple sclerosis (i.e., patients whose neurologic status is significantly adnormal between relapses).	2000-10-13
652	Mitoxantrone	Novantrone	1999-08-13	Treatment of progressive-relapsing multiple sclerosis.	Designated/Approved	Approved for Orphan Indication	Reducing neurologic disability and/or the frequency of clinical relapses in patients with secondary (chronic) progressive, progressive relapsing, or worsening relapsing-remitting multiple sclerosis (i.e., patients whose neurologic status is significantly adnormal between relapses).	2000-10-13
653	Antivenin, crotalidae polyvalent immune Fab (ovine)	Crofab	1994-01-12	Treatment of envenomations inflicted by North American crotalid snakes.	Designated/Approved	Approved for Orphan Indication	Treatment of minimal and moderate North American Crotalidae envenomation	2000-10-02
654	Arsenic trioxide	Trisenox	1998-03-03	Treatment of acute promyelocytic leukemia.	Designated/Approved	Approved for Orphan Indication	For induction of remission and consolidation in patients with acute promyelocytic leukemia (APL) who are refractory to, or have relapsed from, retinoid and anthracycline chemotherapy, and whose APL is characterized by the presence of the t(15;17) translocation of PML/RAR-alpha gene expression.	2000-09-25
655	Somatropin (rDNA origin) injection	Norditropin	1987-07-10	1. Treatment of growth failure in children due to inadequate growth hormone secretion 2. Treatment of short stature associated with Turner's syndrome	Designated/Approved	Approved for Orphan Indication	Long-term treatment of children who have growth failure due to inadequate secretion of endogenous growth hormone.	2000-06-20
656	Somatropin [rDNA]	Genotropin	1999-07-06	Treatment of short stature in patients with Prader-Willi syndrome.	Designated/Approved	Approved for Orphan Indication	Long-term treatment of pediatric patients who have growth failure due to Prader-Willi syndrome (PWS).	2000-06-20
657	Follitropin alfa, recombinant	Gonal-F	1998-12-21	For the initiation and re-initiation of spermatogenesis in adult males with reproductive failure due to hypothalamic or pituitary dysfunction, hypogonadotropic hypogonadism. AMENDED indication 6/27/00: For the induction of spermatogenesis in men with primary and secondary hypogonadotropic hypogonadism in whom the cause of infertility is not due to primary testicular failure.	Designated/Approved	Approved for Orphan Indication	For the induction of spermatogenesis in men with primary and secondary hypogonadotropic hypogonadism in whom the cause of infertility is not due to primary testicular failure.	2000-05-24
658	Gemtuzumab ozogamicin	Mylotarg	1999-11-24	Treatment of acute myeloid leukemia	Designated/Approved	Approved for Orphan Indication	Treatment of patients with CD33 positive acute myeloid leukemia in first relapse who are 60 years of age or older and who are not considered candidates for cytotoxic chemotherapy	2000-05-17
659	epoprostenol	Flolan	1999-03-22	Treatment of secondary pulmonary hypertension due to intrinsic precapillary pulmonary vascular disease.	Designated/Approved	Approved for Orphan Indication	treatment of pulmonary arterial hypertension (WHO Group 1) to improve exercise capacity. Studies establishing effectiveness included predominantly patients with NYHA Functional Class III-IV symptoms and etiologies of idiopathic or heritable PAH or PAH associated with connective tissue diseases.	2000-04-14
660	Antihemophilic factor (recombinant)	Refacto, Xyntha	1996-02-08	For the control and prevention of hemorrhagic episodes and for surgical prophylaxis in patients with hemophilia A (congenital factor VIII deficiency or classic hemophilia).	Designated/Approved	Approved for Orphan Indication		2000-03-06
661	Interferon gamma-1b	Actimmune	1996-09-30	Delaying time to disease progression in patients with severe, malignant osteopetrosis.	Designated/Approved	Approved for Orphan Indication	Delaying time to disease progression in patients with severe, malignant osteopetrosis.	2000-02-10
662	Bexarotene	Targretin	1999-06-18	Treatment of cutaneous T-cell lymphoma.	Designated/Approved	Approved for Orphan Indication	Treatment of cutaneous manifestations of cutaneous T-cell lymphoma in patients who are refractory to at least one prior systemic therapy.	1999-12-29
663	Nitric oxide	Inomax	1993-06-22	Treatment of persistent pulmonary hypertension in the newborn.	Designated/Approved	Approved for Orphan Indication	In conjunction with ventilatory support and other appropriate agents, in the treatment of term and near-term (>34 weeks) neonates with hypoxic respiratory failure associated with clinical or echocardiographic evidence of pulmonary hypertension, where it improves oxygenation and reduces the need for extracorporeal membrane oxygenation.	1999-12-23
664	Somatropin (rDNA origin)	Nutropin Depot	1999-10-28	Long-term treatment of children who have growth failure due to a lack of adequate endogenous growth hormone secretion.	Designated/Approved	Approved for Orphan Indication	Long-term treatment of growth failure due to a lack of adequate endogenous growth hormone secetion for once- or twice-a-month administration.	1999-12-22
665	Levocarnitine	Carnitor	1988-09-06	Treatment of manifestations of carnitine deficiency in patients with end stage renal disease who require dialysis.	Designated/Approved	Approved for Orphan Indication	Prevention and treatment of carnitine deficiency in patients with end stage renal disease who are undergoing dialysis.	1999-12-15
666	Pulmonary surfactant replacement, porcine	Curosurf	1993-08-02	For the treatment and prevention of respiratory distress syndrome in premature infants.	Designated/Approved	Approved for Orphan Indication	Treatment (rescue) of respiratory distress syndrome in premature infants.	1999-11-18
667	Exemestane	Aromasin	1991-09-19	Treatment of advanced breast cancer in postmenopausal women whose disease has progressed following tamoxifen therapy.	Designated/Approved	Approved for Orphan Indication	Treatment of advanced breast cancer in postmenopausal women whose disease has progressed following tamoxifen therapy.	1999-10-21
668	Caffeine	Cafcit	1988-09-20	Treatment of apnea of prematurity.	Designated/Approved	Approved for Orphan Indication	Short term treatment of apnea of prematurity in infants between 28 and less than 33 weeks gestational age.	1999-09-21
669	Epirubicin	Ellence	1999-09-14	Treatment of breast cancer.	Designated/Approved	Approved for Orphan Indication	Component of adjuvant therapy in patients with evidence of axillary node tumor involvement following resection of primary breast cancer.	1999-09-15
670	temozolomide	Temodar	1998-10-05	Treatment of recurrent malignant glioma.	Designated/Approved	Approved for Orphan Indication	Treatment of adult patients with refractory anaplastic astrocytoma, i.e., patients at first relapse who have experienced disease progression on a drug regimen containing a nitrosourea and procarbazine	1999-08-11
671	Doxorubicin liposome	Doxil	1998-11-04	Treatment of ovarian cancer.	Designated/Approved	Approved for Orphan Indication	Treatment of metastatic carcinoma of the ovary in patients with disease that is refractory to both paclitaxel- and platinium-based chemotherapy regimens. Refractory disease is defined as disease that has progressed while on treatment, or within 6 months of completing treatment.	1999-06-28
672	Amifostine	Ethyol	1998-05-12	Reduction of the incidence of moderate to severe xerostomia in patients undergoing post-operative radiation treatment for head and neck cancer.	Designated/Approved	Approved for Orphan Indication	Reduction of the incidence of moderate to severe xerostomia in patients undergoing post-operative radiation treatment for head and neck cancer, where the radiation port includes a substantial portion of the parotid glands.	1999-06-24
673	etanercept	Enbrel	1998-10-27	Reduction in signs and symptoms of moderately to severely active polyarticular-course juvenile rheumatoid arthritis in patients who have had an inadequate response to one or more disease-modifying anti-rheumatic drugs.	Designated/Approved	Approved for Orphan Indication	Reducing signs and symptoms of moderately to severely active polyarticular juvenile idiopathic arthritis (JIA) in patients ages 2 and older	1999-05-27
674	Antihemophilic factor/von Willebrand factor complex (human), dried, pasteurized	Humate-P	1992-10-16	Treatment of patients with von Willebrand's disease	Designated/Approved	Approved for Orphan Indication	(1) In adult patients for treatment and prevention of bleeding in hemophilia A (classic hemophilia) and (2) in adult and pediatric patients for treatment of spontaneous and trauma-induced bleeding episodes in severe von Willebrand disease, and in mild and moderate von Willebrand disease where use of desmopressin is known or suspected to be inadequate.	1999-04-01
675	Cytarabine liposomal	Depocyt	1993-06-02	Treatment of neoplastic meningitis.	Designated/Approved	Approved for Orphan Indication	Intrathecal treatment of lymphomatous meningitis.	1999-04-01
676	Coagulation factor VIIa (recombinant)	Novoseven	1988-06-06	Treatment of bleeding episodes in hemophilia A or B patients with inhibitors to Factor VIII or Factor IX.	Designated/Approved	Approved for Orphan Indication	Treatment of bleeding episodes in hemophilia A or B patients with inhibitors to Factor VIII or Factor IX.	1999-03-25
677	Lidocaine patch 5%	Lidoderm Patch	1995-10-24	For relief of allodynia (painful hypersensitivity), and chronic pain in postherpetic neuralgia.	Designated/Approved	Approved for Orphan Indication		1999-03-19
678	denileukin diftitox	Ontak	1996-08-21	Treatment of patients with cutaneous T-cell lymphoma	Designated/Approved	Approved for Orphan Indication	Treatment of patients with persistent or recurrent cutaneous T-cell lymphoma whose malignant cells express the CD25 component of the IL-2 receptor.	1999-02-05
679	Busulfan	Busulfex	1994-07-28	As preparative therapy in the treatment of malignancies with bone marrow transplantation.	Designated/Approved	Approved for Orphan Indication	For use in combination with cyclophosphamide as a conditioning regimen prior to allogeneic hematopoietic progenitor cell transplantation for chronic myelogenous leukemia.	1999-02-04
680	Alitretinoin	Panretin	1998-03-24	Treatment of AIDS-related Kaposi's sarcoma.	Designated/Approved	Approved for Orphan Indication	Topical treatment of cutaneous lesions in patients with AIDS-related Kaposi's sarcoma.	1999-02-02
681	Atovaquone	Mepron	1991-08-14	Prevention of Pneumocystis carinii pneumonia (PCP) in high-risk, HIV-infected patients defined by a history of one or more episodes of PCP and/or a peripheral CD4+ (T4 helper/inducer) lymphocyte count less than or equal to 200/mm3.	Designated/Approved	Approved for Orphan Indication	Prevention of PCP in patients who are intolerant to trimethoprim-sulfamethoxazole.	1999-01-05
682	Modafinil	Provigil	1993-03-15	Treatment of excessive daytime sleepiness in narcolepsy.	Designated/Approved	Approved for Orphan Indication	Improve wakefulness in patients with excessive daytime sleepiness associated with narcolepsy.	1998-12-24
683	Cytomegalovirus immune globulin (human)	Cytogam	1987-08-03	Prevention or attenuation of primary cytomegalovirus disease in immunosuppressed recipients of organ transplants.	Designated/Approved	Approved for Orphan Indication	#1) Attenuation of primary CMV disease associated with kidney transplant recipients who are seronegative for CMV and who receive a kidney from a CMV seropositve donor; #2) Prophylaxis of CMV disease associated transplantation of kidney (all other), lung, liver, pancreas and heart.	1998-12-04
684	Thyrotropin alpha	Thyrogen	1992-02-24	As an adjunct in the diagnosis of thyroid cancer.	Designated/Approved	Approved for Orphan Indication	As an adjunctive diagnostic tool for serum thyroglobulin (Tg) testing with or without radioiodine imaging in the follow-up of patients with thyroid cancer.	1998-11-30
685	Octreotide	Sandostatin Lar	1998-08-24	Treatment of acromegaly.	Designated/Approved	Approved for Orphan Indication	Reduction of growth hormone and IGF-1 (somatomedin C) in acromegaly.	1998-11-25
686	Octreotide	Sandostatin Lar	1998-08-24	Treatment of severe diarrhea and flushing associated with malignant carcinoid tumors.	Designated/Approved	Approved for Orphan Indication	Supression of severe diarrhea and flushing associated with malignant carcinoid syndrome.	1998-11-25
687	Octreotide	Sandostatin Lar	1998-08-24	Treatment of diarrhea associated with vasoactive intestinal peptide tumors (VIPoma).	Designated/Approved	Approved for Orphan Indication	Treatment of profuse watery diarrhea associated with VIPoma.	1998-11-25
688	Valrubicin	Valstar	1994-05-23	Treatment of carcinoma in situ of the urinary bladder.	Designated/Approved	Approved for Orphan Indication	For intravesical therapy of BCG-refractory carcinoma in situ of the urinary bladder in patients for whom immediate cystectomy would be associated with unacceptable morbidity or mortality.	1998-09-25
689	Lamotrigine	Lamictal	1995-08-23	Treatment of Lennox-Gastaut syndrome.	Designated/Approved	Approved for Orphan Indication	Adjunctive treatment of Lennox-Gastaut syndrome in pediatric and adult patients.	1998-08-24
690	infliximab	Remicade	1995-11-14	Treatment of Crohn's disease	Designated/Approved	Approved for Orphan Indication	Treatment of moderately to severely active Crohn's disease for the reduction of the signs and symptoms, in patients who have an inadequate response to conventional therapies; and treatment of patients with fistulizing Crohn's disease for the reduction in the number of draining enterocutaneous fistula(s).	1998-08-24
691	Thalidomide	Thalomid	1995-07-26	Treatment of erythema nodosum leprosum.	Designated/Approved	Approved for Orphan Indication	Acute treatment of the cutaneous manifestations of moderate to severe erythema nodosum leprosum (ENL) and as maintenance therapy for prevention and suppression of the cutaneous manifestations of ENL recurrences.	1998-07-16
692	calfactant	Infasurf	1985-06-07	Treatment and prevention of respiratory failure due to pulmonary surfactant deficiency in preterm infants.	Designated/Approved	Approved for Orphan Indication	Treatment and prevention of respiratory failure due to pulmonary surfactant deficiency in preterm infants.	1998-07-01
693	Rifapentine	Priftin	1995-06-09	Treatment of pulmonary tuberculosis.	Designated/Approved	Approved for Orphan Indication		1998-06-22
694	Mafenide acetate solution	Sulfamylon Solution	1990-07-18	For use as an adjunctive topical antimicrobial agent to control bacterial infection when used under moist dressings over meshed autografts on excised burn wounds.	Designated/Approved	Approved for Orphan Indication		1998-06-05
695	Basiliximab	Simulect	1997-12-12	Prophylaxis of solid organ rejection.	Designated/Approved	Approved for Orphan Indication	Prophylaxis of acute organ rejection in patients receiving renal transplantation when used as part of an immunosuppressive regimen that includes cyclosporine and corticosteroids.	1998-05-12
696	Sacrosidase	Sucraid	1993-12-10	Treatment of congenital sucrase-isomaltase deficiency	Designated/Approved	Approved for Orphan Indication	Oral replacement therapy of the genetically determined sucrase deficiency, which is part of congenital sucrease-isomaltase deficiency.	1998-04-09
697	Filgrastim	Neupogen	1996-11-07	Reduction in the duration of neutropenia, fever, antibiotic use, and hospitalization, following induction and consolidation treatment for acute myeloid leukemia.	Designated/Approved	Approved for Orphan Indication	Reducing the time to neutrophil recovery and the duration of fever, following induction or consolidation chemotherapy treatment of adults with acute myeloid leukemia.	1998-04-02
698	Lepirudin	Refluden	1997-02-13	Treatment of heparin-associated thrombocytopenia type II.	Designated/Approved	Approved for Orphan Indication	For anticoagulation in patients with heparin-induced thrombocytopenia and associated thromboembolic disease in order to prevent further thromboembolic complications.	1998-03-06
699	Hydroxyurea	Droxia	1990-10-01	Treatment of patients with sickle cell anemia as shown by the presence of hemoglobin S.	Designated/Approved	Approved for Orphan Indication	To reduce the frequency of painful crises and to reduce the need for blood transfusions in adult patients with sickle cell anemia with recurrent moderate to severe painful crises (generally at least 3 during the preceding 12 months).	1998-02-25
700	Pilocarpine HCl	Salagen	1992-02-28	Treatment of xerostomia and keratoconjunctivitis sicca in Sjogren's syndrome patients.	Designated/Approved	Approved for Orphan Indication	Treatment of dry mouth in patients with Sjogren's syndrome.	1998-02-11
701	Aldesleukin	Proleukin	1996-09-10	Treatment of metastatic melanoma.	Designated/Approved	Approved for Orphan Indication	Treatment of adults with metastatic melanoma.	1998-01-09
702	Sterile talc powder	Sclerosol Intrapleural Aerosol	1995-09-18	Treatment of malignant pleural effusion.	Designated/Approved	Approved for Orphan Indication	Prevention of recurrence of malignant pleural effusions in symptomatic patients.	1997-12-24
703	Tobramycin for inhalation	Tobi	1994-10-13	Treatment of bronchopulmonary infections of Pseudomonas aeruginosa in cystic fibrosis patients.	Designated/Approved	Approved for Orphan Indication	Management of cystic fibrosis patients with P.aeruginosa.	1997-12-22
704	Somatropin for injection	Nutropin	1996-11-18	As replacement therapy for growth hormone deficiency in adults after epiphyseal closure.	Designated/Approved	Approved for Orphan Indication		1997-12-15
705	Ursodiol	Urso 250	1991-06-20	Treatment of patients with primary biliary cirrhosis	Designated/Approved	Approved for Orphan Indication		1997-12-10
706	Daclizumab	Zenapax	1993-03-05	Prevention of acute renal allograft rejection.	Designated/Approved	Approved for Orphan Indication	Prophylaxis of acute organ rejection in patients receiving renal transplants, to be used as a part of an immunosuppressive regimen that includes cyclosporine and corticosteroids.	1997-12-10
707	Fomepizole	Antizole	1988-12-22	Treatment of methanol or ethylene glycol poisoning.	Designated/Approved	Approved for Orphan Indication	As an antidote to ethylene glycol (antifreeze) poisoning, or for use in suspected ethylene glycol ingestion.	1997-12-04
708	rituximab	Rituxan	1994-06-13	Treatment of non-Hodgkin's B-cell lymphoma	Designated/Approved	Approved for Orphan Indication		1997-11-26
709	Oprelvekin	Neumega	1996-12-17	Prevention of severe chemotherapy-induced thrombocytopenia.	Designated/Approved	Approved for Orphan Indication		1997-11-25
710	Somatropin	Genotropin	1994-09-06	Treatment of adults with growth hormone deficiency.	Designated/Approved	Approved for Orphan Indication		1997-10-31
711	Sermorelin acetate	Geref	1988-09-14	Treatment of idiopathic or organic growth hormone deficiency in children with growth failure.	Designated/Approved	Approved for Orphan Indication		1997-09-26
712	Liposomal amphotericin B	Ambisome	1996-12-10	Treatment of cryptococcal meningitis.	Designated/Approved	Approved for Orphan Indication	Treatment of disseminated cryptococcosis including meningitis.	1997-08-11
713	Liposomal amphotericin B	Ambisome	1996-12-06	Treatment of visceral leishmaniasis.	Designated/Approved	Approved for Orphan Indication	Treatment of visceral leishmaniasis.	1997-08-11
714	Paclitaxel	Taxol	1997-03-25	Treatment of AIDS-related Kaposi's sarcoma.	Designated/Approved	Approved for Orphan Indication	For the second line treatment of AIDS-related Kaposi's sarcoma.	1997-08-04
715	Diazepam viscous solution for rectal administration	Diastat	1992-02-25	For the management of selected, refractory, patients with epilepsy, on stable regimens of antiepileptic drugs (AEDs), who require intermittent use of diazepam to control bouts of increased seizure activity.	Designated/Approved	Approved for Orphan Indication		1997-07-29
716	Toremifene	Fareston	1991-09-19	Hormonal therapy of metastatic carcinoma of the breast.	Designated/Approved	Approved for Orphan Indication	Treatment of metastatic breast cancer in postmenopausal women with estrogen positive or receptor unknown tumors.	1997-05-29
717	Anagrelide	Agrylin	1988-01-27	Treatment of essential thrombocythemia.	Designated/Approved	Approved for Orphan Indication	Treatment of patients with essential thrombocythemia to reduce the elevated platelet count and the risk of thrombosis and to ameliorate associated symptoms.	1997-03-14
718	Coagulation Factor IX (recombinant)	Benefix	1994-10-03	Treatment of hemophilia B.	Designated/Approved	Approved for Orphan Indication	For the control and prevention of hemorrhagic episodes in patients with hemophilia B (congenital factor IX deficiency and Christmas disease), including control and prevention of bleeding in surgical settings.	1997-02-11
719	Zinc acetate	Galzin	1985-11-06	Treatment of Wilson's disease.	Designated/Approved	Approved for Orphan Indication	For maintenance treatment of patients with Wilson's disease who have been initially treated with a chelating agent.	1997-01-28
720	Somatropin for injection	Nutropin	1989-03-23	Treatment of short stature associated with Turner's syndrome.	Designated/Approved	Approved for Orphan Indication	Treatment of growth failure associated with Turner syndrome.	1996-12-30
721	Somatropin	Humatrope	1990-05-08	Treatment of short stature associated with Turner syndrome.	Designated/Approved	Approved for Orphan Indication	Treatment of short stature associated with Turner syndrome in patients whose epiphyses are not closed.	1996-12-30
722	glatiramer acetate	Copaxone	1987-11-09	Treatment of multiple sclerosis	Designated/Approved	Approved for Orphan Indication	For reduction of the frequency of relapses in patients with relapsing-remitting multiple sclerosis.	1996-12-20
723	Mitoxantrone	Novantrone	1996-08-21	Treatment of hormone refractory prostate cancer.	Designated/Approved	Approved for Orphan Indication	In combination with corticosteroids as initial chemotherapy for the treatment of patients with pain related to advanced hormone-refractory prostate cancer.	1996-11-13
724	Betaine	Cystadane	1994-05-16	Treatment of homocystinuria.	Designated/Approved	Approved for Orphan Indication	Treatment of homocystinuria to decrease elevated homocysteine blood levels.	1996-10-25
725	Amphotericin B lipid complex	Abelcet	1991-12-05	Treatment of invasive fungal infections.	Designated/Approved	Approved for Orphan Indication	Treatment of invasive fungal infections in patients who are refractory to or intolerant of conventional amphotericin B therapy.	1996-10-18
726	Somatropin (rDNA origin)	Saizen	1987-03-06	Treatment of idiopathic or organic growth hormone deficiency in children with growth failure.	Designated/Approved	Approved for Orphan Indication	Long term treatment of children with growth failure due to inadequate secretion of endogenous growth hormone.	1996-10-08
727	Clonidine	Duraclon	1989-01-24	For continous epidural administration as adjunctive therapy with intraspinal opiates for the treatment of pain in cancer patients tolerant to, or unresponsive to, intraspinal opiates.	Designated/Approved	Approved for Orphan Indication	In combination with opiates for the treatment of severe pain in cancer patients that is not adequately relieved by opioid analgesics alone.	1996-10-02
728	Buffered intrathecal electrolyte/dextrose injection	Elliotts B Solution	1994-08-24	For use as a diluent in the intrathecal administration of methotrexate and cytarabine for the prevention or treatment meningeal leukemia and lymphocytic lymphoma	Designated/Approved	Approved for Orphan Indication	For the intrathecal administration of methotrexate and cytarabine for the prevention or treatment of meningeal leukemia and lymphocytic lymphoma.	1996-09-27
729	Pentosan polysulfate sodium	Elmiron	1985-08-07	Treatment of interstitial cystitis.	Designated/Approved	Approved for Orphan Indication	Relief of bladder pain or discomfort associated with interstitial cystitis.	1996-09-26
730	polifeprosan 20 with carmustine	Gliadel	1989-12-13	Treatment of malignant glioma.	Designated/Approved	Approved for Orphan Indication	As an adjunct to surgery to prolong survival in patients with recurrent glioblastoma multiforme for whom surgical resection is indicated	1996-09-23
731	Midodrine HCl	Amatine	1985-06-21	Treatment of patients with symptomatic orthostatic hypotension.	Designated/Approved	Approved for Orphan Indication	Treatment of symptomatic orthostatic hypotension.	1996-09-06
732	Somatropin for injection	Serostim	1991-11-15	Treatment of AIDS-associated catabolism/weight loss.	Designated/Approved	Approved for Orphan Indication	Treatment of AIDS wasting or cachexia.	1996-08-23
733	Fosphenytoin	Cerebyx	1991-06-04	For the acute treatment of patients with status epilepticus of the grand mal type.	Designated/Approved	Approved for Orphan Indication	For the control of generalized convulsive status epilepticus.	1996-08-05
734	Albendazole	Albenza	1996-01-17	Treatment of hydatid disease (cystic echinococcosis due to E. granulosus larvae or alveolar echinococcosis due to E. multilocularis larvae).	Designated/Approved	Approved for Orphan Indication	Treatment of cystic hydatid disease of the liver, lung, and peritoneum, caused by the larval form of the dog tapeworm, Echinococcus granulosus.	1996-06-11
735	Albendazole	Albenza	1996-01-18	Treatment of neurocysticercosis due to Taenia solium as: 1) chemotherapy of parenchymal, subarachnoidal and racemose (cysts in spinal fluid) neurocysticercosis in symptomatic cases and 2) prophylaxis of epilepsy and other sequelae in asymptomatic neurocysticercosis.	Designated/Approved	Approved for Orphan Indication	Treatment of parenchymal neurocysticercosis due to active lesions caused by larval forms of the pork tapeworm, Taenia solium.	1996-06-11
736	Corticorelin ovine triflutate	Acthrel	1989-11-24	For use in differentiating pituitary and ectopic production of ACTH in patients with ACTH-dependent Cushings syndrome.	Designated/Approved	Approved for Orphan Indication	To differentiate between pituitary and ectopic production of ACTH in patients with ACTH-dependent Cushing's syndrome.	1996-05-23
737	Ofloxacin	Ocuflox Ophthalmic Solution	1991-04-18	Treatment of bacterial corneal ulcers.	Designated/Approved	Approved for Orphan Indication	Treatment of bacterial corneal ulcers.	1996-05-22
738	Interferon beta-1a	Avonex	1991-12-16	Treatment of multiple sclerosis.	Designated/Approved	Approved for Orphan Indication	Treatment of relapsing forms of multiple sclerosis to slow the accumulation of physical disability and decrease the frequency of clinical exacerbations.	1996-05-17
739	Allopurinol sodium	Aloprim For Injection	1992-10-16	Management of patients with leukemia, lymphoma, and solid tumor malignancies who are receiving cancer therapy which causes elevations of serum and urinary uric acid levels and who cannot tolerate oral therapy.	Designated/Approved	Approved for Orphan Indication	Management of patients with leukemia, lymphoma, and solid tumor malignancies who are receiving cancer therapy which causes elevations of serum and urinary uric acid levels and who cannot tolerate oral therapy.	1996-05-17
740	sodium phenylbutyrate	Buphenyl	1993-11-22	Treatment of urea cycle disorders: carbamylphosphate synthetase deficiency, ornithine transcarbamylase deficiency, and arginiosuccinic acid synthetase deficiency.	Designated/Approved	Approved for Orphan Indication	Adjunctive therapy in the chronic managment of patients with urea cycle disorders involving deficiencies of carbamylphosphate synthetase, ornithine transcarbamylase, or argininosuccinic acid synthetase.	1996-04-30
741	Daunorubicin citrate liposome injection	Daunoxome	1993-05-14	Treatment of patients with advanced HIV-associated Kaposi's sarcoma.	Designated/Approved	Approved for Orphan Indication	First line cytotoxic therapy for advanced, HIV related Kaposi's sarcoma.	1996-04-08
742	Ganciclovir intravitreal implant	Vitrasert Implant	1995-06-07	Treatment of cytomegalovirus retinitis.	Designated/Approved	Approved for Orphan Indication	Treatment of CMV retinitis in patients with acquired immunodeficiency syndrome.	1996-03-04
743	Bleomycin sulfate	Blenoxane	1993-09-17	Treatment of malignant pleural effusion.	Designated/Approved	Approved for Orphan Indication	Treatment of malignant pleural effusion.	1996-02-20
744	Respiratory syncytial virus immune globulin (Human)	Respigam	1990-09-27	Prophylaxis of respiratory syncytial virus lower respiratory tract infections in infants and young children at high risk of RSV disease.	Designated/Approved	Approved for Orphan Indication	For the prevention of serious lower respiratory tract infections caused by RSV in children less than 24 months of age with bronchopulmonary dysplasia or a history of prematurity (less than or equal to 35 weeks gestation).	1996-01-18
745	Filgrastim	Neupogen	1995-07-17	For use in the mobilization of peripheral blood progenitor cells for collection in patients who will receive myeloablative or myelosuppressive chemotherapy.	Designated/Approved	Approved for Orphan Indication	For use in the mobilization of hematopoietic progenitor cells into the peripheral blood collection by leukapheresis.	1995-12-28
746	Porfimer sodium	Photofrin	1989-06-06	For the photodynamic therapy of patients with primary or recurrent obstructing (either partially or completely) esophageal carcinoma.	Designated/Approved	Approved for Orphan Indication	Photodynamic therapy with PHOTOFRIN for the palliation of patients with completely obstructing esophageal cancer, or of patients with partially obstructing esophageal cancer who cannot be satisfactorily treated with Nd:YAG laser therapy.	1995-12-27
747	Riluzole	Rilutek	1993-03-16	Treatment of amyotrophic lateral sclerosis.	Designated/Approved	Approved for Orphan Indication	Treatment of patients with amyotrophic lateral sclerosis. Riluzole extends survival and/or time to tracheostomy.	1995-12-12
748	Amifostine	Ethyol	1990-05-30	For use as a chemoprotective agent for cisplatin in the treatment of advanced ovarian carcinoma.	Designated/Approved	Approved for Orphan Indication	To reduce the cumulative renal toxicity associated with repeated administration of cisplatin in patients with advanced ovarian cancer.	1995-12-08
749	Tretinoin	Vesanoid	1990-10-24	Treatment of acute promyelocytic leukemia.	Designated/Approved	Approved for Orphan Indication	Induction of remission in patients with acute promyelocytic leukemia who are refractory to or unable to tolerate anthracycline based cytotoxic chemotherapeutic regimens.	1995-11-22
750	Interferon alfa-2a	Roferon A	1989-06-06	Treatment of chronic myelogenous leukemia.	Designated/Approved	Approved for Orphan Indication	Treatment of chronic myelogenous leukemia.	1995-10-19
751	Epoprostenol	Flolan	1985-09-25	Treatment of primary pulmonary hypertension.	Designated/Approved	Approved for Orphan Indication	Long-term intravenous treatment of primary pulmonary hypertension in NYHA Class III and Class IV patients.	1995-09-20
752	Sargramostim	Leukine	1995-03-06	To reduce neutropenia and leukopenia and decrease the incidence of death due to infection in patients with acute myelogenous leukemia.	Designated/Approved	Approved for Orphan Indication	Following induction chemotherapy in older adult patients with acute myelogenous leukemia to shorten time to neutrophil recovery and to reduce the incidence of severe and life-threatening infections and infections resulting in death.	1995-09-15
753	Amiodarone HCl	Cordarone	1994-03-16	For the acute treatment and prophylaxis of life-threatening ventricular tachycardia or ventricular fibrillation.	Designated/Approved	Approved for Orphan Indication	For initiation of treatment and prophylaxis of frequently recurring ventricular fibrillation and hemodynamically unstable ventricular tachycardia in patients refractory to other therapy.	1995-08-03
754	Dexrazoxane	Zinecard	1991-12-17	For the prevention of cardiomyopathy associated with doxorubicin administration.	Designated/Approved	Approved for Orphan Indication	Cardiomyopathy associated with doxorubicin administration in women with metastatic breast cancer who have received a cumulative dose of 300mg/m2.	1995-05-26
755	Rho (D) immune globulin intravenous (human)	Winrho Sd	1993-11-09	Treatment of immune thrombocytopenic purpura.	Designated/Approved	Approved for Orphan Indication	Treatment of adults and children with chronic and acute immune thrombocytopenic purpura.	1995-03-24
756	Filgrastim	Neupogen	1990-11-07	Treatment of patients with severe chronic neutropenia (absolute neutrophil count less than 500/mm3).	Designated/Approved	Approved for Orphan Indication	Treatment of patients with severe chronic neutropenia.	1994-12-19
757	Cysteamine	Cystagon	1991-01-25	Treatment of nephropathic cystinosis.	Designated/Approved	Approved for Orphan Indication	Treatment of nephropathic cystinosis in adults and children.	1994-08-15
758	Sulfadiazine	n/a	1994-03-14	For use in combination with pyrimethamine for the treatment of Toxoplasma gondii encephalitis in patients with and without AIDS.	Designated/Approved	Approved for Orphan Indication	Toxoplasmosis, as adjunctive with pyrimethamine	1994-07-29
759	Aminosalicylic acid	Paser Granules	1992-02-19	Treatment of tuberculosis infections	Designated/Approved	Approved for Orphan Indication	Treatment of tuberculosis	1994-06-30
760	Filgrastim	Neupogen	1990-10-01	Treatment of neutropenia associated with bone marrow transplants.	Designated/Approved	Approved for Orphan Indication	Reduce the duration of neutropenia and neutropenia sequelae in patients with non-myeloid malignancies undergoing ablative chemotherapy followed by BMT.	1994-06-15
761	Rifampin, isoniazid, pyrazinamide	Rifater	1985-09-12	For the short-course treatment of tuberculosis.	Designated/Approved	Approved for Orphan Indication	Short-course treatment of tuberculosis.	1994-05-31
762	Imiglucerase	Cerezyme	1991-11-05	Replacement therapy in patients with types I, II, and III Gaucher's disease.	Designated/Approved	Approved for Orphan Indication	Enzyme replacement therapy in patients with type I Gaucher's disease.	1994-05-23
763	Iobenguane Sulfate I 131	n/a	1984-11-14	For use as a diagnostic adjunct in patients with pheochromocytoma.	Designated/Approved/Withdrawn		Adjunctive diagnostic agent in the localization of primary or metastatic pheochromocytomas.	N/A
764	Pilocarpine	Salagen	1990-09-24	Treatment of xerostomia induced by radiation therapy for head and neck cancer.	Designated/Approved	Approved for Orphan Indication	Treatment of symptoms of xerostomia from salivary gland hypofunction caused by radiotherapy for cancer of the head and neck.	1994-03-22
765	Desmopressin acetate	n/a	1991-01-22	Treatment of mild hemophilia A and von Willebrand's disease.	Designated/Approved	Approved for Orphan Indication	Treatment of patients with hemophilia A or von Willebrand's disease (type I) whose factor VIII coagulant activity level is greater than 5%.	1994-03-07
766	Pegaspargase	Oncaspar; Asparlas	1989-10-20	Treatment of acute lymphocytic leukemia.	Designated/Approved	Approved for Orphan Indication	Combination chemotherapy for the treatment of patients with acute lymphoblastic leukemia who are hypersensitive to native forms of L-asparaginase.	1994-02-01
767	Dornase alfa	Pulmozyme	1991-01-16	To reduce mucous viscosity and enable the clearance of airway secretions in patients with cystic fibrosis.	Designated/Approved	Approved for Orphan Indication	In conjunction with standard therapies in the management of cystic fibrosis patients to reduce the frequency of respiratory infections requiring parenteral antibiotics and to improve pulmonary function.	1993-12-30
768	Aprotinin	Trasylol	1993-11-17	For prophylactic use to reduce perioperative blood loss and the homologous blood transfusion requirement in patients undergoing cardiopulmonary bypass surgery in the course of repeat coronary artery bypass graft surgery, and in selected cases of primary coronary artery bypass graft surgery where the risk of bleeding is especially high (impaired hemostasis) or where transfusion is unavailable or u…	Designated/Approved	Approved for Orphan Indication		1993-12-29
769	Immune globulin intravenous, human	Gamimune N	1993-02-18	Infection prophylaxis in pediatric patients affected with the human immunodeficiency virus.	Designated/Approved	Approved for Orphan Indication	For prophylaxis of children with clinical or immunologic evidence of human immunodeficiency virus to decrease the frequency of serious and minor bacterial infections and the frequency of hospitalization, and to increase the time free of serious bacterial infections.	1993-12-27
770	Trimetrexate glucuronate	Neutrexin	1986-05-15	Treatment of Pneumocystis carinii pneumonia in AIDS patients.	Designated/Approved	Approved for Orphan Indication	Concurrent leucovorin administration as an alternative therapy for the treatment of moderate to severe PCP in immunocompromised patients who are intolerant of, or are refractory to, trimethoprim sulfamethoxazole.	1993-12-17
771	Somatropin for injection	Nutropin	1989-08-04	Treatment of growth retardation associated with chronic renal failure.	Designated/Approved	Approved for Orphan Indication	Treatment of children with growth failure associated with chronic renal insufficency.	1993-11-17
772	Lodoxamide tromethamine	Alomide Ophthalmic Solution	1991-10-16	Treatment of vernal keratoconjunctivitis.	Designated/Approved	Approved for Orphan Indication	Treatment of ocular disorders referred to by the terms vernal keratoconjunctivitis, vernal conjunctivitis, vernal keratitis.	1993-09-23
773	Megestrol acetate	Megace	1988-04-13	Treatment of patients with anorexia, cachexia, or significant weight loss (=/>10% of baseline body weight) and confirmed diagnosis of AIDS.	Designated/Approved	Approved for Orphan Indication	Treatment of anorexia, cachexia, or an unexplained significant weight loss in patients with a diagnosis of acquired immune deficiency syndrome.	1993-09-10
774	Felbamate	Felbatol	1989-01-24	Treatment of Lennox-Gastaut syndrome.	Designated/Approved	Approved for Orphan Indication	As adjunctive therapy in the treatment of partial and generalized seizures associated with the Lennox-Gastaut syndrome in children.	1993-07-29
775	Interferon beta-1b	Betaseron	1988-11-17	Treatment of multiple sclerosis.	Designated/Approved	Approved for Orphan Indication	In ambulatory patients with relapsing-remitting multiple sclerosis to reduce the frequency of clinical exacerbations.	1993-07-23
776	Levomethadyl acetate hydrochloride	Orlaam	1985-01-24	Treatment of heroin addicts suitable for maintenance on opiate agonists.	Designated/Approved	Approved for Orphan Indication	For the management of opiate dependence.	1993-07-09
777	Leuprolide acetate	Lupron Injection	1988-07-25	Treatment of central precocious puberty	Designated/Approved	Approved for Orphan Indication	Treatment of children with central precocious puberty	1993-04-16
778	Cladribine	Leustatin Injection	1990-11-15	Treatment of hairy cell leukemia.	Designated/Approved	Approved for Orphan Indication		1993-02-26
779	Antihemophilic factor (recombinant)	Kogenate	1989-09-25	Prophylaxis and treatment of bleeding in individuals with hemophilia A or for prophylaxis when surgery is required in individuals with hemophilia A.	Designated/Approved	Approved for Orphan Indication	Treatment and prophylaxis of bleeding in patients with hemophilia A (not von Willebrand's disease)	1993-02-25
780	Satumomab pendetide	Oncoscint Cr/Ov	1989-09-25	Detection of ovarian carcinoma.	Designated/Approved	Approved for Orphan Indication	For determining the extent and location of extraphepatic malignant disease in patients with known colorectal and ovarian cancer.	1992-12-29
781	Rifabutin	Mycobutin	1989-12-18	Prevention of disseminated Mycobacterium avium complex disease in patients with advanced HIV infection.	Designated/Approved	Approved for Orphan Indication	Prevention of disseminated Mycobacterium avium complex disease in patients with advanced HIV infections.	1992-12-23
782	Dronabinol	Marinol	1991-01-15	For the stimulation of appetite and prevention of weight loss in patients with a confirmed diagnosis of AIDS.	Designated/Approved	Approved for Orphan Indication	Treatment of anorexia associated with weight loss in patients with AIDS.	1992-12-22
783	Levocarnitine	Carnitor	1984-07-26	Treatment of primary and secondary carnitine deficiency of genetic origin.	Designated/Approved	Approved for Orphan Indication	Treatment of primary systemic carnitine deficiency. (approved 12/27/85) Treatment of secondary carnitine deficiency. (approved 12/16/92)	1992-12-16
784	Atovaquone	Mepron	1990-09-10	Treatment of AIDS associated Pneumocystis Carinii Pneumonia.	Designated/Approved	Approved for Orphan Indication	For the acute oral treatment of mild to moderate Pneumocystis carinii pneumonia in patients who are intolerant to trimethoprim-sulfamethoxazole.	1992-11-25
785	Melphalan	Alkeran For Injection	1992-02-24	Treatment of patients with multiple myeloma for whom oral therapy is inappropriate.	Designated/Approved	Approved for Orphan Indication	For the palliative treatment of patients with multiple myeloma for whom oral melphalan is not appropriate.	1992-11-18
786	Sotalol HCl	Betapace	1988-09-23	1. Treatment of life-threatening ventricular tachyarrhythmias 2. Prevention of life treatening ventricular tachyarrhythmias	Designated/Approved	Approved for Orphan Indication	Treatment of life-threatening ventricular tachyarrhythmias	1992-10-30
787	Coagulation factor IX	Mononine	1989-06-27	Replacement treatment and prophylaxis of the hemorrhagic complications of hemophilia B.	Designated/Approved	Approved for Orphan Indication	Prevention and control of bleeding in factor IX deficiency, also known as hemophilia B or Christmas disease.	1992-08-20
788	Halofantrine	Halfan	1991-11-04	Treatment of mild to moderate acute malaria caused by susceptible strains of P. falciparum and P. vivax.	Designated/Approved	Approved for Orphan Indication	Treatment of adults who can tolerate oral medication and who have mild to moderate malaria caused by Plasmodium falciparum or Plasmodium vivax.	1992-07-24
789	Teniposide	Vumon For Injection	1984-11-01	Treatment of refractory childhood acute lymphocytic leukemia.	Designated/Approved	Approved for Orphan Indication	Induction therapy in patients with refractory childhood acute lymphoblastic leukemia when used in combination with other approved anticancer agents.	1992-07-14
790	baclofen	Lioresal Intrathecal	1987-11-10	Treatment of intractable spasticity caused by spinal cord injury, multiple sclerosis, and other spinal diseases (including spinal ischemia, spinal tumor, transverse myelitis, cervical spondylosis, and degenerative myelopathy).	Designated/Approved	Approved for Orphan Indication	Management of severe spasticity of spinal cord origin in patients who are unresponsive to oral baclofen therapy or experience intolerable CNS side effects at effective doses.	1992-06-25
791	Zalcitabine	Hivid	1988-06-28	Treatment of AIDS.	Designated/Approved	Approved for Orphan Indication	Combination therapy with zidovudine is indicated for the treatment of adult patients with advanced HIV infection (CD4 count < 300) who have demonstrated malignant clinical or immunologic deterioration.	1992-06-19
792	Aldesleukin	Proleukin	1988-09-14	Treatment of metastatic renal cell carcinoma.	Designated/Approved	Approved for Orphan Indication	Treatment of adults (>18 years old) with metastatic renal cell carcinoma.	1992-05-05
793	Nafarelin acetate	Synarel Nasal Solution	1988-07-20	Treatment of central precocious puberty.	Designated/Approved	Approved for Orphan Indication	Treatment of central precocious puberty (gonadotropin-dependent precocious puberty) in children of both sexes.	1992-02-26
794	Liothyronine sodium injection	Triostat	1990-07-30	Treatment of myxedema coma/precoma.	Designated/Approved	Approved for Orphan Indication	Treatment of myxedema coma/precoma.	1991-12-31
795	Antithrombin III (human)	Thrombate Iii	1984-11-26	For replacement therapy in congenital deficiency of AT-III for prevention and treatment of thrombosis and pulmonary emboli.	Designated/Approved	Approved for Orphan Indication		1991-12-30
796	Histrelin acetate	Supprelin Injection	1988-08-10	Treatment of central precocious puberty.	Designated/Approved	Approved for Orphan Indication	Treatment of central precocious puberty.	1991-12-24
797	Leucovorin	Leucovorin Calcium	1986-12-08	For use in combination with 5-fluorouracil for the treatment of metastatic colorectal cancer.	Designated/Approved	Approved for Orphan Indication	For use in combination with 5-fluorouracil to prolong survival in the palliative treatment of patients with advanced colorectal cancer.	1991-12-12
798	pentostatin for injection	Nipent	1987-09-10	Treatment of hairy cell leukemia	Designated/Approved	Approved for Orphan Indication	Single agent treatment for adult patients with alpha-interferon-refractory hairy cell leukemia.	1991-10-11
799	Morphine sulfate concentrate (preservative free)	Infumorph	1990-07-12	For use in microinfusion devices for intraspinal administration in the treatment of intractable chronic pain.	Designated/Approved	Approved for Orphan Indication	For intrathecal or epidural infusion in the treatment of tractable chronic pain. It was developed for use in continuous microinfusion devices and may require dilution before use as directed.	1991-07-19
800	Beractant	Survanta Intratracheal Suspension	1986-02-05	Treatment of neonatal respiratory distress syndrome	Designated/Approved	Approved for Orphan Indication	Prevention of RDS (hyaline membrane disease) in premature infants less than 1250 grams birthweight or with evidence of surfactant deficiency	1991-07-02
801	Beractant	Survanta Intratracheal Suspension	1986-02-05	Treatment of neonatal respiratory distress syndrome	Designated/Approved	Approved for Orphan Indication	Treatment of ("rescue") of premature infants with RDS confirmed by x-ray and requiring mechanical ventilation	1991-07-01
802	Fludarabine phosphate	Fludara	1989-04-18	Treatment of chronic lymphocytic leukemia (CLL), including refractory CLL.	Designated/Approved	Approved for Orphan Indication		1991-04-18
803	Alglucerase injection	Ceredase	1985-03-11	For replacement therapy in patients with Gaucher's disease type I.	Designated/Approved	Approved for Orphan Indication	Long-term enzyme replacement therapy for children, adolescents and adult patients with a confirmed diagnosis of Type I Gaucher disease who exhibit signs and symptoms that are severe enough to result in one or more of the following conditions: a) moderate-to-severe anemia; b) thrombocytopenia with bleeding tendency; c) bone disease; d) significant hepatomegaly or splenomegaly.	1991-04-05
804	sargramostim	Leukine	1990-05-03	Treatment of neutropenia associated with bone marrow transplant, for the treatment of graft failure and delay of engraftment, and for the promotion of early engraftment.	Designated/Approved	Approved for Orphan Indication		1991-03-05
805	Succimer	Chemet Capsules	1984-05-09	Treatment of lead poisoning in children.	Designated/Approved	Approved for Orphan Indication		1991-01-30
806	Gallium nitrate injection	Ganite	1988-12-05	Treatment of hypercalcemia of malignancy.	Designated/Approved/Withdrawn			N/A
807	Coagulation Factor IX (human)	Alphanine	1990-07-05	For use as replacement therapy in patients with hemophilia B for the prevention and control of bleeding episodes, and during surgery to correct defective hemostasis.	Designated/Approved	Approved for Orphan Indication		1990-12-31
808	Epoetin alfa	Epogen	1991-07-01	Treatment of anemia associated with HIV infection or HIV treatment.	Designated/Approved	Approved for Orphan Indication	Treatment of AZT-induced anemia in HIV infected patients.	1990-12-31
809	Altretamine	Hexalen	1984-02-09	Treatment of advanced adenocarcinoma of the ovary.	Designated/Approved	Approved for Orphan Indication	Single agent palliative treatment of patients with persistent or recurrent ovarian cancer following first-line therapy with a cisplatin and/or alkylating agent based combination.	1990-12-26
810	Interferon gamma 1-b	Actimmune	1988-09-30	Treatment of chronic granulomatous disease.	Designated/Approved	Approved for Orphan Indication		1990-12-20
811	Calcium acetate	Phos-Lo	1988-12-22	Treatment of hyperphosphatemia in end stage renal failure.	Designated/Approved	Approved for Orphan Indication		1990-12-10
812	Eflornithine HCl	Ornidyl	1986-04-23	Treatment of Trypanosoma brucei gambiense infection (sleeping sickness).	Designated/Approved	Approved for Orphan Indication		1990-11-28
813	Citric acid, glucono-delta-lactone and magnesium carbonate	Renacidin Irrigation	1989-08-28	Treatment of renal and bladder calculi of the apatite or struvite variety.	Designated/Approved	Approved for Orphan Indication		1990-10-02
814	Idarubicin HCl for injection	Idamycin	1988-07-25	Treatment of acute myelogenous leukemia, also referred to as acute nonlymphocytic leukemia.	Designated/Approved	Approved for Orphan Indication		1990-09-27
815	Colfosceril palmitate, cetyl alcohol, tyloxapol	Exosurf Neonatal For Intratracheal Suspension	1989-10-20	1. Prevention of hyaline membrane disease, also known as respiratory distress syndrome, in infants born at 32 weeks gestation or less 2. prevention of hyaline membrane disease (HMD), also known as respiratory distress syndrome (RDS), in infants born at 32 weeks gestation or less and in the treatment of established HMO at all gestational ages.	Designated/Approved	Approved for Orphan Indication	Prevention of hyaline membrane disease (HMD), also known as respiratory distress syndrome (RDS), in infants born at 32 weeks gestation or less and in the treatment of established HMO at all gestational ages	1990-08-02
816	Pegademase bovine	Adagen	1984-05-29	For enzyme replacement therapy for ADA deficiency in patients with severe combined immunodeficiency.	Designated/Approved	Approved for Orphan Indication		1990-03-21
817	Botulinum toxin type A	Botox	1984-03-22	Treatment of strabismus and blepharospasms	Designated/Approved	Approved for Orphan Indication	Treatment of blepharospasm associated with dystonia in adults (patients 12 years of age and above)	1989-12-30
818	Botulinum toxin type A	Botox	1984-03-22	Treatment of strabismus and blepharospasms	Designated/Approved	Approved for Orphan Indication	Treatment of strabismus associated with dystonia in adults (patients 12 years of age and above)	1989-12-29
819	Cromolyn sodium	Gastrocrom	1984-03-08	Treatment of mastocytosis.	Designated/Approved	Approved for Orphan Indication		1989-12-22
820	Antithrombin III (human)	Atnativ	1985-02-08	For the treatment of patients with hereditary antithrombin III deficiency in connection with surgical or obstetrical procedures or when they suffer from thromboembolism.	Designated/Approved	Approved for Orphan Indication		1989-12-13
821	Gonadorelin acetate	Lutrepulse	1987-04-22	For induction of ovulation in women with hypothalamic amenorrhea due to a deficiency or absence in the quantity or pulse pattern of endogenous GnRH secretion.	Designated/Approved	Approved for Orphan Indication		1989-10-10
822	Ganciclovir sodium	Cytovene	1985-10-31	Treatment of cytomegalovirus retinitis in immunocompromised patients with AIDS.	Designated/Approved/Withdrawn			N/A
823	Pentamidine isethionate	Nebupent	1988-01-12	Prevention of Pneumocystis carinii pneumonia in patients at high risk of developing this disease.	Designated/Approved	Approved for Orphan Indication		1989-06-15
824	Selegiline HCl	Eldepryl	1984-11-07	As an adjuvant to levodopa and carbidopa treatment of idiopathic Parkinson's disease (paralysis agitans), postencephalitic Parkinsonism, and symptomatic Parkinsonism.	Designated/Approved	Approved for Orphan Indication		1989-06-05
825	Epoetin alfa	Epogen	1986-04-10	Treatment of anemia associated with end stage renal disease.	Designated/Approved	Approved for Orphan Indication	Treatment of anemia associated with chronic renal failure, including patients on dialysis (end stage renal disesae) and patients not on dialysis	1989-06-01
826	Rifampin	Rifadin I.V.	1985-12-09	For antituberculosis treatment where use of the oral form of the drug is not feasible.	Designated/Approved	Approved for Orphan Indication		1989-05-25
827	mefloquine HCL	Lariam	1988-04-13	For use in the treatment of acute malaria due to Plasmodium falciparum and Plasmodium vivax, and for the prophylaxis of Plasmodium falciparum malaria which is resistant to other available drugs	Designated/Approved	Approved for Orphan Indication	Prophylaxis of Plasmodium falciparum malaria which is resistant to other available drugs	1989-05-03
828	mefloquine HCL	Lariam	1988-04-13	For use in the treatment of acute malaria due to Plasmodium falciparum and Plasmodium vivax, and for the prophylaxis of Plasmodium falciparum malaria which is resistant to other available drugs	Designated/Approved	Approved for Orphan Indication	Treatment of acute malaria due to Plasmodium falciparum and Plasmodium vivax	1989-05-02
829	Mesna	Mesnex	1985-11-14	For use as a prophylactic agent in reducing the incidence of ifosfamide-induced hemorrhagic cystitis.	Designated/Approved	Approved for Orphan Indication		1988-12-30
830	Ifosfamide	Ifex	1987-01-20	Treatment of testicular cancer.	Designated/Approved	Approved for Orphan Indication	In combination with certain other approved antineoplastic agents, for third line chemotherapy in the treatment of germ cell testicular cancer.	1988-12-30
831	Ethanolamine oleate	Ethamolin	1984-03-22	Treatment of patients with esophageal varices that have recently bled, to prevent rebleeding.	Designated/Approved	Approved for Orphan Indication		1988-12-22
832	Metronidazole (topical)	Metrogel	1987-10-22	Treatment of acne rosacea.	Designated/Approved	Approved for Orphan Indication		1988-11-22
833	Interferon alfa-2b (recombinant)	Intron A	1987-06-24	Treatment of AIDS-related Kaposi's sarcoma.	Designated/Approved	Approved for Orphan Indication	Treatment of selected patients with AIDS-related Kaposi's sarcoma.	1988-11-21
834	Interferon alfa-2a (recombinant)	Roferon-A	1987-12-14	Treatment of AIDS related Kaposi's sarcoma.	Designated/Approved	Approved for Orphan Indication		1988-11-21
835	Leucovorin	Leucovorin Calcium	1988-08-17	For rescue use after high dose methotrexate therapy in the treatment of osteosarcoma.	Designated/Approved	Approved for Orphan Indication		1988-08-31
836	Tiopronin	Thiola	1986-01-17	Prevention of cystine nephrolithiasis in patients with homozygous cystinuria.	Designated/Approved	Approved for Orphan Indication	Indicated for the prevention of cystine (kidney) stone formation in patients with severe homozygous cystinuria with urinary cystine greater than 500 mg/day, who are resistant to treatment with conservative measures of high fluid intake, alkali and diet modification or who have adverse reactions to d-penicillamine.	1988-08-11
837	Methotrexate sodium	Methotrexate	1985-10-21	Treatment of osteogenic sarcoma.	Designated/Approved	Approved for Orphan Indication	For the use of high dose methotrexate with leucovorin rescue in patients with non-metastatic osteosarcoma who have undergone surgical resection or amputation for the primary tumor.	1988-04-07
838	Benzoate and phenylacetate	Ucephan	1986-01-21	For adjunctive therapy in the prevention and treatment of hyperammonemia in patients with urea cycle enzymopathy due to carbamylphosphate synthetase, ornithine, transcarbamylase, or argininosuccinate synthetase deficiency.	Designated/Approved	Approved for Orphan Indication		1987-12-23
839	Teriparatide	Parathar	1987-01-09	Diagnostic agent to assist in establishing the diagnosis in patients presenting with clinical and laboratory evidence of hypocalcemia due to either hypoparathyroidism or pseudohypoparathyroidism.	Designated/Approved	Approved for Orphan Indication		1987-12-23
840	Mitoxantrone HCl	Novantrone	1987-07-13	Treatment of acute myelogenous leukemia, also referred to as acute nonlymphocytic leukemia.	Designated/Approved	Approved for Orphan Indication		1987-12-23
841	Alpha1-proteinase inhibitor (human)	Prolastin	1984-12-07	For replacement therapy in the alpha-1-proteinase inhibitor congenital deficiency state.	Designated/Approved	Approved for Orphan Indication	For chronic replacement therapy of individuals having congenital deficiency of alpha1- proteinase inhibitor with clinically demonstrable panacinar emphysema.	1987-12-02
842	Pentastarch	Pentaspan	1985-08-28	As an adjunct in leukapheresis to improve the harvesting and increase the yield of leukocytes by centrifugal means.	Designated/Approved	Approved for Orphan Indication		1987-05-19
843	Etidronate disodium	Didronel	1986-03-21	Treatment of hypercalcemia of malignancy inadequately managed by dietary modification and/or oral hydration.	Designated/Approved	Approved for Orphan Indication		1987-04-21
844	zidovudine	Retrovir	1985-07-17	Treatment of AIDS	Designated/Approved	Approved for Orphan Indication	Management of certain adult patients with symptomatic HIV infection (AIDS and advanced ARC) who have a history of cytologically confirmed Pneumocytis carinii pneumonia (PCP) or an absolute CD4 (T4 helper/induccer) lymphocyte count of less than 200/mm in the peripheral blood before therapy is begun	1987-03-19
845	Somatropin for injection	Humatrope	1986-06-12	For the long-term treatment of children who have growth failure due to inadequate secretion of normal endogenous growth hormone.	Designated/Approved	Approved for Orphan Indication		1987-03-08
846	tranexamic acid	Cyklokapron	1985-12-03	For use in patients with congenital coagulopathies undergoing surgical procedures, e.g. dental extractions	Designated/Approved/Withdrawn		Treatment of patients with hemophilia for short term use (2 to 8 days) before and after tooth extraction to reduce or prevent hemorrhage abd reduce the need for replacement therapy	N/A
847	Clofazimine	Lamprene	1984-06-11	Treatment of lepromatous leprosy, including dapsone-resistant lepromatous leprosy and lepromatous leprosy complicated by erythema nodosum leprosum.	Designated/Approved	Approved for Orphan Indication		1986-12-15
848	Calcitonin-human for injection	Cibacalcin	1987-01-20	Treatment of symptomatic Paget's disease (osteitis deformans).	Designated/Approved	Approved for Orphan Indication		1986-10-31
849	Urofollitropin	Metrodin	1987-11-25	For induction of ovulation in patients with polycystic ovarian disease who have an elevated LH/FSH ratio and who have failed to respond to adequate clomiphene citrate therapy.	Designated/Approved	Approved for Orphan Indication		1986-09-18
850	Digoxin immune FAB (Ovine)	Digibind	1984-11-01	Treatment of potentially life threatening digitalis intoxication in patients who are refractory to management by conventional therapy.	Designated/Approved	Approved for Orphan Indication		1986-04-22
851	Levocarnitine	Carnitor	1984-02-28	Treatment of genetic carnitine deficiency.	Designated/Approved	Approved for Orphan Indication		1986-04-10
852	Trientine HCl	Syprine	1984-12-24	Treatment of patients with Wilson's disease who are intolerant, or inadequately responsive to penicillamine.	Designated/Approved	Approved for Orphan Indication		1985-11-08
853	Monooctanoin	Moctanin	1984-05-30	For dissolution of cholesterol gallstones retained in the common bile duct.	Designated/Approved	Approved for Orphan Indication		1985-10-31
854	Somatrem for injection	Protropin	1985-12-09	1. Long-term treatment of children who have growth failure due to a lack of adequate endogenous growth hormone secretion (prevalence 15,000) 2. Treatment of short stature associated with Turner's syndrome (prevalence 8000).	Designated/Approved	Approved for Orphan Indication		1985-10-17
855	Somatropin	Nutropin	1987-03-06	For use in the long-term treatment of children who have growth failure due to a lack of adequate endogenous growth hormone secretion.	Designated/Approved	Approved for Orphan Indication		1985-10-17
856	Potassium citrate	Urocit-K	1984-11-01	Prevention of uric acid nephrolithiasis.	Designated/Approved	Approved for Orphan Indication		1985-08-30
857	Potassium citrate	Urocit-K	1984-11-01	1. Prevention of calcium renal stones in patients with hypocitraturia 2. For avoidance of the complication of calcium stone formation in patients with uric lithiasis.	Designated/Approved	Approved for Orphan Indication	Prevention of recurring calcium conating stines associated with a deficiency in the urine.	1985-08-07
858	Naltrexone HCl	Trexan	1985-03-11	For blockade of the pharmacological effects of exogenously administered opioids as an adjunct to the maintenance of the opioid-free state in detoxified formerly opioid-dependent individuals.	Designated/Approved	Approved for Orphan Indication		1984-11-30
859	Pentamidine isethionate	Pentam 300	1984-02-28	Treatment of Pneumocystis carinii pneumonia.	Designated/Approved	Approved for Orphan Indication		1984-10-16
860	Cromolyn sodium 4% ophthalmic solution	Opticrom 4% Ophthalmic Solution	1985-07-24	Treatment of vernal keratoconjunctivitis.	Designated/Approved	Approved for Orphan Indication		1984-10-03
861	chenodiol	Chenix	1984-09-21	For patients with radiolucent stones in well opacifying gallbladders, in whom elective surgery would be undertaken except for the presence of increased surgical risk due to systemic disease or age	Designated/Approved	Approved for Orphan Indication		1983-07-28
862	Hemin	Panhematin	1984-03-16	Amelioration of recurrent attacks of acute intermittent porphyria (AIP) temporarily related to the menstrual cycle in susceptible women and similar symptoms which occur in other patients with AIP, porphyria variegata and hereditary coproporphyria.	Designated/Approved	Approved for Orphan Indication		1983-07-20

## Sheet: 1b_552 unique trade names
S1b File. The list of the 862 ODs’ 552 unique trade names, and their break up into (i) 413 with single approvals, (ii) 139 with multiple approvals, and (iii) 40 cases with trade names unavailable.
Number	List of 552 drugs with unique trade names, in FDAOD	Number of approvals of each trade name, in FDAOD	➡	Trade name with single approval (n=413)	Number of approvals of each trade name	+	Trade name with multiple approvals (n=139)	Number of approvals of each trade name	+	Others	Number of cases
1	1. Myozyme 2. Lumizyme	3		Abelcet	1		1. Myozyme 2. Lumizyme	3		Trade name unavailable	40
2	Abelcet	1		Abilify	1		Actemra	3
3	Abilify	1		Ablysinol	1		Actimmune	2
4	Ablysinol	1		Abraxane	1		Adcetris	7
5	Abraxane	1		Abthraxtm	1		Adempas	2
6	Abthraxtm	1		Acetadote	1		Adreview	2
7	Acetadote	1		Acthrel	1		Afinitor	5
8	Actemra	3		Adagen	1		Albenza	2
9	Acthrel	1		Adakveo	1		Alecensa	2
10	Actimmune	2		Adcirca	1		Alinia	2
11	Adagen	1		Agrylin	1		Ambisome	2
12	Adakveo	1		Aldurazyme	1		Antizole	2
13	Adcetris	7		Alimta	1		Arzerra	4
14	Adcirca	1		Aliqopa	1		Avastin	11
15	Adempas	2		Alkeran For Injection	1		Bendeka	2
16	Adreview	2		Alomide Ophthalmic Solution	1		Blincyto	2
17	Afinitor	5		Aloprim For Injection	1		Bosulif	2
18	Agrylin	1		Alphanate	1		Botox	4
19	Albenza	2		Alphanine	1		Carnitor	3
20	Aldurazyme	1		Alprolix	1		Cinryze(R)	2
21	Alecensa	2		Alunbrig	1		Coagadex	2
22	Alimta	1		Amatine	1		Copiktra	2
23	Alinia	2		Ammonul	1		Corifact	2
24	Aliqopa	1		Ampyra	1		Cresemba	2
25	Alkeran For Injection	1		Anascorp	1		Crysvita	2
26	Alomide Ophthalmic Solution	1		Anavip	1		Cyramza	3
27	Aloprim For Injection	1		Andexxa	1		Darzalex	6
28	Alphanate	1		Anthim	1		Doxil	2
29	Alphanine	1		Apokyn	1		Emflaza	2
30	Alprolix	1		Arcalyst	1		Empliciti	2
31	Alunbrig	1		Arikayce	1		Envarsus Xr	2
32	Amatine	1		Aromasin	1		Epidiolex	2
33	Ambisome	2		Arranon	1		Epogen	2
34	Ammonul	1		Ascor	1		Ethyol	2
35	Ampyra	1		Atnativ	1		Exjade; Jadenu Sprinkles	4
36	Anascorp	1		Atryn	1		Flolan	2
37	Anavip	1		Austedo	1		Fusilev	2
38	Andexxa	1		Avaclyr	1		Gattex	2
39	Anthim	1		Avonex	1		Gazyva	3
40	Antizole	2		Ayvakit	1		Genotropin	3
41	Apokyn	1		Azedra Ultratrace	1		Gilotrif	3
42	Arcalyst	1		Babybig	1		Gleevec	9
43	Arikayce	1		Banzel	1		Gliadel	2
44	Aromasin	1		Bavencio	1		Haegarda	2
45	Arranon	1		Beleodaq	1		Harvoni	3
46	Arzerra	4		Benefix	1		Hemlibra	2
47	Ascor	1		Betapace	1		Humatrope	3
48	Atnativ	1		Betaseron	1		Humira	7
49	Atryn	1		Bexxar	1		Iclusig	2
50	Austedo	1		Biktarvy	1		Ilaris	5
51	Avaclyr	1		Biothrax	1		Imbruvica	10
52	Avastin	11		Blenoxane	1		Infugem	2
53	Avonex	1		Brineura	1		Istodax	2
54	Ayvakit	1		Brukinsa	1		Jakafi	3
55	Azedra Ultratrace	1		Buphenyl	1		Kalbitor	2
56	Babybig	1		Busulfex	1		Kalydeco	8
57	Banzel	1		Cablivi	1		Kcentra	2
58	Bavencio	1		Cabometyx	1		Keytruda	10
59	Beleodaq	1		Cafcit	1		Lariam	2
60	Bendeka	2		Calquence	1		Lenvima	2
61	Benefix	1		Campath	1		Leucovorin Calcium	2
62	Betapace	1		Caprelsa(R)	1		Leukine	3
63	Betaseron	1		Carbaglu	1		Lynparza	8
64	Bexxar	1		Carnexiv	1		Makena	2
65	Biktarvy	1		Cayston	1		Mekinist	2
66	Biothrax	1		Ceprotin	1		Mekinist And Tafinlar	4
67	Blenoxane	1		Cerdelga	1		Mepron	2
68	Blincyto	2		Cerebyx	1		Mylotarg	2
69	Bosulif	2		Ceredase	1		Neupogen	5
70	Botox	4		Cerezyme	1		Nexavar	3
71	Brineura	1		Cetylev	1		Norditropin	2
72	Brukinsa	1		Chemet Capsules	1		Novantrone	4
73	Buphenyl	1		Chenix	1		Novoseven	6
74	Busulfex	1		Chirostim	1		Nplate	3
75	Cablivi	1		Cholbam	1		Nucala	2
76	Cabometyx	1		Cibacalcin	1		Nutropin	4
77	Cafcit	1		Clolar	1		Ofev	2
78	Calquence	1		Cnj-016	1		Oncaspar; Asparlas	2
79	Campath	1		Coartem	1		Opdivo	6
80	Caprelsa(R)	1		Colazal	1		Orfadin	2
81	Carbaglu	1		Colcrys	1		Orkambi	3
82	Carnexiv	1		Cometriq	1		Photofrin	2
83	Carnitor	3		Copaxone	1		Photrexa Viscous	2
84	Cayston	1		Cordarone	1		Procysbi	4
85	Ceprotin	1		Corlanor	1		Prograf	2
86	Cerdelga	1		Crestor	1		Proleukin	2
87	Cerebyx	1		Crofab	1		Promacta	3
88	Ceredase	1		Curosurf	1		Ravicti	2
89	Cerezyme	1		Cuvposa	1		Reblozyl	2
90	Cetylev	1		Cyanokit	1		Remicade	3
91	Chemet Capsules	1		Cyklokapron	1		Remodulin;Orenitram	2
92	Chenix	1		Cystadane	1		Revlimid	9
93	Chirostim	1		Cystagon	1		Rituxan	4
94	Cholbam	1		Cystaran	1		Rituxan Sc	2
95	Cibacalcin	1		Cytogam	1		Rozlytrek	2
96	Cinryze(R)	2		Cytovene	1		Rubraca	2
97	Clolar	1		Dacogen	1		Rydapt	2
98	Cnj-016	1		Daunoxome	1		Salagen	2
99	Coagadex	2		Daurismo	1		Sandostatin Lar	3
100	Coartem	1		Defitelio	1		Secreflo	3
101	Colazal	1		Depocyt	1		Sensipar	3
102	Colcrys	1		Descovy(R)	1		Signifor	2
103	Cometriq	1		Diacomit	1		Sirturo	2
104	Copaxone	1		Diastat	1		Soliris	4
105	Copiktra	2		Didronel	1		Somatuline Depot	2
106	Cordarone	1		Dificid	1		Sovaldi	3
107	Corifact	2		Digibind	1		Sprycel	4
108	Corlanor	1		Dorc Ilm-Blue	1		Steritalc	2
109	Cresemba	2		Droxia	1		Stivarga	2
110	Crestor	1		Duopa	1		Survanta Intratracheal Suspension	2
111	Crofab	1		Duraclon	1		Symdeko	2
112	Crysvita	2		Durezol	1		Tafinlar(R) Capsules A Nd Mekinist(R) Tablets	2
113	Curosurf	1		Dysport	1		Tagrisso	2
114	Cuvposa	1		Egaten	1		Tasigna	2
115	Cyanokit	1		Elaprase	1		Temodar	2
116	Cyklokapron	1		Eldepryl	1		Thalomid	2
117	Cyramza	3		Elelyso For Injection	1		Thiola	3
118	Cystadane	1		Elitek	1		Thyrogen	2
119	Cystagon	1		Ellence	1		Tibsovo	2
120	Cystaran	1		Elliotts B Solution	1		Tiglutik	2
121	Cytogam	1		Elmiron	1		Tindamax	2
122	Cytovene	1		Eloctate	1		Tracleer	2
123	Dacogen	1		Elzonris	1		Treanda	2
124	Darzalex	6		Enbrel	1		Trisenox	2
125	Daunoxome	1		Endari	1		Tybost®	2
126	Daurismo	1		Epclusa	1		Urocit-K	2
127	Defitelio	1		Erbitux	1		Velcade	5
128	Depocyt	1		Erwinase	1		Venclexta	4
129	Descovy(R)	1		Esbriet	1		Xalkori	2
130	Diacomit	1		Ethamolin	1		Xatmep	2
131	Diastat	1		Evista	1		Xgeva	2
132	Didronel	1		Evomela	1		Xiaflex	2
133	Dificid	1		Exondys 51	1		Xyrem	3
134	Digibind	1		Exosurf Neonatal For Intratracheal Suspension	1		Yervoy	3
135	Dorc Ilm-Blue	1		Exservan	1		Yescarta	3
136	Doxil	2		Extraneal (With 7.5% Icodextrin) Peritoneal Dialysis Solutio	1		Zejula	2
137	Droxia	1		Fabrazyme	1		Zelboraf	2
138	Duopa	1		Fareston	1		Zydelig	2
139	Duraclon	1		Farydak	1		Zykadia	2
140	Durezol	1		Feiba	1		Total	139
141	Dysport	1		Felbatol	1
142	Egaten	1		Ferriprox	1
143	Elaprase	1		Firazyr	1
144	Eldepryl	1		Firdapse	1
145	Elelyso For Injection	1		Fludara	1
146	Elitek	1		Folotyn	1
147	Ellence	1		Galafold	1
148	Elliotts B Solution	1		Galzin	1
149	Elmiron	1		Gamifant™	1
150	Eloctate	1		Gamimune N	1
151	Elzonris	1		Gammagard Liquid	1
152	Emflaza	2		Gammaplex	1
153	Empliciti	2		Gamunex-C	1
154	Enbrel	1		Ganite	1
155	Endari	1		Gastrocrom	1
156	Envarsus Xr	2		Geref	1
157	Epclusa	1		Givlaari	1
158	Epidiolex	2		Gleolan	1
159	Epogen	2		Gocovri	1
160	Erbitux	1		Gonal-F	1
161	Erwinase	1		Gralise	1
162	Esbriet	1		H.P. Acthar Gel	1
163	Ethamolin	1		Halaven	1
164	Ethyol	2		Halfan	1
165	Evista	1		Hemangeol	1
166	Evomela	1		Hepagam B	1
167	Exjade; Jadenu Sprinkles	4		Herceptin	1
168	Exondys 51	1		Hetlioz	1
169	Exosurf Neonatal For Intratracheal Suspension	1		Hexalen	1
170	Exservan	1		Hivid	1
171	Extraneal (With 7.5% Icodextrin) Peritoneal Dialysis Solutio	1		Hizentra	1
172	Fabrazyme	1		Horizant	1
173	Fareston	1		Humate-P	1
174	Farydak	1		Idamycin	1
175	Feiba	1		Idelvion	1
176	Felbatol	1		Idhifa	1
177	Ferriprox	1		Ifex	1
178	Firazyr	1		Imfinzi	1
179	Firdapse	1		Imlygic	1
180	Flolan	2		Impavido	1
181	Fludara	1		Increlex	1
182	Folotyn	1		Infasurf	1
183	Fusilev	2		Infumorph	1
184	Galafold	1		Inomax	1
185	Galzin	1		Inrebic	1
186	Gamifant™	1		Intron A	1
187	Gamimune N	1		Iplex	1
188	Gammagard Liquid	1		Iressa	1
189	Gammaplex	1		Isturisa	1
190	Gamunex-C	1		Ixiaro	1
191	Ganite	1		Jelmyto	1
192	Gastrocrom	1		Juxtapid	1
193	Gattex	2		Jynarque	1
194	Gazyva	3		Kanuma	1
195	Genotropin	3		Kineret	1
196	Geref	1		Kogenate	1
197	Gilotrif	3		Korlym	1
198	Givlaari	1		Krintafel	1
199	Gleevec	9		Krystexxa	1
200	Gleolan	1		Kuvan	1
201	Gliadel	2		Kymriah	1
202	Gocovri	1		Kymriah (Tisagenlecleucel)	1
203	Gonal-F	1		Kynamro	1
204	Gralise	1		Kyprolis	1
205	H.P. Acthar Gel	1		Lamictal	1
206	Haegarda	2		Lamprene	1
207	Halaven	1		Lartruvo	1
208	Halfan	1		Letairis	1
209	Harvoni	3		Leustatin Injection	1
210	Hemangeol	1		Lidoderm Patch	1
211	Hemlibra	2		Lioresal Intrathecal	1
212	Hepagam B	1		Lipiodol	1
213	Herceptin	1		Lonsurf	1
214	Hetlioz	1		Lorbrena	1
215	Hexalen	1		Lumoxiti	1
216	Hivid	1		Lupron Injection	1
217	Hizentra	1		Lutrepulse	1
218	Horizant	1		Luveris	1
219	Humate-P	1		Luxturna	1
220	Humatrope	3		Lymphoseek	1
221	Humira	7		M.V.I.-12	1
222	Iclusig	2		Macrelin	1
223	Idamycin	1		Marinol	1
224	Idelvion	1		Marqibo	1
225	Idhifa	1		Mavyret	1
226	Ifex	1		Megace	1
227	Ilaris	5		Membraneblue	1
228	Imbruvica	10		Mepsevii	1
229	Imfinzi	1		Mesnex	1
230	Imlygic	1		Methotrexate	1
231	Impavido	1		Metrodin	1
232	Increlex	1		Metrogel	1
233	Infasurf	1		Mitosol	1
234	Infugem	2		Mobic	1
235	Infumorph	1		Moctanin	1
236	Inomax	1		Mononine	1
237	Inrebic	1		Mozobil (R)	1
238	Intron A	1		Myalept	1
239	Iplex	1		Mycobutin	1
240	Iressa	1		Myobloc	1
241	Istodax	2		Naglazyme	1
242	Isturisa	1		Natpara	1
243	Ixiaro	1		Nayzilam	1
244	Jakafi	3		Nebupent	1
245	Jelmyto	1		Neoprofen	1
246	Juxtapid	1		Netspot	1
247	Jynarque	1		Neulasta	1
248	Kalbitor	2		Neumega	1
249	Kalydeco	8		Neutrexin	1
250	Kanuma	1		Ninlaro	1
251	Kcentra	2		Nipent	1
252	Keytruda	10		Nithiodote	1
253	Kineret	1		Normix	1
254	Kogenate	1		Normocarb Hf	1
255	Korlym	1		Northera	1
256	Krintafel	1		Norvir Powder For Oral Suspension	1
257	Krystexxa	1		Novoseven Rt	1
258	Kuvan	1		Nulojix	1
259	Kymriah	1		Nutrestore	1
260	Kymriah (Tisagenlecleucel)	1		Nutropin Depot	1
261	Kynamro	1		Nymalize	1
262	Kyprolis	1		Obizur	1
263	Lamictal	1		Ocaliva	1
264	Lamprene	1		Ocuflox Ophthalmic Solution	1
265	Lariam	2		Omegaven	1
266	Lartruvo	1		Oncoscint Cr/Ov	1
267	Lenvima	2		Onfi	1
268	Letairis	1		Onpattro	1
269	Leucovorin Calcium	2		Ontak	1
270	Leukine	3		Opsumit	1
271	Leustatin Injection	1		Opticrom 4% Ophthalmic Solution	1
272	Lidoderm Patch	1		Orlaam	1
273	Lioresal Intrathecal	1		Ornidyl	1
274	Lipiodol	1		Otezla®	1
275	Lonsurf	1		Oxbryta	1
276	Lorbrena	1		Oxervate	1
277	Lumoxiti	1		Ozobax	1
278	Lupron Injection	1		Ozurdex	1
279	Lutrepulse	1		Palynziq	1
280	Luveris	1		Panhematin	1
281	Luxturna	1		Panretin	1
282	Lymphoseek	1		Parathar	1
283	Lynparza	8		Paser Granules	1
284	M.V.I.-12	1		Pentam 300	1
285	Macrelin	1		Pentaspan	1
286	Makena	2		Phos-Lo	1
287	Marinol	1		Polivy	1
288	Marqibo	1		Pomalyst	1
289	Mavyret	1		Poteligeo	1
290	Megace	1		Pretomanid	1
291	Mekinist	2		Prevymis	1
292	Mekinist And Tafinlar	4		Priftin	1
293	Membraneblue	1		Prolastin	1
294	Mepron	2		Protropin	1
295	Mepsevii	1		Provayblue	1
296	Mesnex	1		Provigil	1
297	Methotrexate	1		Pulmozyme	1
298	Metrodin	1		Purixan	1
299	Metrogel	1		Qutenza	1
300	Mitosol	1		Radicava	1
301	Mobic	1		Radiogardase	1
302	Moctanin	1		Rapamune	1
303	Mononine	1		Rebetol	1
304	Mozobil (R)	1		Refacto, Xyntha	1
305	Myalept	1		Refluden	1
306	Mycobutin	1		Renacidin Irrigation	1
307	Mylotarg	2		Repatha	1
308	Myobloc	1		Respigam	1
309	Naglazyme	1		Retisert	1
310	Natpara	1		Retrovir	1
311	Nayzilam	1		Revcovi	1
312	Nebupent	1		Riastap	1
313	Neoprofen	1		Rifadin I.V.	1
314	Netspot	1		Rifater	1
315	Neulasta	1		Rilutek	1
316	Neumega	1		Rituxan(R); Mabthera(R)	1
317	Neupogen	5		Rituxin Sc	1
318	Neutrexin	1		Rixubis	1
319	Nexavar	3		Roferon A	1
320	Ninlaro	1		Roferon-A	1
321	Nipent	1		Ruconest	1
322	Nithiodote	1		Ruzurgi	1
323	Norditropin	2		Ryanodex	1
324	Normix	1		Sabril	1
325	Normocarb Hf	1		Saizen	1
326	Northera	1		Scenesse®	1
327	Norvir Powder For Oral Suspension	1		Sclerosol Intrapleural Aerosol	1
328	Novantrone	4		Seizalam	1
329	Novoseven	6		Serostim	1
330	Novoseven Rt	1		Siklos	1
331	Nplate	3		Simulect	1
332	Nucala	2		So-Aqueous	1
333	Nulojix	1		Somavert	1
334	Nutrestore	1		Spinraza	1
335	Nutropin	4		Strensiq	1
336	Nutropin Depot	1		Suboxone	1
337	Nymalize	1		Sucraid	1
338	Obizur	1		Sulfamylon Solution	1
339	Ocaliva	1		Sunosi	1
340	Ocuflox Ophthalmic Solution	1		Supprelin Injection	1
341	Ofev	2		Supprelin La	1
342	Omegaven	1		Sylatron	1
343	Oncaspar; Asparlas	2		Sylvant	1
344	Oncoscint Cr/Ov	1		Synarel Nasal Solution	1
345	Onfi	1		Synribo	1
346	Onpattro	1		Syprine	1
347	Ontak	1		Tafinlar	1
348	Opdivo	6		Takhzyro	1
349	Opsumit	1		Targretin	1
350	Opticrom 4% Ophthalmic Solution	1		Taxol	1
351	Orfadin	2		Tecentriq	1
352	Orkambi	3		Technetium Tc99m Sulfur Colloi	1
353	Orlaam	1		Tegsedi™	1
354	Ornidyl	1		Tepadina	1
355	Otezla®	1		Thrombate Iii	1
356	Oxbryta	1		Thyroshield	1
357	Oxervate	1		Tobi	1
358	Ozobax	1		Topamax	1
359	Ozurdex	1		Torisel	1
360	Palynziq	1		Totect(R)	1
361	Panhematin	1		Tpoxx	1
362	Panretin	1		Trasylol	1
363	Parathar	1		Tretten	1
364	Paser Granules	1		Trexan	1
365	Pentam 300	1		Trikafta	1
366	Pentaspan	1		Triostat	1
367	Phos-Lo	1		Triptodur	1
368	Photofrin	2		Trogarzo	1
369	Photrexa Viscous	2		Turalio	1
370	Polivy	1		Tyvaso	1
371	Pomalyst	1		Ucephan	1
372	Poteligeo	1		Ultomiris	1
373	Pretomanid	1		Unituxin	1
374	Prevymis	1		Uptravi	1
375	Priftin	1		Urso 250	1
376	Procysbi	4		Valchlor	1
377	Prograf	2		Valstar	1
378	Prolastin	1		Valtoco	1
379	Proleukin	2		Varizig	1
380	Promacta	3		Ventavis	1
381	Protropin	1		Vermox 500 Mg Chewable Tablets	1
382	Provayblue	1		Vesanoid	1
383	Provigil	1		Vidaza	1
384	Pulmozyme	1		Vimizim	1
385	Purixan	1		Viread	1
386	Qutenza	1		Vitrakvi	1
387	Radicava	1		Vitrasert Implant	1
388	Radiogardase	1		Vizimpro	1
389	Rapamune	1		Voraxaze	1
390	Ravicti	2		Votrient	1
391	Rebetol	1		Vpriv	1
392	Reblozyl	2		Vumon For Injection	1
393	Refacto, Xyntha	1		Vyndaqel; Vyndamax	1
394	Refluden	1		Vyondys 53	1
395	Remicade	3		Vyxeos	1
396	Remodulin;Orenitram	2		Wakix	1
397	Renacidin Irrigation	1		Wilate	1
398	Repatha	1		Winrho Sd	1
399	Respigam	1		Xenazine	1
400	Retisert	1		Xermelo	1
401	Retrovir	1		Xospata	1
402	Revcovi	1		Xpovio	1
403	Revlimid	9		Yondelis	1
404	Riastap	1		Zavesca	1
405	Rifadin I.V.	1		Zemplar	1
406	Rifater	1		Zenapax	1
407	Rilutek	1		Zevalin	1
408	Rituxan	4		Zinecard	1
409	Rituxan Sc	2		Zirgan	1
410	Rituxan(R); Mabthera(R)	1		Zolgensma	1
411	Rituxin Sc	1		Zolinza	1
412	Rixubis	1		Zometa, Zabel	1
413	Roferon A	1		Zorbtive	1
414	Roferon-A	1		Total	413
415	Rozlytrek	2
416	Rubraca	2
417	Ruconest	1
418	Ruzurgi	1
419	Ryanodex	1
420	Rydapt	2
421	Sabril	1
422	Saizen	1
423	Salagen	2
424	Sandostatin Lar	3
425	Scenesse®	1
426	Sclerosol Intrapleural Aerosol	1
427	Secreflo	3
428	Seizalam	1
429	Sensipar	3
430	Serostim	1
431	Signifor	2
432	Siklos	1
433	Simulect	1
434	Sirturo	2
435	So-Aqueous	1
436	Soliris	4
437	Somatuline Depot	2
438	Somavert	1
439	Sovaldi	3
440	Spinraza	1
441	Sprycel	4
442	Steritalc	2
443	Stivarga	2
444	Strensiq	1
445	Suboxone	1
446	Sucraid	1
447	Sulfamylon Solution	1
448	Sunosi	1
449	Supprelin Injection	1
450	Supprelin La	1
451	Survanta Intratracheal Suspension	2
452	Sylatron	1
453	Sylvant	1
454	Symdeko	2
455	Synarel Nasal Solution	1
456	Synribo	1
457	Syprine	1
458	Tafinlar	1
459	Tafinlar(R) Capsules A Nd Mekinist(R) Tablets	2
460	Tagrisso	2
461	Takhzyro	1
462	Targretin	1
463	Tasigna	2
464	Taxol	1
465	Tecentriq	1
466	Technetium Tc99m Sulfur Colloi	1
467	Tegsedi™	1
468	Temodar	2
469	Tepadina	1
470	Thalomid	2
471	Thiola	3
472	Thrombate Iii	1
473	Thyrogen	2
474	Thyroshield	1
475	Tibsovo	2
476	Tiglutik	2
477	Tindamax	2
478	Tobi	1
479	Topamax	1
480	Torisel	1
481	Totect(R)	1
482	Tpoxx	1
483	Tracleer	2
484	Trasylol	1
485	Treanda	2
486	Tretten	1
487	Trexan	1
488	Trikafta	1
489	Triostat	1
490	Triptodur	1
491	Trisenox	2
492	Trogarzo	1
493	Turalio	1
494	Tybost®	2
495	Tyvaso	1
496	Ucephan	1
497	Ultomiris	1
498	Unituxin	1
499	Uptravi	1
500	Urocit-K	2
501	Urso 250	1
502	Valchlor	1
503	Valstar	1
504	Valtoco	1
505	Varizig	1
506	Velcade	5
507	Venclexta	4
508	Ventavis	1
509	Vermox 500 Mg Chewable Tablets	1
510	Vesanoid	1
511	Vidaza	1
512	Vimizim	1
513	Viread	1
514	Vitrakvi	1
515	Vitrasert Implant	1
516	Vizimpro	1
517	Voraxaze	1
518	Votrient	1
519	Vpriv	1
520	Vumon For Injection	1
521	Vyndaqel; Vyndamax	1
522	Vyondys 53	1
523	Vyxeos	1
524	Wakix	1
525	Wilate	1
526	Winrho Sd	1
527	Xalkori	2
528	Xatmep	2
529	Xenazine	1
530	Xermelo	1
531	Xgeva	2
532	Xiaflex	2
533	Xospata	1
534	Xpovio	1
535	Xyrem	3
536	Yervoy	3
537	Yescarta	3
538	Yondelis	1
539	Zavesca	1
540	Zejula	2
541	Zelboraf	2
542	Zemplar	1
543	Zenapax	1
544	Zevalin	1
545	Zinecard	1
546	Zirgan	1
547	Zolgensma	1
548	Zolinza	1
549	Zometa, Zabel	1
550	Zorbtive	1
551	Zydelig	2
552	Zykadia	2
553	n/a	40
	Grand Total	862

## Sheet: 1c_413 single occurrence in FDAO
S1c File. Of the 413 single approval trade names, 123 had a single mention in the Orange Book, and 290 either did not have any mention in the Orange Book or had multiple mentions in it.
Number	Trade name with single approval in FDAOD (n=413)	Number of occurences in the Orange Book	➡	Trade name with single occurrence in FDAOD and in the Orange Book (n=123)	Number of occurences in the Orange Book	+	Trade name with no match in Orange Book, or showing multiple occurrences in FDAOD and the Orange Book (n=290)	Number of occurences in the Orange Book
1	Abelcet	1		Abelcet	1		Abilify	12
2	Abilify	12		Abraxane	1		Ablysinol	2
3	Ablysinol	2		Acetadote	1		Abthraxtm	0
4	Abraxane	1		Adcirca	1		Acthrel	0
5	Abthraxtm	0		Aliqopa	1		Adagen	0
6	Acetadote	1		Ammonul	1		Adakveo	0
7	Acthrel	0		Ampyra	1		Agrylin	2
8	Adagen	0		Aromasin	1		Aldurazyme	0
9	Adakveo	0		Arranon	1		Alimta	2
10	Adcirca	1		Ascor	1		Alkeran For Injection	0
11	Agrylin	2		Avaclyr	1		Alomide Ophthalmic Solution	0
12	Aldurazyme	0		Beleodaq	1		Aloprim For Injection	0
13	Alimta	2		Biktarvy	1		Alphanate	0
14	Aliqopa	1		Brukinsa	1		Alphanine	0
15	Alkeran For Injection	0		Busulfex	1		Alprolix	0
16	Alomide Ophthalmic Solution	0		Calquence	1		Alunbrig	3
17	Aloprim For Injection	0		Carbaglu	1		Amatine	0
18	Alphanate	0		Carnexiv	1		Anascorp	0
19	Alphanine	0		Cayston	1		Anavip	0
20	Alprolix	0		Cerdelga	1		Andexxa	0
21	Alunbrig	3		Cerebyx	1		Anthim	0
22	Amatine	0		Chenix	1		Apokyn	2
23	Ammonul	1		Cibacalcin	1		Arcalyst	0
24	Ampyra	1		Clolar	1		Arikayce	0
25	Anascorp	0		Coartem	1		Atnativ	0
26	Anavip	0		Colazal	1		Atryn	0
27	Andexxa	0		Colcrys	1		Austedo	3
28	Anthim	0		Cuvposa	1		Avonex	0
29	Apokyn	2		Cystadane	1		Ayvakit	3
30	Arcalyst	0		Cystaran	1		Azedra Ultratrace	0
31	Arikayce	0		Dacogen	1		Babybig	0
32	Aromasin	1		Daunoxome	1		Banzel	4
33	Arranon	1		Defitelio	1		Bavencio	0
34	Ascor	1		Depocyt	1		Benefix	0
35	Atnativ	0		Duopa	1		Betapace	5
36	Atryn	0		Durezol	1		Betaseron	0
37	Austedo	3		Egaten	1		Bexxar	0
38	Avaclyr	1		Eldepryl	1		Biothrax	0
39	Avonex	0		Elliotts B Solution	1		Blenoxane	2
40	Ayvakit	3		Elmiron	1		Brineura	0
41	Azedra Ultratrace	0		Endari	1		Buphenyl	2
42	Babybig	0		Epclusa	1		Cablivi	0
43	Banzel	4		Ethamolin	1		Cabometyx	3
44	Bavencio	0		Evista	1		Cafcit	2
45	Beleodaq	1		Evomela	1		Campath	0
46	Benefix	0		Exservan	1		Caprelsa(R)	0
47	Betapace	5		Fareston	1		Ceprotin	0
48	Betaseron	0		Firazyr	1		Ceredase	0
49	Bexxar	0		Firdapse	1		Cerezyme	0
50	Biktarvy	1		Fludara	1		Cetylev	2
51	Biothrax	0		Galafold	1		Chemet Capsules	0
52	Blenoxane	2		Ganite	1		Chirostim	0
53	Brineura	0		Givlaari	1		Cholbam	2
54	Brukinsa	1		Gleolan	1		Cnj-016	0
55	Buphenyl	2		Halaven	1		Cometriq	2
56	Busulfex	1		Halfan	1		Copaxone	3
57	Cablivi	0		Hemangeol	1		Cordarone	2
58	Cabometyx	3		Hetlioz	1		Corlanor	3
59	Cafcit	2		Hexalen	1		Crestor	4
60	Calquence	1		Impavido	1		Crofab	0
61	Campath	0		Inrebic	1		Curosurf	0
62	Caprelsa(R)	0		Korlym	1		Cyanokit	2
63	Carbaglu	1		Krintafel	1		Cyklokapron	2
64	Carnexiv	1		Kynamro	1		Cystagon	2
65	Cayston	1		Lipiodol	1		Cytogam	0
66	Ceprotin	0		Mavyret	1		Cytovene	3
67	Cerdelga	1		Membraneblue	1		Daurismo	2
68	Cerebyx	1		Mitosol	1		Descovy(R)	0
69	Ceredase	0		Moctanin	1		Diacomit	4
70	Cerezyme	0		Mycobutin	1		Diastat	5
71	Cetylev	2		Nayzilam	1		Didronel	3
72	Chemet Capsules	0		Neoprofen	1		Dificid	2
73	Chenix	1		Netspot	1		Digibind	0
74	Chirostim	0		Nipent	1		Dorc Ilm-Blue	0
75	Cholbam	2		Nithiodote	1		Droxia	3
76	Cibacalcin	1		Nutrestore	1		Duraclon	2
77	Clolar	1		Nymalize	1		Dysport	0
78	Cnj-016	0		Onpattro	1		Elaprase	0
79	Coartem	1		Opsumit	1		Elelyso For Injection	0
80	Colazal	1		Orlaam	1		Elitek	0
81	Colcrys	1		Ornidyl	1		Ellence	2
82	Cometriq	2		Oxbryta	1		Eloctate	0
83	Copaxone	3		Ozobax	1		Elzonris	0
84	Cordarone	2		Ozurdex	1		Enbrel	0
85	Corlanor	3		Panretin	1		Erbitux	0
86	Crestor	4		Parathar	1		Erwinase	0
87	Crofab	0		Pretomanid	1		Esbriet	4
88	Curosurf	0		Priftin	1		Exondys 51	2
89	Cuvposa	1		Provayblue	1		Exosurf Neonatal For Intratracheal Suspension	0
90	Cyanokit	2		Purixan	1		Extraneal (With 7.5% Icodextrin) Peritoneal Dialysis Solutio	0
91	Cyklokapron	2		Qutenza	1		Fabrazyme	0
92	Cystadane	1		Retisert	1		Farydak	3
93	Cystagon	2		Rifater	1		Feiba	0
94	Cystaran	1		Rilutek	1		Felbatol	3
95	Cytogam	0		Ruzurgi	1		Ferriprox	4
96	Cytovene	3		Ryanodex	1		Folotyn	2
97	Dacogen	1		Seizalam	1		Galzin	2
98	Daunoxome	1		Spinraza	1		Gamifant™	0
99	Daurismo	2		Supprelin La	1		Gamimune N	0
100	Defitelio	1		Synribo	1		Gammagard Liquid	0
101	Depocyt	1		Syprine	1		Gammaplex	0
102	Descovy(R)	0		Taxol	1		Gamunex-C	0
103	Diacomit	4		Thyroshield	1		Gastrocrom	2
104	Diastat	5		Tobi	1		Geref	3
105	Didronel	3		Torisel	1		Gocovri	2
106	Dificid	2		Tpoxx	1		Gonal-F	0
107	Digibind	0		Triostat	1		Gralise	2
108	Dorc Ilm-Blue	0		Turalio	1		H.P. Acthar Gel	2
109	Droxia	3		Tyvaso	1		Hepagam B	0
110	Duopa	1		Ucephan	1		Herceptin	0
111	Duraclon	2		Urso 250	1		Hivid	2
112	Durezol	1		Valchlor	1		Hizentra	0
113	Dysport	0		Vesanoid	1		Horizant	2
114	Egaten	1		Vidaza	1		Humate-P	0
115	Elaprase	0		Vyondys 53	1		Idamycin	3
116	Eldepryl	1		Vyxeos	1		Idelvion	0
117	Elelyso For Injection	0		Xermelo	1		Idhifa	2
118	Elitek	0		Xospata	1		Ifex	2
119	Ellence	2		Xpovio	1		Imfinzi	0
120	Elliotts B Solution	1		Yondelis	1		Imlygic	0
121	Elmiron	1		Zavesca	1		Increlex	0
122	Eloctate	0		Zirgan	1		Infasurf	0
123	Elzonris	0		Zolinza	1		Infumorph	2
124	Enbrel	0		Total	123		Inomax	2
125	Endari	1					Intron A	0
126	Epclusa	1					Iplex	0
127	Erbitux	0					Iressa	2
128	Erwinase	0					Isturisa	0
129	Esbriet	4					Ixiaro	0
130	Ethamolin	1					Jelmyto	0
131	Evista	1					Juxtapid	6
132	Evomela	1					Jynarque	5
133	Exondys 51	2					Kanuma	0
134	Exosurf Neonatal For Intratracheal Suspension	0					Kineret	0
135	Exservan	1					Kogenate	0
136	Extraneal (With 7.5% Icodextrin) Peritoneal Dialysis Solutio	0					Krystexxa	0
137	Fabrazyme	0					Kuvan	3
138	Fareston	1					Kymriah	0
139	Farydak	3					Kymriah (Tisagenlecleucel)	0
140	Feiba	0					Kyprolis	3
141	Felbatol	3					Lamictal	6
142	Ferriprox	4					Lamprene	2
143	Firazyr	1					Lartruvo	0
144	Firdapse	1					Letairis	2
145	Fludara	1					Leustatin Injection	0
146	Folotyn	2					Lidoderm Patch	0
147	Galafold	1					Lioresal Intrathecal	0
148	Galzin	2					Lonsurf	2
149	Gamifant™	0					Lorbrena	2
150	Gamimune N	0					Lumoxiti	0
151	Gammagard Liquid	0					Lupron Injection	0
152	Gammaplex	0					Lutrepulse	0
153	Gamunex-C	0					Luveris	0
154	Ganite	1					Luxturna	0
155	Gastrocrom	2					Lymphoseek	0
156	Geref	3					M.V.I.-12	0
157	Givlaari	1					Macrelin	0
158	Gleolan	1					Marinol	3
159	Gocovri	2					Marqibo	0
160	Gonal-F	0					Megace	3
161	Gralise	2					Mepsevii	0
162	H.P. Acthar Gel	2					Mesnex	2
163	Halaven	1					Methotrexate	0
164	Halfan	1					Metrodin	0
165	Hemangeol	1					Metrogel	2
166	Hepagam B	0					Mobic	3
167	Herceptin	0					Mononine	0
168	Hetlioz	1					Mozobil (R)	0
169	Hexalen	1					Myalept	0
170	Hivid	2					Myobloc	0
171	Hizentra	0					Naglazyme	0
172	Horizant	2					Natpara	0
173	Humate-P	0					Nebupent	2
174	Idamycin	3					Neulasta	0
175	Idelvion	0					Neumega	0
176	Idhifa	2					Neutrexin	2
177	Ifex	2					Ninlaro	3
178	Imfinzi	0					Normix	0
179	Imlygic	0					Normocarb Hf	0
180	Impavido	1					Northera	3
181	Increlex	0					Norvir Powder For Oral Suspension	0
182	Infasurf	0					Novoseven Rt	0
183	Infumorph	2					Nulojix	0
184	Inomax	2					Nutropin Depot	0
185	Inrebic	1					Obizur	0
186	Intron A	0					Ocaliva	2
187	Iplex	0					Ocuflox Ophthalmic Solution	0
188	Iressa	2					Omegaven	2
189	Isturisa	0					Oncoscint Cr/Ov	0
190	Ixiaro	0					Onfi	4
191	Jelmyto	0					Ontak	0
192	Juxtapid	6					Opticrom 4% Ophthalmic Solution	0
193	Jynarque	5					Otezla®	0
194	Kanuma	0					Oxervate	0
195	Kineret	0					Palynziq	0
196	Kogenate	0					Panhematin	0
197	Korlym	1					Paser Granules	0
198	Krintafel	1					Pentam 300	0
199	Krystexxa	0					Pentaspan	0
200	Kuvan	3					Phos-Lo	0
201	Kymriah	0					Polivy	0
202	Kymriah (Tisagenlecleucel)	0					Pomalyst	4
203	Kynamro	1					Poteligeo	0
204	Kyprolis	3					Prevymis	4
205	Lamictal	6					Prolastin	0
206	Lamprene	2					Protropin	0
207	Lartruvo	0					Provigil	2
208	Letairis	2					Pulmozyme	0
209	Leustatin Injection	0					Radicava	2
210	Lidoderm Patch	0					Radiogardase	0
211	Lioresal Intrathecal	0					Rapamune	5
212	Lipiodol	1					Rebetol	3
213	Lonsurf	2					Refacto, Xyntha	0
214	Lorbrena	2					Refluden	0
215	Lumoxiti	0					Renacidin Irrigation	0
216	Lupron Injection	0					Repatha	0
217	Lutrepulse	0					Respigam	0
218	Luveris	0					Retrovir	5
219	Luxturna	0					Revcovi	0
220	Lymphoseek	0					Riastap	0
221	M.V.I.-12	0					Rifadin I.V.	0
222	Macrelin	0					Rituxan(R); Mabthera(R)	0
223	Marinol	3					Rituxin Sc	0
224	Marqibo	0					Rixubis	0
225	Mavyret	1					Roferon A	0
226	Megace	3					Roferon-A	0
227	Membraneblue	1					Ruconest	0
228	Mepsevii	0					Sabril	2
229	Mesnex	2					Saizen	0
230	Methotrexate	0					Scenesse®	0
231	Metrodin	0					Sclerosol Intrapleural Aerosol	0
232	Metrogel	2					Serostim	0
233	Mitosol	1					Siklos	2
234	Mobic	3					Simulect	0
235	Moctanin	1					So-Aqueous	0
236	Mononine	0					Somavert	0
237	Mozobil (R)	0					Strensiq	0
238	Myalept	0					Suboxone	6
239	Mycobutin	1					Sucraid	0
240	Myobloc	0					Sulfamylon Solution	0
241	Naglazyme	0					Sunosi	2
242	Natpara	0					Supprelin Injection	0
243	Nayzilam	1					Sylatron	0
244	Nebupent	2					Sylvant	0
245	Neoprofen	1					Synarel Nasal Solution	0
246	Netspot	1					Tafinlar	2
247	Neulasta	0					Takhzyro	0
248	Neumega	0					Targretin	2
249	Neutrexin	2					Tecentriq	0
250	Ninlaro	3					Technetium Tc99m Sulfur Colloi	0
251	Nipent	1					Tegsedi™	0
252	Nithiodote	1					Tepadina	2
253	Normix	0					Thrombate Iii	0
254	Normocarb Hf	0					Topamax	8
255	Northera	3					Totect(R)	0
256	Norvir Powder For Oral Suspension	0					Trasylol	0
257	Novoseven Rt	0					Tretten	0
258	Nulojix	0					Trexan	0
259	Nutrestore	1					Trikafta	0
260	Nutropin Depot	0					Triptodur	0
261	Nymalize	1					Trogarzo	0
262	Obizur	0					Ultomiris	0
263	Ocaliva	2					Unituxin	0
264	Ocuflox Ophthalmic Solution	0					Uptravi	8
265	Omegaven	2					Valstar	0
266	Oncoscint Cr/Ov	0					Valtoco	3
267	Onfi	4					Varizig	0
268	Onpattro	1					Ventavis	3
269	Ontak	0					Vermox 500 Mg Chewable Tablets	0
270	Opsumit	1					Vimizim	0
271	Opticrom 4% Ophthalmic Solution	0					Viread	5
272	Orlaam	1					Vitrakvi	3
273	Ornidyl	1					Vitrasert Implant	0
274	Otezla®	0					Vizimpro	3
275	Oxbryta	1					Voraxaze	0
276	Oxervate	0					Votrient	2
277	Ozobax	1					Vpriv	0
278	Ozurdex	1					Vumon For Injection	0
279	Palynziq	0					Vyndaqel; Vyndamax	0
280	Panhematin	0					Wakix	2
281	Panretin	1					Wilate	0
282	Parathar	1					Winrho Sd	0
283	Paser Granules	0					Xenazine	2
284	Pentam 300	0					Zemplar	6
285	Pentaspan	0					Zenapax	0
286	Phos-Lo	0					Zevalin	0
287	Polivy	0					Zinecard	2
288	Pomalyst	4					Zolgensma	0
289	Poteligeo	0					Zometa, Zabel	0
290	Pretomanid	1					Zorbtive	0
291	Prevymis	4					Total	290
292	Priftin	1
293	Prolastin	0
294	Protropin	0
295	Provayblue	1
296	Provigil	2
297	Pulmozyme	0
298	Purixan	1
299	Qutenza	1
300	Radicava	2
301	Radiogardase	0
302	Rapamune	5
303	Rebetol	3
304	Refacto, Xyntha	0
305	Refluden	0
306	Renacidin Irrigation	0
307	Repatha	0
308	Respigam	0
309	Retisert	1
310	Retrovir	5
311	Revcovi	0
312	Riastap	0
313	Rifadin I.V.	0
314	Rifater	1
315	Rilutek	1
316	Rituxan(R); Mabthera(R)	0
317	Rituxin Sc	0
318	Rixubis	0
319	Roferon A	0
320	Roferon-A	0
321	Ruconest	0
322	Ruzurgi	1
323	Ryanodex	1
324	Sabril	2
325	Saizen	0
326	Scenesse®	0
327	Sclerosol Intrapleural Aerosol	0
328	Seizalam	1
329	Serostim	0
330	Siklos	2
331	Simulect	0
332	So-Aqueous	0
333	Somavert	0
334	Spinraza	1
335	Strensiq	0
336	Suboxone	6
337	Sucraid	0
338	Sulfamylon Solution	0
339	Sunosi	2
340	Supprelin Injection	0
341	Supprelin La	1
342	Sylatron	0
343	Sylvant	0
344	Synarel Nasal Solution	0
345	Synribo	1
346	Syprine	1
347	Tafinlar	2
348	Takhzyro	0
349	Targretin	2
350	Taxol	1
351	Tecentriq	0
352	Technetium Tc99m Sulfur Colloi	0
353	Tegsedi™	0
354	Tepadina	2
355	Thrombate Iii	0
356	Thyroshield	1
357	Tobi	1
358	Topamax	8
359	Torisel	1
360	Totect(R)	0
361	Tpoxx	1
362	Trasylol	0
363	Tretten	0
364	Trexan	0
365	Trikafta	0
366	Triostat	1
367	Triptodur	0
368	Trogarzo	0
369	Turalio	1
370	Tyvaso	1
371	Ucephan	1
372	Ultomiris	0
373	Unituxin	0
374	Uptravi	8
375	Urso 250	1
376	Valchlor	1
377	Valstar	0
378	Valtoco	3
379	Varizig	0
380	Ventavis	3
381	Vermox 500 Mg Chewable Tablets	0
382	Vesanoid	1
383	Vidaza	1
384	Vimizim	0
385	Viread	5
386	Vitrakvi	3
387	Vitrasert Implant	0
388	Vizimpro	3
389	Voraxaze	0
390	Votrient	2
391	Vpriv	0
392	Vumon For Injection	0
393	Vyndaqel; Vyndamax	0
394	Vyondys 53	1
395	Vyxeos	1
396	Wakix	2
397	Wilate	0
398	Winrho Sd	0
399	Xenazine	2
400	Xermelo	1
401	Xospata	1
402	Xpovio	1
403	Yondelis	1
404	Zavesca	1
405	Zemplar	6
406	Zenapax	0
407	Zevalin	0
408	Zinecard	2
409	Zirgan	1
410	Zolgensma	0
411	Zolinza	1
412	Zometa, Zabel	0
413	Zorbtive	0
	Total	413

## Sheet: 1d_123 single occurence in OB
S1d File. Of the 123 ODs with a single occurrence in the Orange Book, 72 were approved after 31 Dec 2008.
Number	Trade name with single occurrence in FDAOD and Orange Book (n=123)	Marketing Approval Date	➡	Trade name approved between 1 Jan 1983–31 Dec 2008 (n=51)	Marketing Approval Date	+	Trade name approved between 1 Jan 2009–17 Apr 2020 (n=72)	Marketing Approval Date
1	Epclusa	2020-03-19		Evista	2007-09-13		Epclusa	2020-03-19
2	Vyondys 53	2019-12-12		Torisel	2007-05-30		Vyondys 53	2019-12-12
3	Oxbryta	2019-11-25		Supprelin La	2007-05-03		Oxbryta	2019-11-25
4	Exservan	2019-11-22		Colazal	2006-12-20		Exservan	2019-11-22
5	Givlaari	2019-11-20		Zolinza	2006-10-06		Givlaari	2019-11-20
6	Brukinsa	2019-11-14		Dacogen	2006-05-02		Brukinsa	2019-11-14
7	Ozobax	2019-09-18		Neoprofen	2006-04-13		Ozobax	2019-09-18
8	Inrebic	2019-08-16		Arranon	2005-10-28		Inrebic	2019-08-16
9	Pretomanid	2019-08-14		Retisert	2005-04-08		Pretomanid	2019-08-14
10	Turalio	2019-08-02		Ammonul	2005-02-17		Turalio	2019-08-02
11	Xpovio	2019-07-03		Thyroshield	2005-01-12		Xpovio	2019-07-03
12	Biktarvy	2019-06-18		Clolar	2004-12-28		Biktarvy	2019-06-18
13	Nayzilam	2019-05-17		Nutrestore	2004-06-10		Nayzilam	2019-05-17
14	Ruzurgi	2019-05-06		Vidaza	2004-05-19		Ruzurgi	2019-05-06
15	Mavyret	2019-04-30		Acetadote	2004-01-23		Mavyret	2019-04-30
16	Avaclyr	2019-03-29		Zavesca	2003-07-31		Avaclyr	2019-03-29
17	Egaten	2019-02-13		Aromasin	1999-10-21		Egaten	2019-02-13
18	Firdapse	2018-11-28		Depocyt	1999-04-01		Firdapse	2018-11-28
19	Xospata	2018-11-28		Busulfex	1999-02-04		Xospata	2018-11-28
20	Seizalam	2018-09-14		Panretin	1999-02-02		Seizalam	2018-09-14
21	Galafold	2018-08-10		Priftin	1998-06-22		Galafold	2018-08-10
22	Onpattro	2018-08-10		Tobi	1997-12-22		Onpattro	2018-08-10
23	Krintafel	2018-07-20		Urso 250	1997-12-10		Krintafel	2018-07-20
24	Tpoxx	2018-07-13		Taxol	1997-08-04		Tpoxx	2018-07-13
25	Calquence	2017-10-31		Fareston	1997-05-29		Calquence	2017-10-31
26	Ascor	2017-10-02		Cystadane	1996-10-25		Ascor	2017-10-02
27	Aliqopa	2017-09-14		Abelcet	1996-10-18		Aliqopa	2017-09-14
28	Vyxeos	2017-08-03		Elliotts B Solution	1996-09-27		Vyxeos	2017-08-03
29	Endari	2017-07-07		Elmiron	1996-09-26		Endari	2017-07-07
30	Gleolan	2017-06-06		Cerebyx	1996-08-05		Gleolan	2017-06-06
31	Xermelo	2017-02-28		Daunoxome	1996-04-08		Xermelo	2017-02-28
32	Spinraza	2016-12-23		Rilutek	1995-12-12		Spinraza	2016-12-23
33	Carnexiv	2016-10-07		Vesanoid	1995-11-22		Carnexiv	2016-10-07
34	Netspot	2016-06-01		Rifater	1994-05-31		Netspot	2016-06-01
35	Provayblue	2016-04-08		Orlaam	1993-07-09		Provayblue	2016-04-08
36	Defitelio	2016-03-30		Mycobutin	1992-12-23		Defitelio	2016-03-30
37	Evomela	2016-03-10		Halfan	1992-07-24		Evomela	2016-03-10
38	Halaven	2016-01-28		Triostat	1991-12-31		Halaven	2016-01-28
39	Yondelis	2015-10-23		Nipent	1991-10-11		Yondelis	2015-10-23
40	Duopa	2015-01-09		Fludara	1991-04-18		Duopa	2015-01-09
41	Cerdelga	2014-08-19		Hexalen	1990-12-26		Cerdelga	2014-08-19
42	Ryanodex	2014-07-22		Ornidyl	1990-11-28		Ryanodex	2014-07-22
43	Beleodaq	2014-07-03		Eldepryl	1989-06-05		Beleodaq	2014-07-03
44	Purixan	2014-04-28		Ethamolin	1988-12-22		Purixan	2014-04-28
45	Lipiodol	2014-04-04		Parathar	1987-12-23		Lipiodol	2014-04-04
46	Impavido	2014-03-19		Ucephan	1987-12-23		Impavido	2014-03-19
47	Hemangeol	2014-03-14		Cibacalcin	1986-10-31		Hemangeol	2014-03-14
48	Hetlioz	2014-01-31		Syprine	1985-11-08		Hetlioz	2014-01-31
49	Opsumit	2013-10-18		Moctanin	1985-10-31		Opsumit	2013-10-18
50	Abraxane	2013-09-06		Chenix	1983-07-28		Abraxane	2013-09-06
51	Valchlor	2013-08-23		Ganite	N/A		Valchlor	2013-08-23
52	Nymalize	2013-05-10					Nymalize	2013-05-10
53	Kynamro	2013-01-29					Kynamro	2013-01-29
54	Synribo	2012-10-26					Synribo	2012-10-26
55	Cystaran	2012-10-02					Cystaran	2012-10-02
56	Durezol	2012-06-13					Durezol	2012-06-13
57	Korlym	2012-02-17					Korlym	2012-02-17
58	Mitosol	2012-02-07					Mitosol	2012-02-07
59	Firazyr	2011-08-25					Firazyr	2011-08-25
60	Nithiodote	2011-01-14					Nithiodote	2011-01-14
61	Ozurdex	2010-09-24					Ozurdex	2010-09-24
62	Cuvposa	2010-07-28					Cuvposa	2010-07-28
63	Carbaglu	2010-03-18					Carbaglu	2010-03-18
64	Cayston	2010-02-22					Cayston	2010-02-22
65	Ampyra	2010-01-22					Ampyra	2010-01-22
66	Qutenza	2009-11-16					Qutenza	2009-11-16
67	Zirgan	2009-09-15					Zirgan	2009-09-15
68	Tyvaso	2009-07-30					Tyvaso	2009-07-30
69	Colcrys	2009-07-29					Colcrys	2009-07-29
70	Adcirca	2009-05-22					Adcirca	2009-05-22
71	Coartem	2009-04-07					Coartem	2009-04-07
72	Membraneblue	2009-02-20					Membraneblue	2009-02-20
73	Evista	2007-09-13
74	Torisel	2007-05-30
75	Supprelin La	2007-05-03
76	Colazal	2006-12-20
77	Zolinza	2006-10-06
78	Dacogen	2006-05-02
79	Neoprofen	2006-04-13
80	Arranon	2005-10-28
81	Retisert	2005-04-08
82	Ammonul	2005-02-17
83	Thyroshield	2005-01-12
84	Clolar	2004-12-28
85	Nutrestore	2004-06-10
86	Vidaza	2004-05-19
87	Acetadote	2004-01-23
88	Zavesca	2003-07-31
89	Aromasin	1999-10-21
90	Depocyt	1999-04-01
91	Busulfex	1999-02-04
92	Panretin	1999-02-02
93	Priftin	1998-06-22
94	Tobi	1997-12-22
95	Urso 250	1997-12-10
96	Taxol	1997-08-04
97	Fareston	1997-05-29
98	Cystadane	1996-10-25
99	Abelcet	1996-10-18
100	Elliotts B Solution	1996-09-27
101	Elmiron	1996-09-26
102	Cerebyx	1996-08-05
103	Daunoxome	1996-04-08
104	Rilutek	1995-12-12
105	Vesanoid	1995-11-22
106	Rifater	1994-05-31
107	Orlaam	1993-07-09
108	Mycobutin	1992-12-23
109	Halfan	1992-07-24
110	Triostat	1991-12-31
111	Nipent	1991-10-11
112	Fludara	1991-04-18
113	Hexalen	1990-12-26
114	Ornidyl	1990-11-28
115	Eldepryl	1989-06-05
116	Ethamolin	1988-12-22
117	Parathar	1987-12-23
118	Ucephan	1987-12-23
119	Cibacalcin	1986-10-31
120	Syprine	1985-11-08
121	Moctanin	1985-10-31
122	Chenix	1983-07-28
123	Ganite	N/A

## Sheet: 1e_72 ODs ➡ 63+9
S1e File. Of the 72 ODs approved after 31 Dec 2008, 63 had publicly available FDA documents such as the Medical Review.
Number	Trade name approved between 1 Jan 2009–17 April 2020 (n=72)	➡	Trade names with available MedRs (n=63)	+	Trade names without available MedRs (n=9)
1	Epclusa		Vyondys 53		Epclusa
2	Vyondys 53		Oxbryta		Biktarvy
3	Oxbryta		Exservan		Mavyret
4	Exservan		Givlaari		Halaven
5	Givlaari		Brukinsa		Lipiodol
6	Brukinsa		Ozobax		Abraxane
7	Ozobax		Inrebic		Durezol
8	Inrebic		Pretomanid		Ozurdex
9	Pretomanid		Turalio		Colcrys
10	Turalio		Xpovio
11	Xpovio		Nayzilam
12	Biktarvy		Ruzurgi
13	Nayzilam		Avaclyr
14	Ruzurgi		Egaten
15	Mavyret		Firdapse
16	Avaclyr		Xospata
17	Egaten		Seizalam
18	Firdapse		Galafold
19	Xospata		Onpattro
20	Seizalam		Krintafel
21	Galafold		Tpoxx
22	Onpattro		Calquence
23	Krintafel		Ascor
24	Tpoxx		Aliqopa
25	Calquence		Vyxeos
26	Ascor		Endari
27	Aliqopa		Gleolan
28	Vyxeos		Xermelo
29	Endari		Spinraza
30	Gleolan		Carnexiv
31	Xermelo		Netspot
32	Spinraza		Provayblue
33	Carnexiv		Defitelio
34	Netspot		Evomela
35	Provayblue		Yondelis
36	Defitelio		Duopa
37	Evomela		Cerdelga
38	Halaven		Ryanodex
39	Yondelis		Beleodaq
40	Duopa		Purixan
41	Cerdelga		Impavido
42	Ryanodex		Hemangeol
43	Beleodaq		Hetlioz
44	Purixan		Opsumit
45	Lipiodol		Valchlor
46	Impavido		Nymalize
47	Hemangeol		Kynamro
48	Hetlioz		Synribo
49	Opsumit		Cystaran
50	Abraxane		Korlym
51	Valchlor		Mitosol
52	Nymalize		Firazyr
53	Kynamro		Nithiodote
54	Synribo		Cuvposa
55	Cystaran		Carbaglu
56	Durezol		Cayston
57	Korlym		Ampyra
58	Mitosol		Qutenza
59	Firazyr		Zirgan
60	Nithiodote		Tyvaso
61	Ozurdex		Adcirca
62	Cuvposa		Coartem
63	Carbaglu		Membraneblue
64	Cayston
65	Ampyra
66	Qutenza
67	Zirgan
68	Tyvaso
69	Colcrys
70	Adcirca
71	Coartem
72	Membraneblue

## Sheet: 1f_Year of marketing approval_na
S1f File. The list of 63 ODs, with their year of marketing approval and the FDA document consulted for this study.
Number	Name of OD	Year of Marketing Approval	Nature of MedR associated with each OD
1	VYONDYS 53	2019	Clinical Review
2	OXBRYTA	2019	Multidiscipline Review
3	EXSERVAN	2019	Clinical Review
4	GIVLAARI	2019	Multidiscipline Review
5	BRUKINSA	2019	Multidiscipline Review
6	OZOBAX	2019	Clinical Review
7	INREBIC	2019	Multidiscipline Review
8	PRETOMANID	2019	Multidiscipline Review
9	TURALIO	2019	Multidiscipline Review
10	XPOVIO	2019	Multidiscipline Review
11	NAYZILAM	2019	Clinical Review
12	RUZURGI	2019	Clinical Review
13	AVACLYR	2019	Clinical Review
14	EGATEN	2019	Multidiscipline Review
15	FIRDAPSE	2018	Clinical Review
16	XOSPATA	2018	Multidiscipline Review
17	SEIZALAM	2018	Clinical Review
18	GALAFOLD	2018	Multidiscipline Review
19	ONPATTRO	2018	Multidiscipline Review
20	KRINTAFEL	2018	Multidiscipline Review
21	TPOXX	2018	Clinical Review
22	CALQUENCE	2017	Multidiscipline Review
23	ASCOR	2017	Clinical Review
24	ALIQOPA	2017	Multidiscipline Review
25	VYXEOS	2017	Multidiscipline Review
26	ENDARI	2017	Clinical Review
27	GLEOLAN	2017	Clinical Review
28	XERMELO	2017	Medical Review
29	SPINRAZA	2016	Medical Review
30	CARNEXIV	2016	Medical Review
31	NETSPOT	2016	Medical Review
32	PROVAYBLUE	2016	Medical Review
33	DEFITELIO	2016	Medical Review
34	EVOMELA	2016	Medical Review
35	YONDELIS	2015	Medical Review
36	DUOPA	2015	Medical Review
37	CERDELGA	2014	Medical Review
38	RYANODEX	2014	Medical Review
39	BELEODAQ	2014	Medical Review
40	PURIXAN	2014	Medical Review
41	IMPAVIDO	2014	Medical Review
42	HEMANGEOL	2014	Medical Review
43	HETLIOZ	2014	Medical Review
44	OPSUMIT	2013	Medical Review
45	VALCHLOR	2013	Medical Review
46	NYMALIZE	2013	Medical Review
47	KYNAMRO	2013	Medical Review
48	SYNRIBO	2012	Medical Review
49	CYSTARAN	2012	Medical Review
50	KORLYM	2012	Medical Review
51	MITOSOL	2012	Medical Review
52	FIRAZYR	2011	Medical Review
53	NITHIODOTE	2011	Medical Review
54	CUVPOSA	2010	Medical Review
55	CARBAGLU	2010	Medical Review
56	CAYSTON	2010	Medical Review
57	AMPYRA	2010	Medical Review
58	QUTENZA	2009	Medical Review
59	ZIRGAN	2009	Medical Review
60	TYVASO	2009	Medical Review
61	ADCIRCA	2009	Medical Review
62	COARTEM	2009	Medical Review
63	MEMBRANEBLUE	2009	Medical Review

## Sheet: 1g_ODs over the years
S1g File. From 2009–2020, per year (i) the number of ODs in this study, (ii) the percentage of ODs, out of 63 (iii) the percentage, in 3-year segments.
Year	Number of ODs in this study	Percentage of ODs, out of 63	Percentage in 3-year segments
2009	6	9.52381	19.0476
2010	4	6.34921
2011	2	3.1746
2012	4	6.34921	23.8095
2013	4	6.34921
2014	7	11.1111
2015	2	3.1746	23.8095
2016	6	9.52381
2017	7	11.1111
2018	7	11.1111	33.3333
2019	14	22.2222
2020	0	0
	63	100
